# Supplementary material
Source: publisher figshare collection journal article supplement (https://acs.figshare.com/ndownloader/files/26705108)
Supplement: Supplementary file 1 [file 26705108]

# Incorporation of Basic $\alpha$ -Hydroxy Acid Residues into Primitive Polyester Microdroplets for RNA Segregation

*Tony Z. Jia<sup>1,2,\*</sup>, Niraja V. Bapat<sup>1,3</sup>, Ajay Verma<sup>3,†</sup>, Irena Mamajanov<sup>1</sup>, H. James Cleaves II<sup>1,2,4</sup>,*

*Kuhan Chandru<sup>5,6\*</sup>*

<sup>1</sup>Earth-Life Science Institute, Tokyo Institute of Technology, 2-12-1-IE-1 Ookayama,  
Meguro-ku, Tokyo 152-8550, Japan

<sup>2</sup>Blue Marble Space Institute of Science, 1001 4th Ave., Suite 3201, Seattle, Washington  
98154 USA

<sup>3</sup>Department of Biology, Indian Institute of Science Education and Research, Dr. Homi  
Bhabha Road, Ward No. 8, NCL Colony, Pashan, Pune, Maharashtra 411008, India

<sup>4</sup>Institute for Advanced Study, 1 Einstein Drive, Princeton, NJ 08540, USA

<sup>5</sup>Department of Physical Chemistry, University of Chemistry and Technology, Prague,  
Technicka 5, 16628, Prague 6 – Dejvice, Czech Republic

<sup>6</sup>Space Science Centre (ANGKASA), Institute of Climate Change, National University of  
Malaysia, 43650 UKM Bangi, Selangor Darul Ehsan, Malaysia

<sup>†</sup>Current Address: Institut Pierre-Gilles de Gennes, CBI, ESPCI Paris, Université PSL,  
CNRS, 75005 Paris, France

\*Corresponding Authors

## **Table of Contents**

|                       |    |
|-----------------------|----|
| Supplementary Methods | 3  |
| Supporting Figures    | 6  |
| Supporting Tables     | 42 |
| References            | 76 |

## Supplementary Methods

**Matrix-assisted laser desorption ionization time-of-flight mass spectrometry (MALDI-TOF-MS) peak identification.** Monoisotopic peaks were identified by isolating the highest intensity peak in an isotope envelope that corresponded to a polymer product using a peak list generated from mMass<sup>1-3</sup> (Open Source Software, Prague, Czech Republic) after smoothing (Savitsky-Golay, window size = 0.3 m/z, 2 cycles), baselining (100 precision and 0 relative offset), and thresholding above an intensity of 5000, in that order. Major peaks were isolated by applying the following parameters: S/N > 10, absolute peak intensity > 5000, picking height at 100%, while applying baselining, smoothing, and deisotoping (maximum charge = 1, isotope mass tolerance = 0.1 m/z, isotope intensity tolerance = 50%, isotope mass shift = 0.0, remove isotopes, remove unknown, label envelope tool = 1st selected, envelope intensity = envelope maximum). Analytical settings, matrix, and thresholding parameters were identical for each experiment. Although other adducts were also observed, we list only the following adducts: M+H, M+H-H<sub>2</sub>O (cyclic), M+Na-H<sub>2</sub>O (cyclic), and M+Na+ethanolamine (“M+H/Na-H<sub>2</sub>O (cyclic)”: possibility of both dehydrated or cyclic species), which were the major adducts observed, and also ones that most clearly showed mass ladders. Mass accuracy in ppm was calculated by comparing the observed mass with the calculated mass for major peaks corresponding to polymerization products. Detailed peak lists are presented in **Tables S1–S12**.

**Electrospray Ionization (ESI)-MS.** Polymerized 4a2h homopolymer and 1:1 4a2h:αHA (α-hydroxy acid) samples (of GA, LA, PA, SA, and MA) were first rehydrated in 500 μL water. Then, a 1 mL sample of each polyester diluted 1000-fold (in HPLC-grade water) was subjected to positive-ion mode ESI-MS acquisition, on a Xevo TQ-S quadrupole time-of-flight mass spectrometer (Waters, Milford, Massachusetts, USA) with direct infusion. The following acquisition parameters: sample infusion flow rate of 10 μL min<sup>-1</sup>, an ion source temperature of 100°C, a desolvation gas temperature of 250°C, a desolvation gas flow rate of 500 L h<sup>-1</sup>, a cone voltage of 10 V, a cone gas flow rate of 100 L h<sup>-1</sup>, and a capillary voltage of 3.0 kV. A water blank was injected between all samples. Peaks were identified using the information from the MALDI-TOF-MS peaklists (**Tables S1–S12**). Analytical settings, matrix, and thresholding parameters were identical among different runs of experiments. Although we also observed other adducts,

including some of those listed in **Tables S1–S12**, we list only the M+H–H<sub>2</sub>O (cyclic or dehydrated) adducts for ease of visualization.

**Fluorescence Microscopy Analysis.** For **Figs. 8, S16–S25, and S28**, fluorescence acquisition (excitation illumination strength and exposure time) and image processing parameters (brightness/contrast) were constant down each column. This was important to ensure the ability to directly compare fluorescence intensity values between the relevant images within each figure. Kymographs were acquired with Fiji across the same line, which was consistent down each row for each relevant figure. For **Fig. S41**, the powdery poly(4a2h) synthesis product was deposited directly onto a glass slide and observed by microscope.

**Hammerhead Ribozyme Reaction.** The hammerhead ribozyme reaction was performed by preparing a 5  $\mu$ L sample containing 4  $\mu$ M HH1 (5'-FAM-CGCGCCGAAACACCGUGUCUCGAGC-3'; FAM = 6-carboxyfluorescein), 6  $\mu$ M HH2 (5'-GGCUCGACUGAUGAGGCGCG-3'), 200 mM MES pH 5.7, and 100 mM MgCl<sub>2</sub> in the presence or absence of polyester components. This was done by first mixing 3  $\mu$ L of the appropriate stock polyester sample (after rehydration with 500  $\mu$ L 4:1 water:acetonitrile; in this particular study, all samples were dissolved in 4:1 water:acetonitrile even if they did not require acetonitrile for rehydration, resulting in a 12% aqueous acetonitrile solvent) with 1.5  $\mu$ L of the other components not including magnesium (0.2  $\mu$ L HH1 (100  $\mu$ M stock), 0.3  $\mu$ L HH2 (100  $\mu$ M stock), and 1  $\mu$ L MES pH 5.7 (1 M stock)). Otherwise in the absence of polyester samples, the reaction occurred in pure water. Then, 0.5  $\mu$ L of a 1 M MgCl<sub>2</sub> stock solution (final MgCl<sub>2</sub> concentration of 100 mM) was added to initiate the reaction. All buffers used in this section were either made with RNase-free water and subsequently filtered, or were purchased as RNase free (except the sample loading buffer purchased from Thermo-Fisher). The reactions were stopped after 24 hours by adding 200  $\mu$ L of 4:1 ethanol:RNase-free water, 50  $\mu$ g/mL glycogen, and 125 mM ammonium acetate solution, followed by 15 minutes incubation at –20°C for precipitation. After incubation, samples were subjected to centrifugation at 21,500 g for 15 minutes (4°C) in a himac CT 15RE benchtop centrifuge (Hitachi, Chiyoda-ku, Tokyo, Japan), followed by supernatant removal by pipet. The remaining pellet was allowed to air dry for several minutes, followed by dissolution in 5  $\mu$ L of 2X Novex TBE-Urea Sample Buffer (Thermo-Fisher Scientific) by pipetting. 2.5  $\mu$ L of each sample



was loaded onto a pre-cast 12-well 6% Novex TBE-Urea gel, followed by electrophoresis (150 V, 35 minutes) in a Novex gel running box (Thermo-Fisher Scientific). The gel was then imaged (Blue channel (460 nm) on automatic mode) on an Amersham Imager 600 (GE Life Sciences, Shinjuku-ku, Tokyo, Japan) after separation from the plastic casing. Finally, the total gel band intensities were measured by FIJI, and the fraction of accumulated product was calculated by dividing the total intensity of the product fraction by the total intensity of both the product and remaining reactant fractions. Means and standard errors to the mean were calculated accordingly ( $n = 4$ ).

**Figure S1**

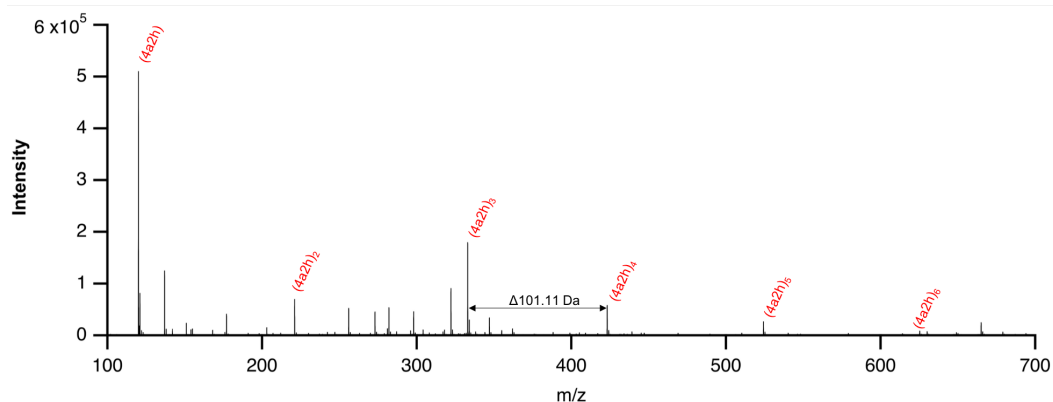

Positive ion-mode MALDI-TOF mass spectrum of the polymerization product ( $\Delta 101.11$  Da) of complete drying of a 4a2h solution at  $80^\circ\text{C}$  for one week. Indicated peaks are proton adducts. MALDI-TOF-MS was chosen rather than ESI-MS due to the required dissolution (and possible hydrolysis) of the sample upon dilution in the aqueous sample running solvent. The peak list is shown in **Tables S1** and **S2**.

**Figure S2**

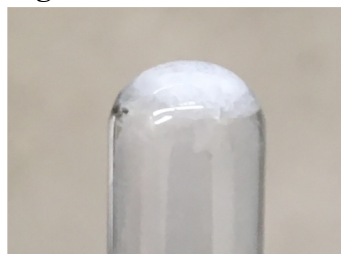

Photograph of white, powdery product resulting from drying 4a2h solution at  $80^\circ\text{C}$  for one week.

**Figure S3**

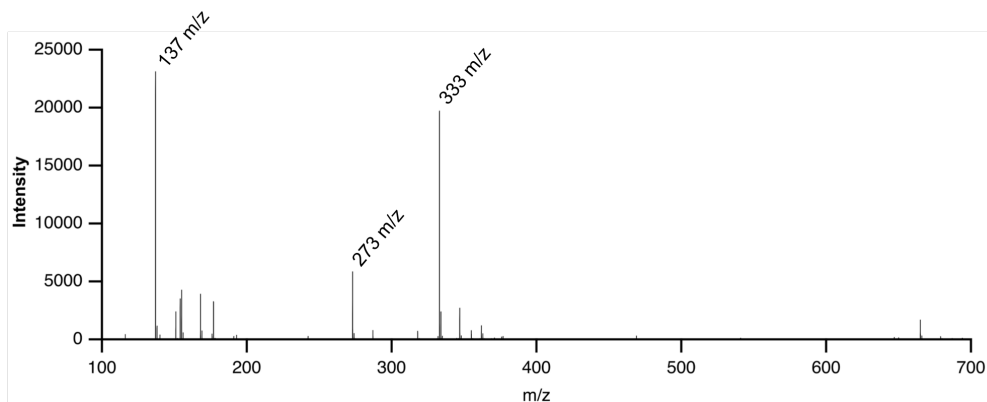

Positive ion mode MALDI-TOF mass spectrum of the SDHB matrix (9:1 (w/w) mixture of 2,5-Dihydroxybenzoic (DHB) and 2-hydroxy-5-methoxybenzoic acid).

**Figure S4**

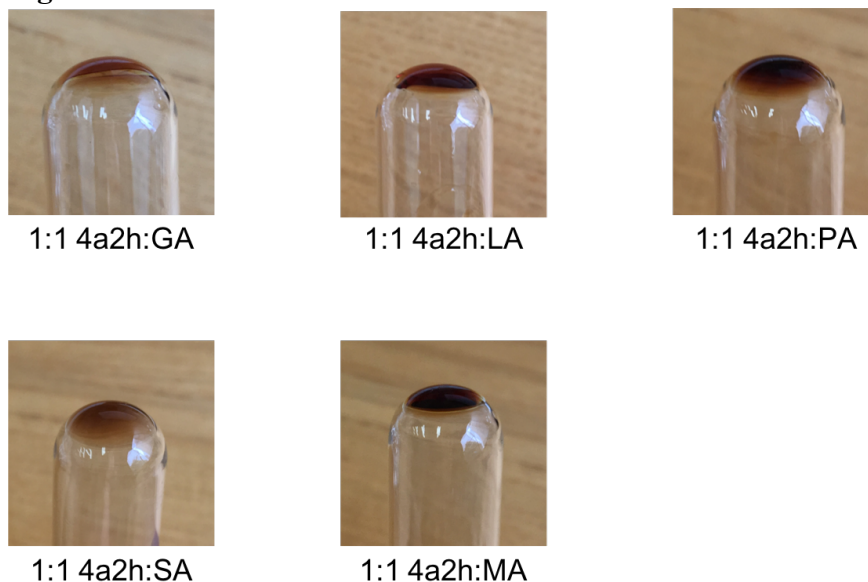

Photographs of the polymerization products of drying of 1:1 4a2h:uncharged  $\alpha$ HA solutions and a solution of an equimolar combination of all six  $\alpha$ HAs at 80°C for one week (**Fig. 1**). All samples contained 500 mM total monomer before polymerization. The brown color could be the result of products formed through degradation of the starting materials followed by melanoidin formation akin to Maillard-type reaction products or intermediates<sup>4</sup>.

**Figure S5**

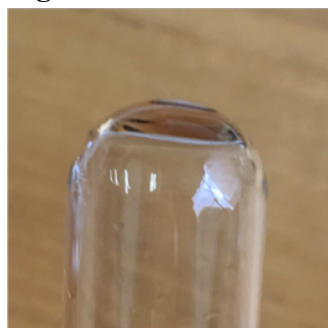

Photograph of the polymerization product of drying a solution of an equimolar combination of all six  $\alpha$ HAs (500 mM total monomer before polymerization) at 80°C for one week.

**Figure S6**

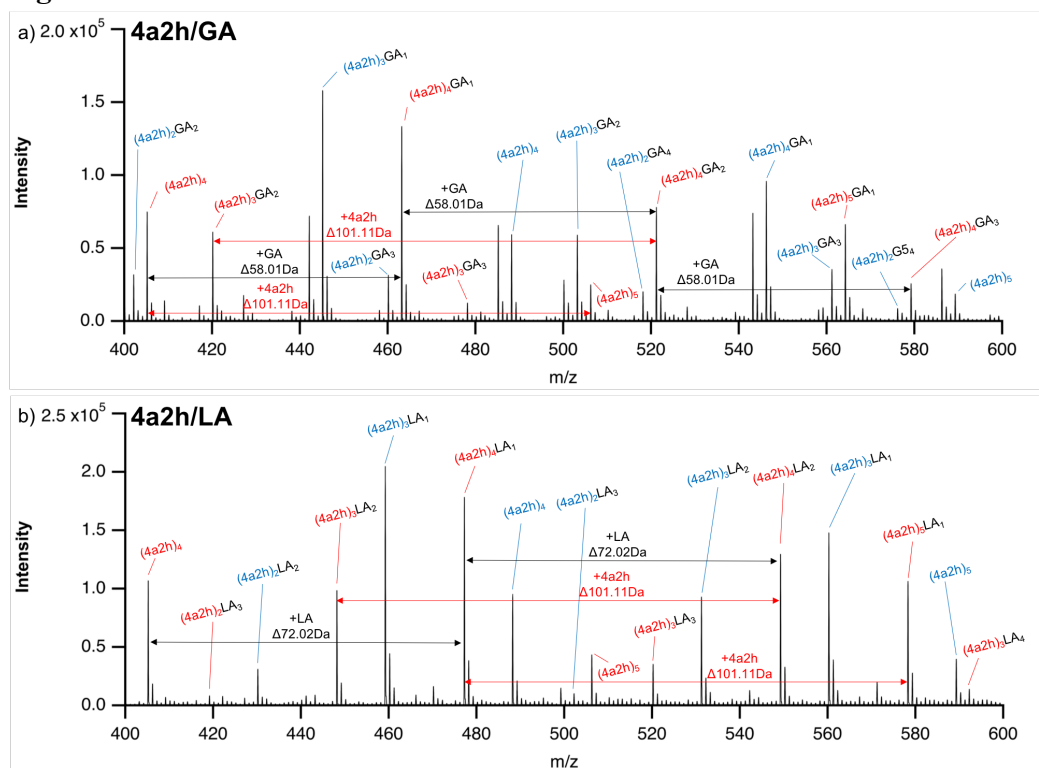

Zoomed-in positive ion mode MALDI-TOF mass spectra (400–600 m/z) of polymerization products resulting from drying of 1:1 (a) 4a2h:GA and (b) 4a2h:LA solutions (500 mM total monomer concentration) (**Fig. 2**). For ease of visualization, indicated peaks are only those which may be cyclic or dehydrated protonated species (red and black) and sodiated ethanolamine (**Fig. S10**) conjugated adducts (blue and black). Red double-sided arrows show mass difference indicative of addition of 4a2h ( $\Delta 101.11$  Da); black arrows show mass difference indicative of addition of GA ( $\Delta 58.01$  Da) or LA ( $\Delta 72.02$  Da). Peak lists: **Tables S3–S4** (4a2h/GA) and **Tables S5–S6** (4a2h/LA). For ease of interpretation, we have included a set of tables sorted by mass (**Tables S3** and **S5**), as well as a set of tables sorted first by adduct and then by mass (**Tables S4** and **S6**). The only homopolymers observed were pure 4a2h homopolymers; no non-4a2h-containing homopolymers were observed. This could be potentially due to a preference of incorporation of 4a2h into the polymer products, or the increased stability of poly(4a2h) products. While it could be theoretically possible that the 4a2h oligomers are not polyesters, but rather linear or branched polymers assembled from the formation of an amide bond between the 4a2h side chain amino group and the  $\alpha$ -hydroxy group, other similar studies did not observe such a phenomenon with 4a2h (although they observed such amide bond formation from similar polymerization of 6-amino-4-hydroxybutyric acid monomers)<sup>5</sup>. Thus, we believe that the homopolymer structures formed are likely to be polyesters, although it cannot be ruled out that poly(4a2h) peptides, depsipeptides, or even branched/hyperbranched structures were also present due to formation of amide bonds; a future study utilizing FTIR and/or NMR is planned.

**Figure S7**

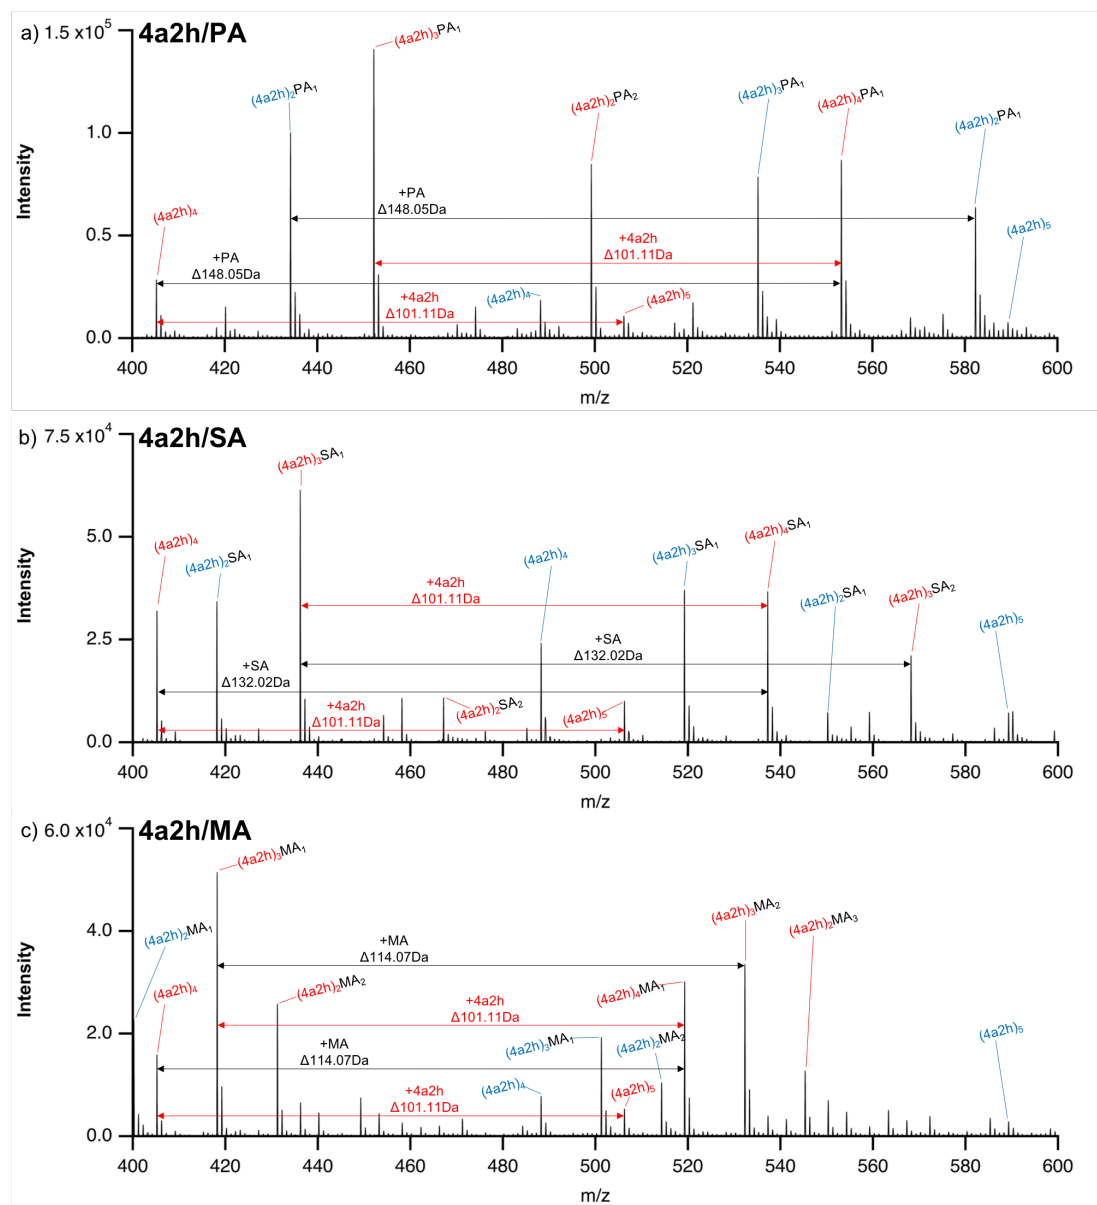

Zoomed-in positive ion mode MALDI-TOF mass spectra (400–600 m/z) of the polymerization products of complete drying of 1:1 (a) 4a2h:PA, (b) 4a2h:SA, and (c) 4a2h:MA solutions at 80°C for one week (500 mM total monomer concentration) (**Fig. 3**). For ease of visualization, indicated peaks are only those which may be cyclic or dehydrated protonated species (red and black) and sodiated ethanolamine (**Fig. S10**) conjugated adducts (blue and black). Red double-sided arrows indicate a mass difference indicative of addition of 4a2h ( $\Delta 101.11$  Da), while black arrows indicate a mass difference indicative of addition of PA ( $\Delta 148.05$  Da), SA ( $\Delta 132.02$  Da), or MA ( $\Delta 114.07$  Da). Peak lists: **Tables S7–S8** (4a2h:PA), **S9–S10** (4a2h:SA), and **S11–S12** (4a2h:MA).

**Figure S8**

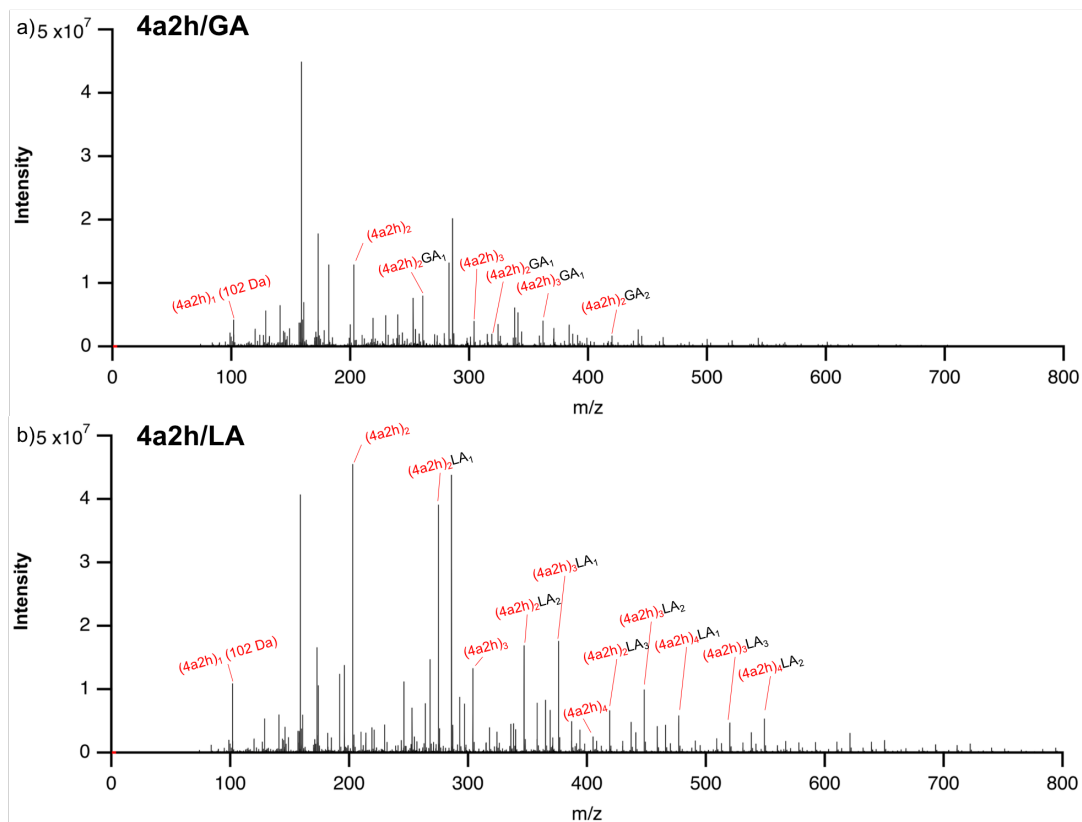

Positive ion of ESI mass spectra of polymerization products resulting from drying of (a) 1:1 4a2h:GA and (b) 4a2h:LA solutions at 500 mM total monomer concentration. Only product masses consistent with cyclic or dehydrated protonated adducts are annotated here for ease of visualization.

**Figure S9**

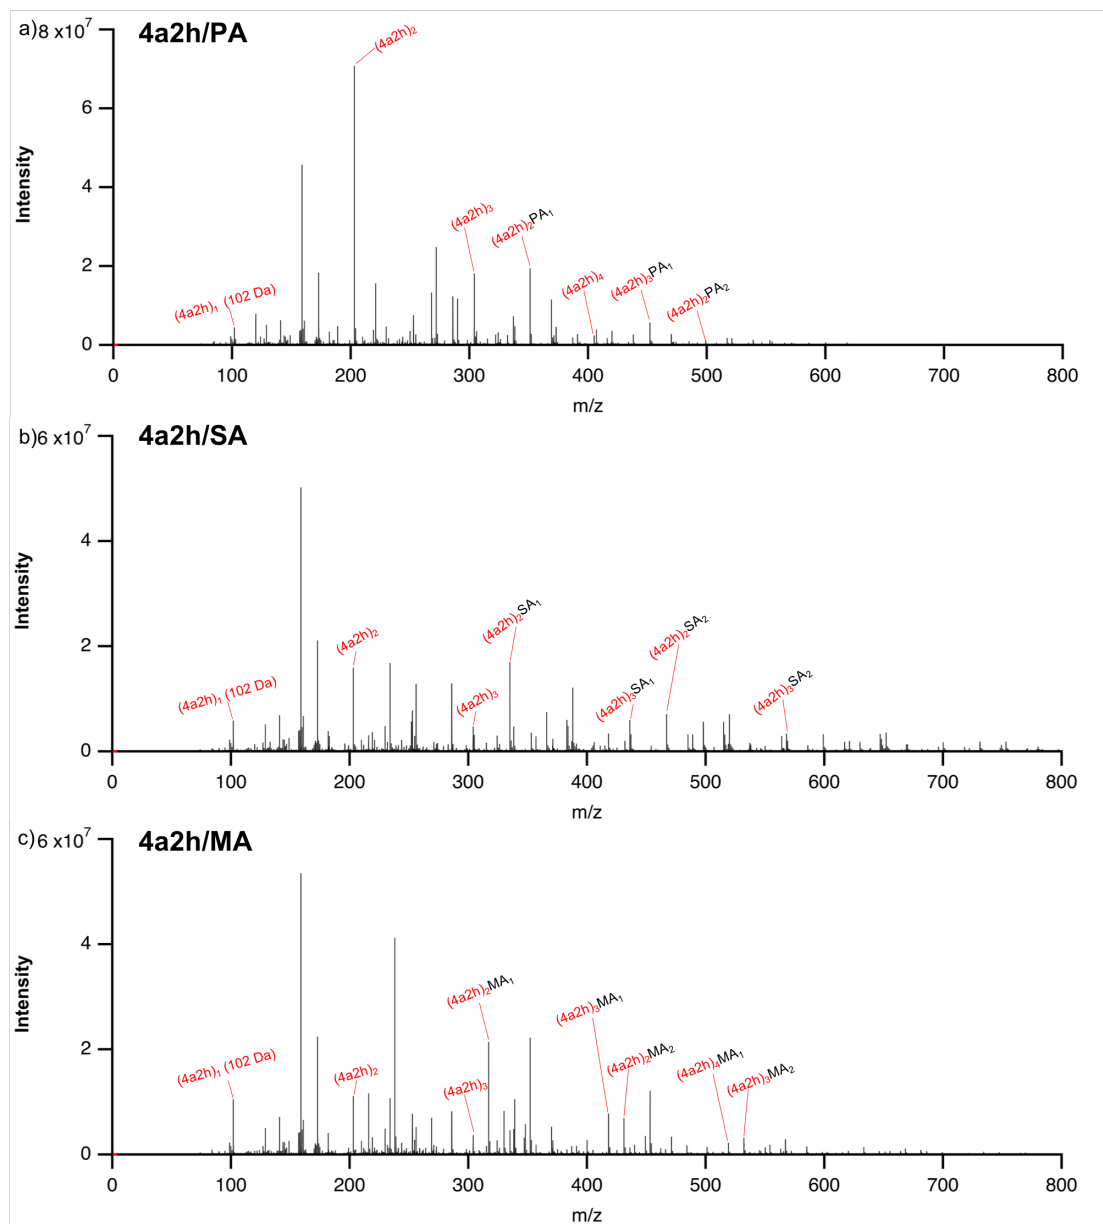

Positive ion of ESI mass spectra of polymerization products resulting from drying of (a) 1:1 4a2h:PA, (b) 4a2h:SA, and (c) 4a2h:MA solutions at 500 mM total monomer concentration. For ease of visualization, indicated peaks are only those which may be cyclic or dehydrated protonated species.

**Figure S10**

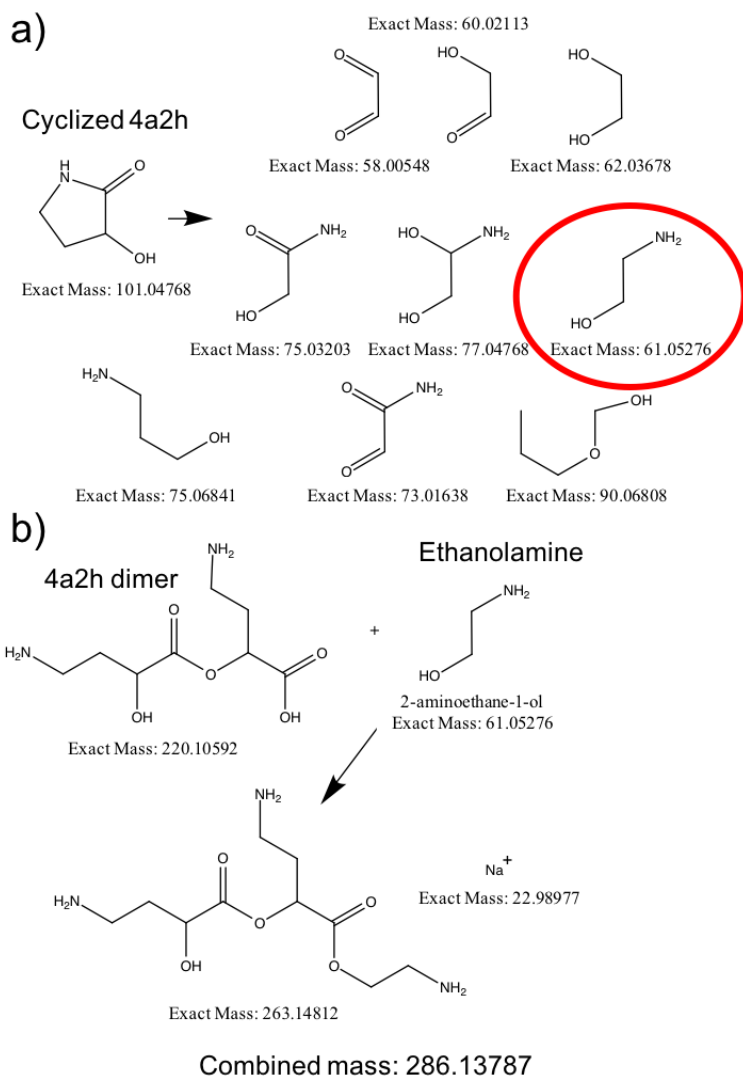

One of the peak series detected in all of the mixed samples initially reduced to monomeric additions (of 4a2h and the appropriate  $\alpha$ HA) to a  $\sim 286$  Da species. We speculate this compound to be a sodiated 4a2h oligoester dimer containing an ethanolamine conjugated to the free carboxyl group. a) Degradation of a cyclized 4a2h monomer lactam (3-hydroxypyrrolidin-2-one) ( $\sim 101$  Da detected previously in similar conditions<sup>5</sup>) into ethanolamine (and other various degradation products); this product could also have contributed to the brown coloration of the mixed sample products). b) The ethanolamine then could form an ester with the carboxyl group of a linear 4a2h ester dimer, resulting in a mass of  $\sim 286$  Da after sodiation that matches that detected in all of the mixed sample product MALDI-TOF spectra. Co-existence of a peptide, *via* nucleophilic addition of the amine moiety of ethanolamine to the C-terminus of 4a2h dimer, with the identical mass is possible. All exact masses in the figure are represented in Da.



**Figure S11**

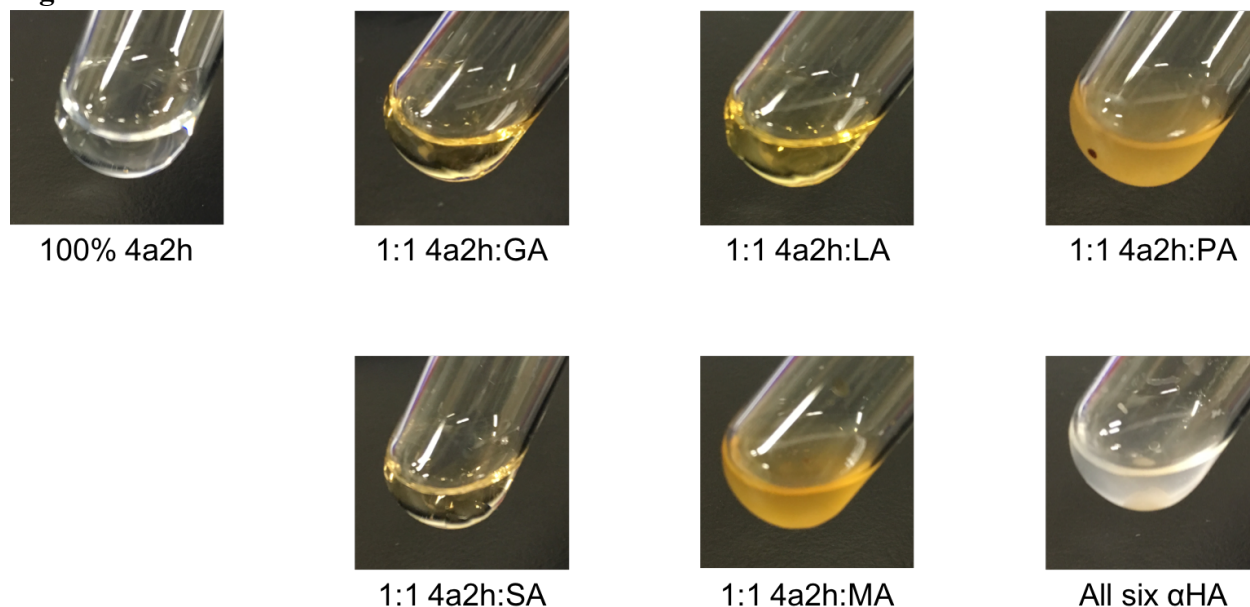

Rehydration of the dried polyester products (total of 500 mM monomer before polymerization, depicted in **Figs. S2, S3, and S5**) in 500  $\mu$ L water resulted in a range of phase separation properties, including full solubility for some samples (100% 4a2h, 1:1 4a2h:GA, 1:1 4a2h:LA, and 1:1 4a2h:SA), and formation of microdroplets for other samples (1:1 4a2h:PA, 1:1 4a2h:MA, and All six monomers).

**Figure S12**

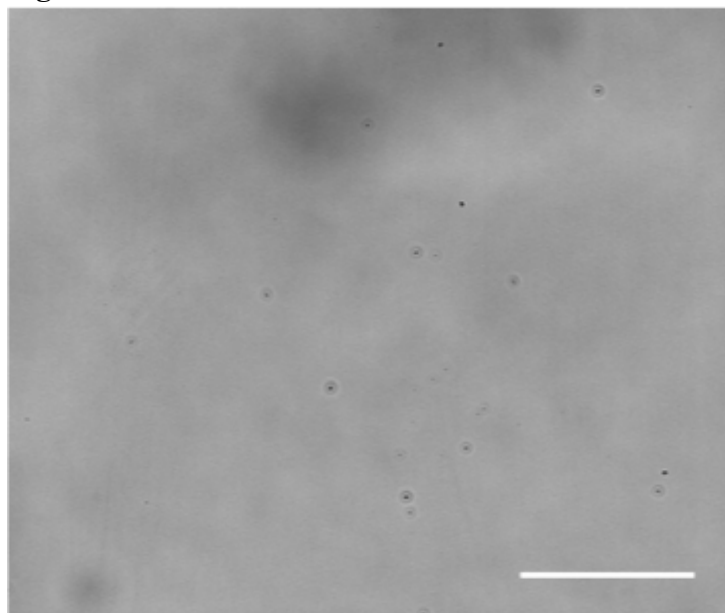

Representative optical microscopy image of a poly(4a2h) sample synthesized by drying of 500 mM 4a2h followed by rehydration. No droplets are observed (the small dots are likely impurities on the sample slide glass or objective). Scale bar is 100  $\mu\text{m}$ .

**Figure S13**

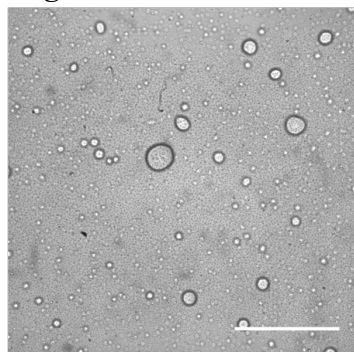

1:9 4a2h:LA

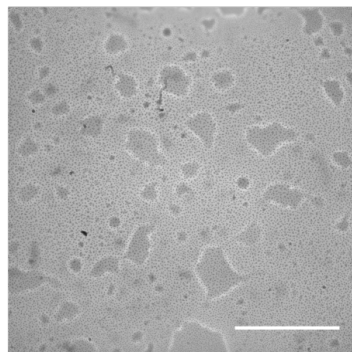

1:4 4a2h:LA

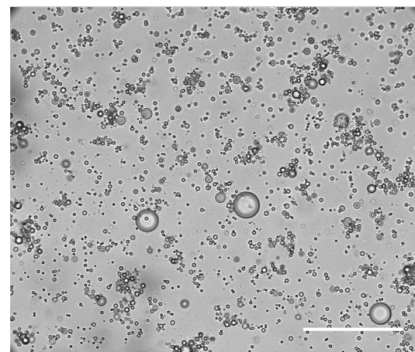

1:4 4a2h:SA

Representative optical microscopy images of samples containing 1:9 4a2h:LA, 1:4 4a2h:LA, and 1:4 4a2h:SA (500 mM total monomer concentration), followed by drying. Rehydration (in 4:1 water:acetonitrile) of 1:9 4a2h:LA and 1:4 4a2h:SA samples resulted in droplet assembly, suggesting that decreasing the ratio of 4a2h monomers in the starting mixture, followed by synthesis, can decrease the solubility of the polyester products, resulting in droplet assembly. Acetonitrile was also required to be added to the rehydration solvent, further suggesting the insolubility of the gel phase in pure water. Scale bars are 100  $\mu\text{m}$ .

**Figure S14**

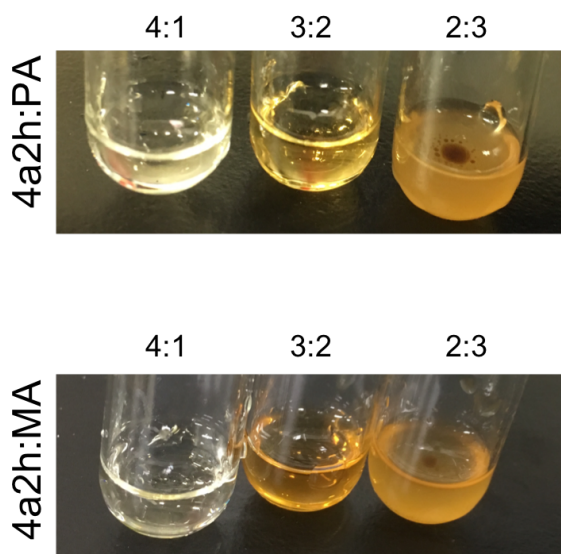

Rehydration of dried polyester products composed of varying ratios of 4a2h to PA and MA (total of 500 mM monomer before polymerization) in 500  $\mu$ L water (except for 2:3 4a2h:PA and 2:3 4a2h:MA samples, which were rehydrated in 4:1 water:acetonitrile) resulted in non-turbid solutions. This suggests that higher amounts of 4a2h incorporation, even to originally fairly apolar and insoluble polyesters, result in greater solubility of polyester products (although a some smaller droplets still form at higher 4a2h ratios). Turbid solutions formed at lower 4a2h proportions (and droplets as observed through microscopy in **Fig. 5**) suggest that droplet formation occurs readily at lower 4a2h ratios due to a decrease in solubility.

**Figure S15**

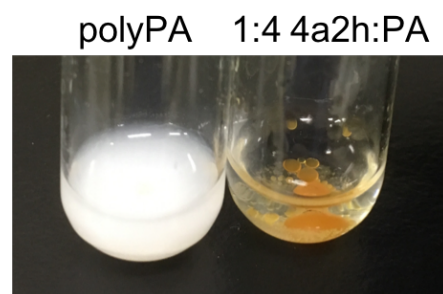

A photograph depicting rehydrated samples of polyPA and 1:4 4a2h:PA (500 mM total starting monomer concentration) after 24 hours. Droplets which contain 4a2h appear to coalesce much more quickly than those which do not contain 4a2h, as indicated by the observation of macroscopic phase separation. The brown color could be the result of products or intermediates formed through degradation of the starting materials followed by melanoidin formation akin to Maillard-type reaction products or intermediates<sup>4</sup>.

**Figure S16**

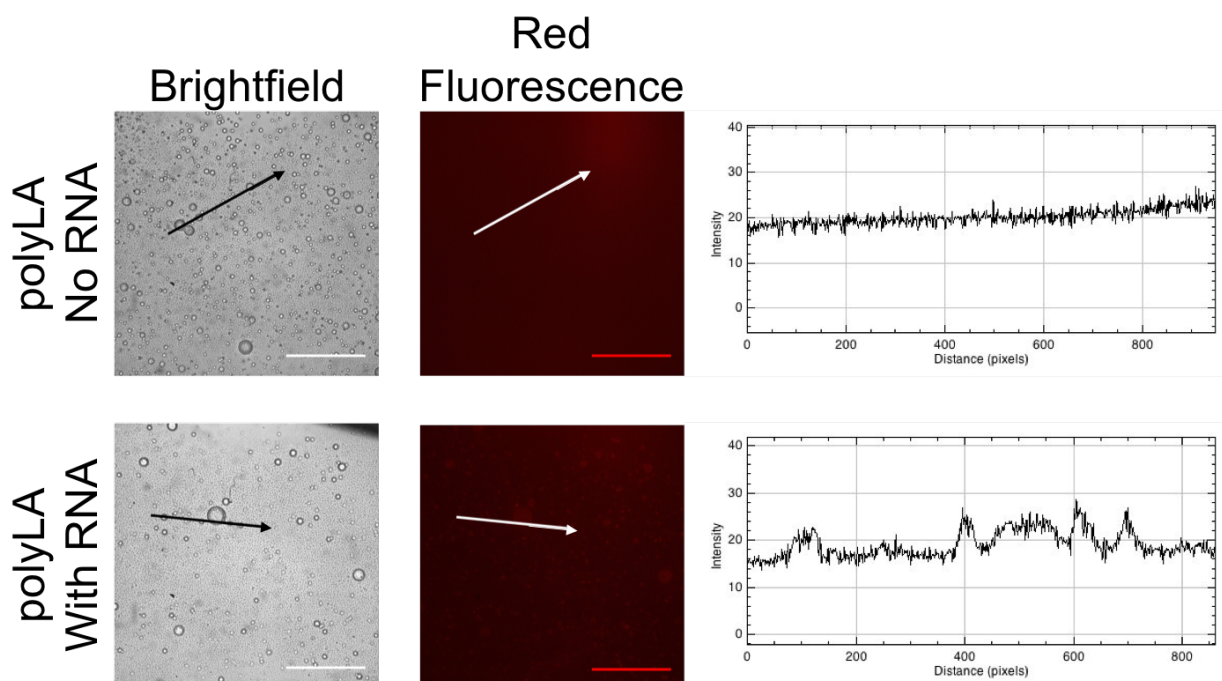

Representative brightfield (left) and fluorescence (middle) microscopy images of polyLA droplets (500 mM total monomer concentration before synthesis) with or without fluorescent RNA (5'-GCGUAGACUGACUGG-Cy3-3') in the red emission channel (585 nm emission). Kymographs depict the same region of analysis and direction for each row (in black for brightfield image and in white for fluorescence images; arrows indicate direction of analysis). PolyLA is not intrinsically fluorescent in the red channel, while the fluorescent RNA appears to segregate somewhat weakly into the polyLA droplets based on kymograph analysis (in our previous study, a fluorescein-labeled RNA 25-mer was not observed to segregate into polyLA droplets<sup>6</sup>; however, the different chemical structure of the Cy3 fluorescent tag as well as the shorter length may assist in weak segregation of fluorescent RNA into polyLA droplets in this study). Scale bars are 100  $\mu\text{m}$  (615.38 pixels). Fluorescence acquisition (excitation illumination strength and exposure time) and image processing (brightness, contrast) parameters were constant between the rows.

**Figure S17**

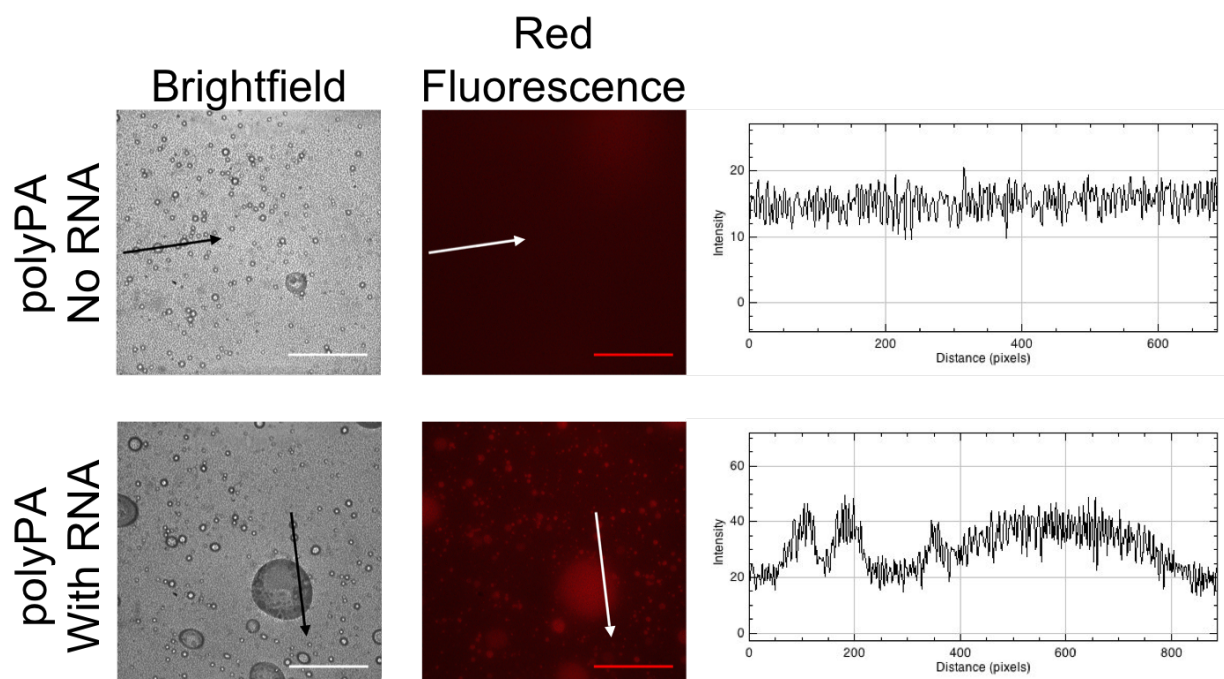

Representative brightfield (left) and fluorescence (middle) microscopy images of polyPA droplets (500 mM total monomer concentration before synthesis) with or without fluorescent RNA (5'-GCGUAGACUGACUGG-Cy3-3') in the red emission channel (585 nm emission). Kymographs depict the same region of analysis and direction for each row (in black for brightfield image and in white for fluorescence images; arrows indicate direction of analysis). PolyPA is not intrinsically fluorescent in the red channel, while kymograph analysis shows that that fluorescent RNA segregates into the polyPA droplets<sup>6</sup>. Scale bars are 100  $\mu\text{m}$  (615.38 pixels). Fluorescence acquisition (excitation illumination strength and exposure time) and image processing (brightness, contrast) parameters were constant between the rows.

**Figure S18**

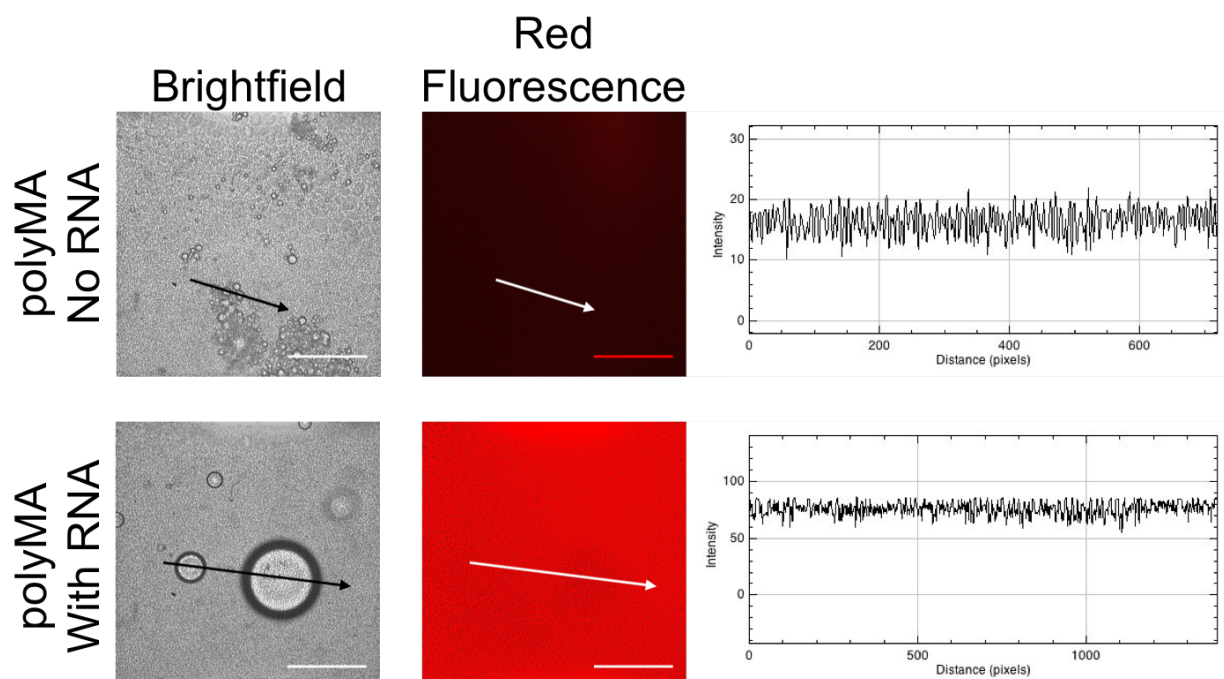

Representative brightfield (left) and fluorescence (middle) microscopy images of polyMA droplets (500 mM total monomer concentration before synthesis) with or without fluorescent RNA (5'-GCGUAGACUGACUGG-Cy3-3') in the red emission channel (585 nm emission). Kymographs depict the same region of analysis and direction for each row (in black for brightfield image and in white for fluorescence images; arrows indicate direction of analysis). PolyMA is not intrinsically fluorescent in the red channel, while kymograph analysis also shows that the fluorescent RNA does not appear to segregate into the polyMA droplets<sup>6</sup>. Scale bars are 100  $\mu\text{m}$  (615.38 pixels). Fluorescence acquisition (excitation illumination strength and exposure time) and image processing (brightness, contrast) parameters were constant between the rows.



**Figure S19**

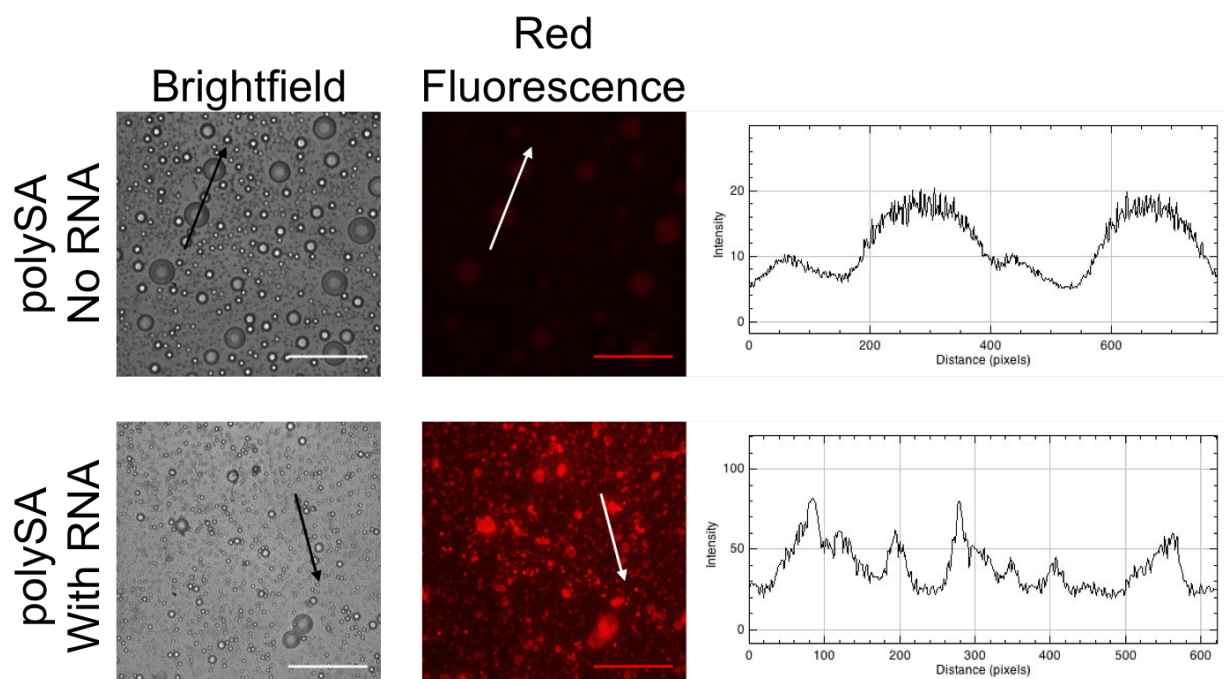

Representative brightfield (left) and fluorescence (middle) microscopy images of polySA droplets (500 mM total monomer concentration before synthesis) with or without fluorescent RNA (5'-GCGUAGACUGACUGG-Cy3-3') in the red emission channel (585 nm emission). Kymographs depict the same region of analysis and direction for each row (in black for brightfield image and in white for fluorescence images; arrows indicate direction of analysis). PolySA appears to be fluorescent in the red channel, while the images and kymograph indicate that fluorescent RNA likely segregates into the polySA droplets based on the high fluorescence intensities localized to the droplets (in our previous study, a fluorescein-labeled RNA 25-mer was not observed to segregate into polyLA droplets<sup>6</sup>; however, the different chemical structure of the Cy3 fluorescent tag as well as the shorter length may assist in weak segregation of fluorescent RNA into polySA droplets in this study). However, the intrinsic fluorescent character of polySA may contribute to some of the increase in localized droplet fluorescence intensity even in the presence of fluorescent RNA; further quantitative analyses using confocal microscopy are planned. Scale bars are 100  $\mu\text{m}$  (615.38 pixels). Fluorescence acquisition (excitation illumination strength and exposure time) and image processing (brightness, contrast) parameters were constant between the rows.

**Figure S20**

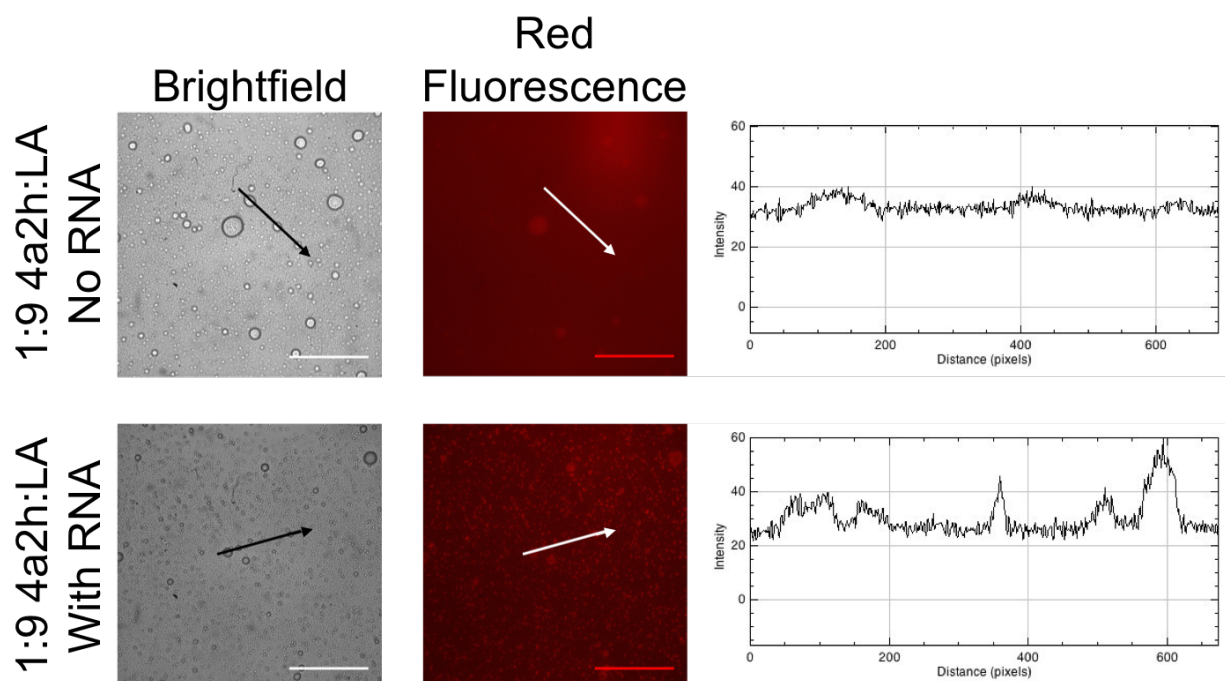

Representative brightfield (left) and fluorescence (middle) microscopy images of poly(4a2h-LA) droplets (1:9 4a2h:LA; 500 mM total monomer concentration before synthesis) with or without fluorescent RNA (5'-GCGUAGACUGACUGG-Cy3-3') in the red emission channel (585 nm emission). Kymographs depict the same region of analysis and direction for each row (in black for brightfield image and in white for fluorescence images; arrows indicate direction of analysis). poly(4a2h-LA) droplets appear slightly fluorescent in the red channel. Although the fluorescence intensities localized to some droplets in the presence of RNA are higher than some droplets in the absence of RNA (which may show the ability of these droplets to segregate RNA), the current images and analyses are inconclusive on whether fluorescent RNA can definitively segregate into the droplets. The fluorescent character of poly(4a2h-LA) may contribute to some of the increase in localized droplet fluorescence intensity even in the presence of fluorescent RNA; further quantitative analyses using confocal microscopy are required to confirm whether these droplets can segregate RNA. Due to the fact that polyLA droplets showed the ability to segregate RNA, and no appearance of significant amounts of background fluorescence (due to significant amounts of RNA in solution and not segregated within droplets), it is likely that poly(4a2h-LA) droplets can segregate fluorescent RNA. Scale bars are 100  $\mu\text{m}$  (615.38 pixels). Fluorescence acquisition (excitation illumination strength and exposure time) and image processing (brightness, contrast) parameters were constant between the rows.



**Figure S21**

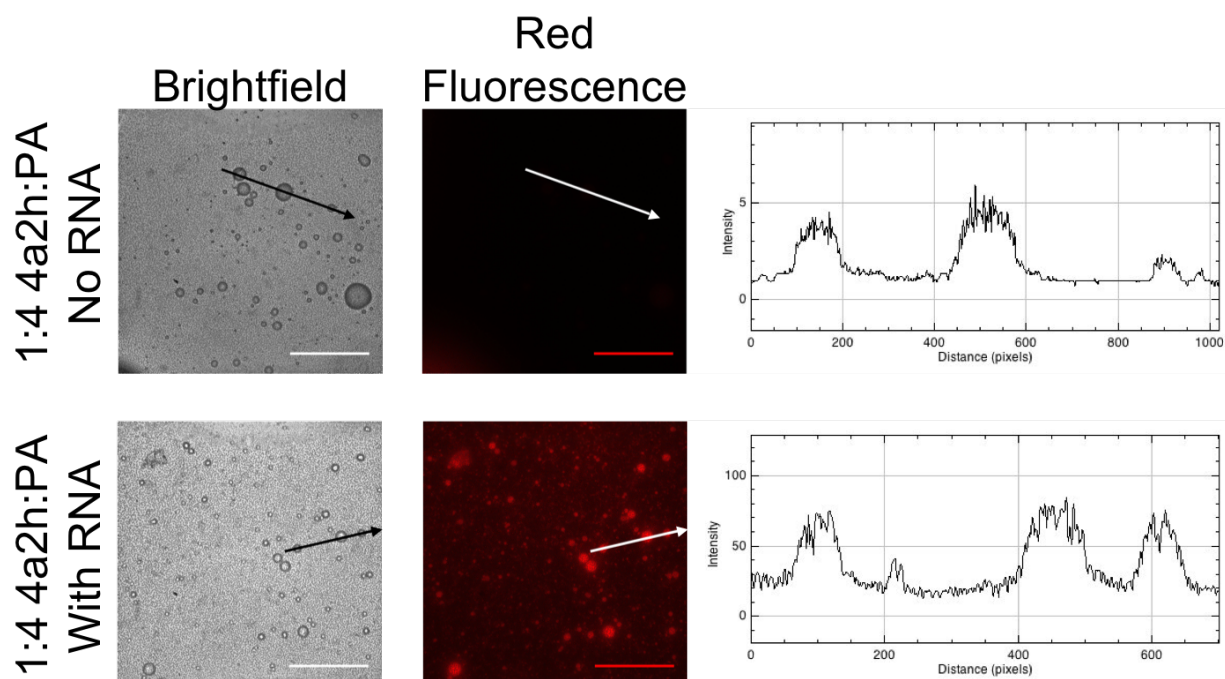

Representative brightfield (left) and fluorescence (middle) microscopy images of poly(4a2h-PA) droplets (1:4 4a2h:PA; 500 mM total monomer concentration before synthesis) with or without fluorescent RNA (5'-GCGUAGACUGACUGG-Cy3-3') in the red emission channel (585 nm emission). Kymographs depict the same region of analysis and direction for each row (in black for brightfield image and in white for fluorescence images; arrows indicate direction of analysis). poly(4a2h-PA) appears slightly fluorescent in the red channel, however the significant increase in localized fluorescence intensity to the droplets in the presence of RNA suggests that fluorescent RNA segregates strongly into the poly(4a2h-PA) droplets based on kymograph analysis. The fluorescent character of poly(4a2h-PA) may contribute to some of the increase in localized droplet fluorescence intensity even in the presence of fluorescent RNA; further quantitative analyses using confocal microscopy are planned. Scale bars are 100  $\mu\text{m}$  (615.38 pixels). Fluorescence acquisition (excitation illumination strength and exposure time) and image processing (brightness, contrast) parameters were constant between the rows.

**Figure S22**

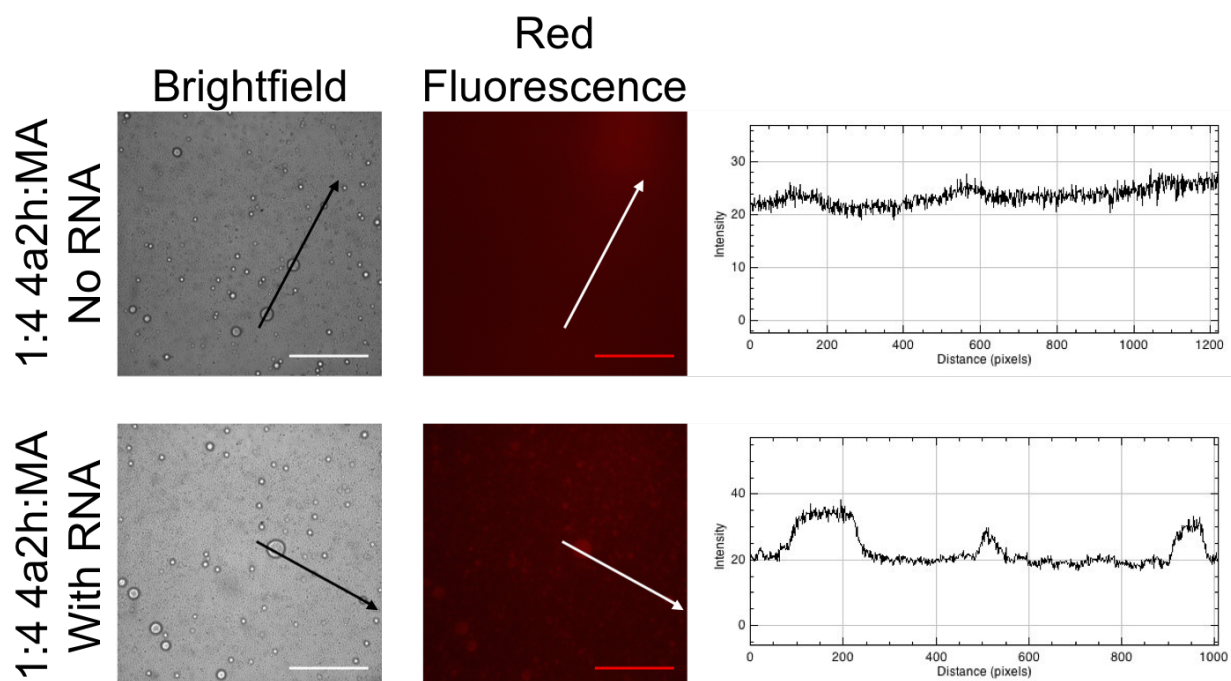

Representative brightfield (left) and fluorescence (middle) microscopy images of poly(4a2h-MA) droplets (1:4 4a2h:MA; 500 mM total monomer concentration before synthesis) with or without fluorescent RNA (5'-GCGUAGACUGACUGG-Cy3-3') in the red emission channel (585 nm emission). Kymographs depict the same region of analysis and direction for each row (in black for brightfield image and in white for fluorescence images; arrows indicate direction of analysis). poly(4a2h-MA) appears intrinsically slightly fluorescent in the red channel. However, kymograph analysis suggests that fluorescent RNA does indeed segregate within the poly(4a2h-MA) droplets. The fluorescent intensity localized to droplets (and the fluorescence intensity increase compared to the background) is greater in the presence of RNA. Scale bars are 100  $\mu\text{m}$  (615.38 pixels). Fluorescence acquisition (excitation illumination strength and exposure time) and image processing (brightness, contrast) parameters were constant between the rows.

**Figure S23**

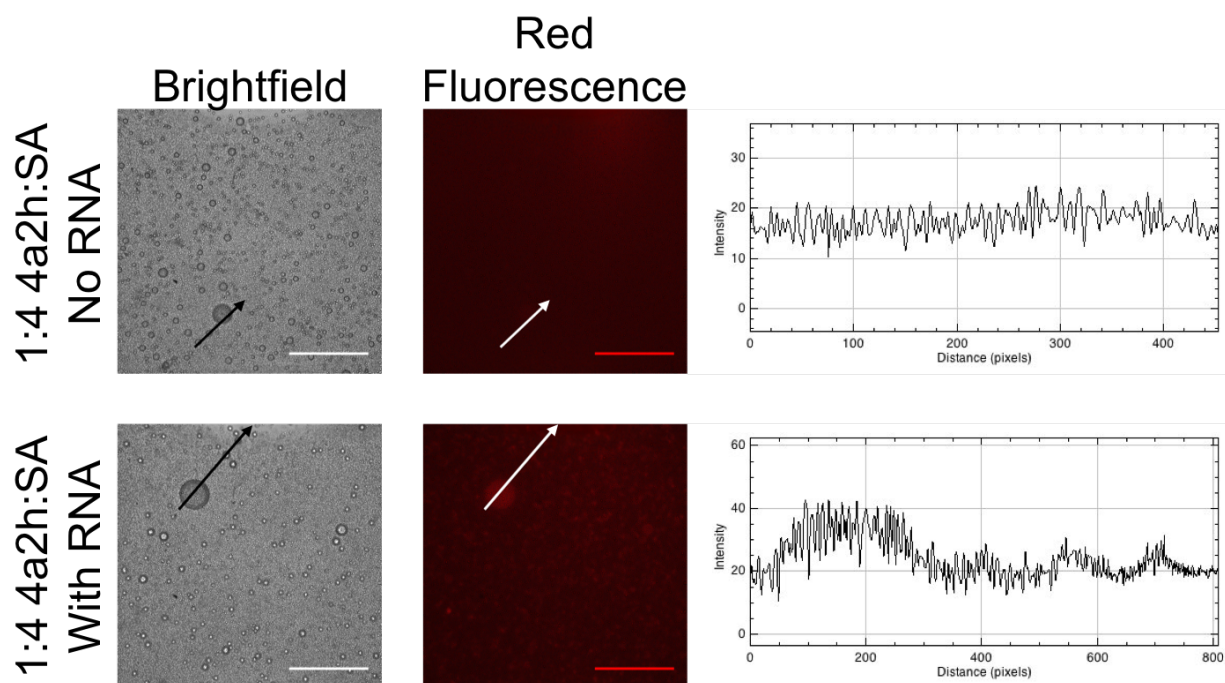

Representative brightfield (left) and fluorescence (middle) microscopy images of poly(4a2h-SA) droplets (1:4 4a2h:SA; 500 mM total monomer concentration before synthesis) with or without fluorescent RNA (5'-GCGUAGACUGACUGG-Cy3-3') in the red emission channel (585 nm emission). Kymographs depict the same region of analysis and direction for each row (in black for brightfield image and in white for fluorescence images; arrows indicate direction of analysis). poly(4a2h-SA) may be intrinsically slightly fluorescent, but kymograph analysis suggests that fluorescent RNA clearly segregates to the poly(4a2h-SA) droplets. Scale bars are 100  $\mu\text{m}$  (615.38 pixels). Fluorescence acquisition (excitation illumination strength and exposure time) and image processing (brightness, contrast) parameters were constant between the rows.

**Figure S24**

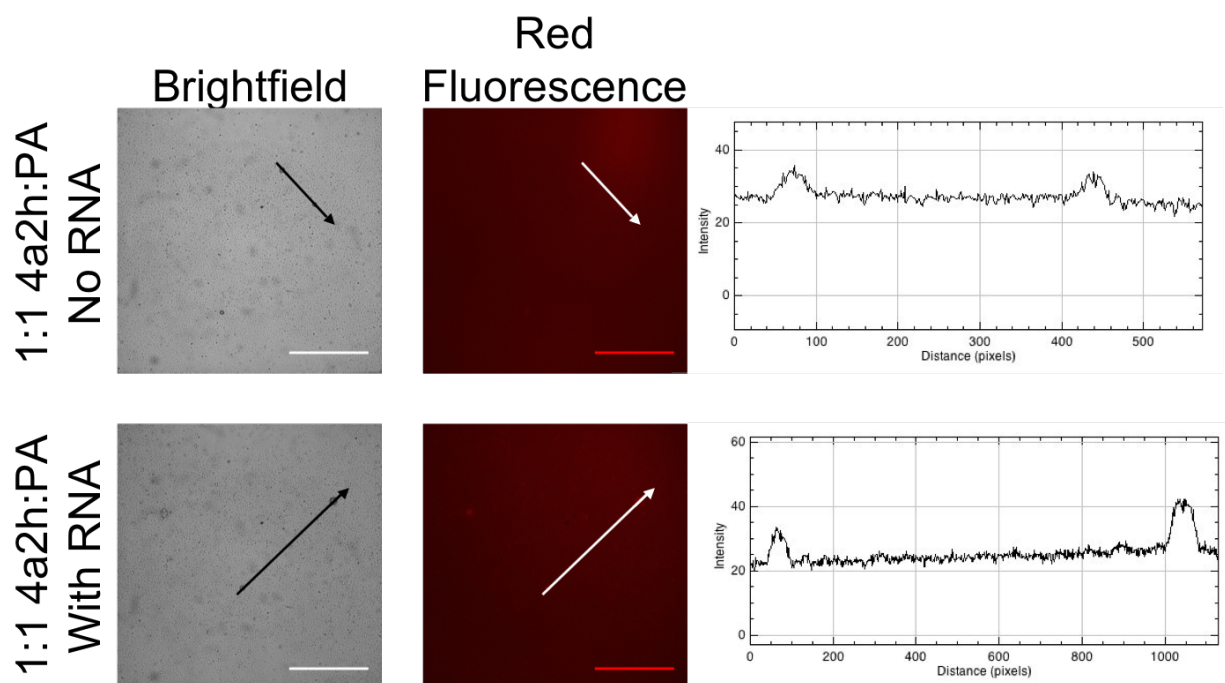

Representative brightfield (left) and fluorescence (middle) microscopy images of poly(4a2h-PA) droplets (1:1 4a2h:PA; 500 mM total monomer concentration before synthesis) with or without fluorescent RNA (5'-GCGUAGACUGACUGG-Cy3-3') in the red emission channel (585 nm emission). Kymographs depict the same region of analysis and direction for each row (in black for brightfield image and in white for fluorescence images; arrows indicate direction of analysis). poly(4a2h-PA) droplets appear to be intrinsically slightly fluorescent in the red channel, and although there is some localized fluorescence intensity to the droplets in the presence of fluorescent, RNA, kymograph analysis is inconclusive as to whether these droplets retain the ability to segregate fluorescent RNA upon increasing the 4a2h:PA ratio to 1:1. In particular, the fluorescence intensity localized to the droplets is less compared to poly(4a2h-PA) droplets prepared with a 4a2h:PA ratio of 1:4. However, more quantitative studies, such as with confocal microscopy, are required to confirm whether these droplets can segregate RNA or not. Scale bars are 100  $\mu\text{m}$  (615.38 pixels). Fluorescence acquisition (excitation illumination strength and exposure time) and image processing (brightness, contrast) parameters were constant between the rows.

**Figure S25**

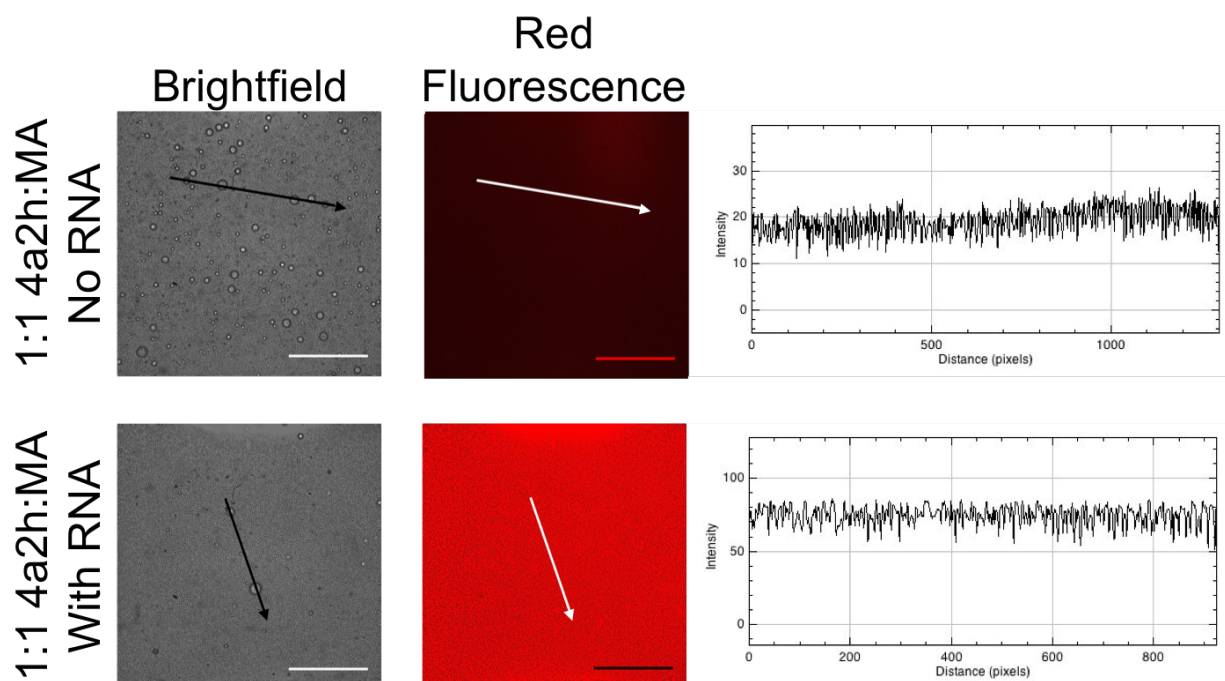

Representative brightfield (left) and fluorescence (middle) microscopy images of poly(4a2h-MA) droplets (1:1 4a2h:MA; 500 mM total monomer concentration before synthesis) with or without fluorescent RNA (5'-GCGUAGACUGACUGG-Cy3-3') in the red emission channel (585 nm emission). Kymographs depict the same region of analysis and direction for each row (in black for brightfield image and in white for fluorescence images; arrows indicate direction of analysis). poly(4a2h-MA) droplets do not appear to be intrinsically fluorescent in the red channel. However, the fluorescence intensity in the presence of RNA is not localized to any droplets, suggesting that the ability to segregate fluorescent RNA may have been lost upon increasing the 4a2h:MA ratio to 1:1. Scale bars are 100  $\mu\text{m}$  (615.38 pixels). Fluorescence acquisition (excitation illumination strength and exposure time) and image processing (brightness, contrast) parameters were constant between the rows.

**Figure S26**

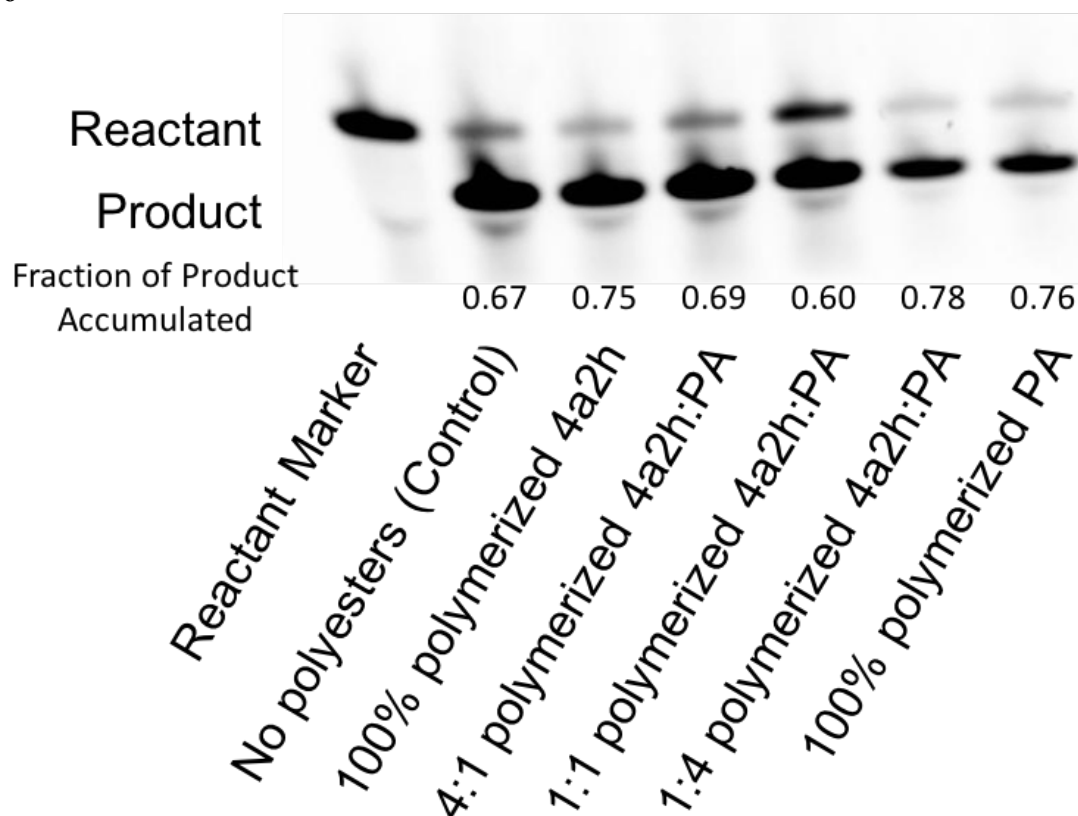

An overnight self-cleaving hammerhead ribozyme reaction was performed under a variety of conditions (4  $\mu$ M HH1, 6  $\mu$ M HH2, 200 mM MES pH 5.7, 100 mM  $\text{MgCl}_2$ ) including in the various ratios of 4a2h:PA-containing polyester systems and polymerized pure poly(4a2h) and polyPA (the identical ribozyme reaction was observed to occur in the presence of polyPA previously<sup>6</sup>). The fraction of product accumulated for each of the hammerhead ribozyme reactions is presented above each respective lane. The representative gel-shift assay indicates that the reaction (fluorescent starting material band above, and fluorescent product band below) occurred under all conditions tested, suggesting that the presence of polyester samples (poly(4a2h), polyPA, and poly(4a2h-PA) with different 4a2h:PA ratios) does not completely inhibit the reaction from occurring.



**Figure S27**

|                                 | <b>No Polyesters<br/>(Control)</b> | <b>1:4 polymerized<br/>4a2h:PA</b> | <b>100% polymerized PA</b> |
|---------------------------------|------------------------------------|------------------------------------|----------------------------|
| Fraction of Product Accumulated | 0.68 ± 0.04                        | 0.61 ± 0.10                        | 0.54 ± 0.12                |

The mean and the standard error to the mean ( $n = 4$ ) of the fraction of product accumulated for hammerhead ribozyme reactions without polyesters and in the presence of poly(4a2h-PA) (1:4 4a2h:PA ratio) and polyPA. The gel-shift assay indicates that the amount of product that accumulated in the presence of poly(4a2h-PA) (1:4 4a2h:PA ratio) was similar to that in the absence of any polyesters as well as that of polyPA (within error). This suggests that 4a2h-containing polyesters do not result in complete inhibition of the self-cleavage function of the hammerhead ribozyme, although we cannot make any statements about the potential inhibition of the reaction rate by polyesters (this study was an endpoint measurement and not a kinetic study). However, as this experiment was conducted on only one specific, simple ribozyme system, further studies regarding activity of other functional RNA (such as ribozyme-catalyzed nucleic acid ligation or nonenzymatic polymerization) within polyester microdroplet systems are still warranted to determine global patterns of RNA function in polyester microdroplets.

**Figure S28**

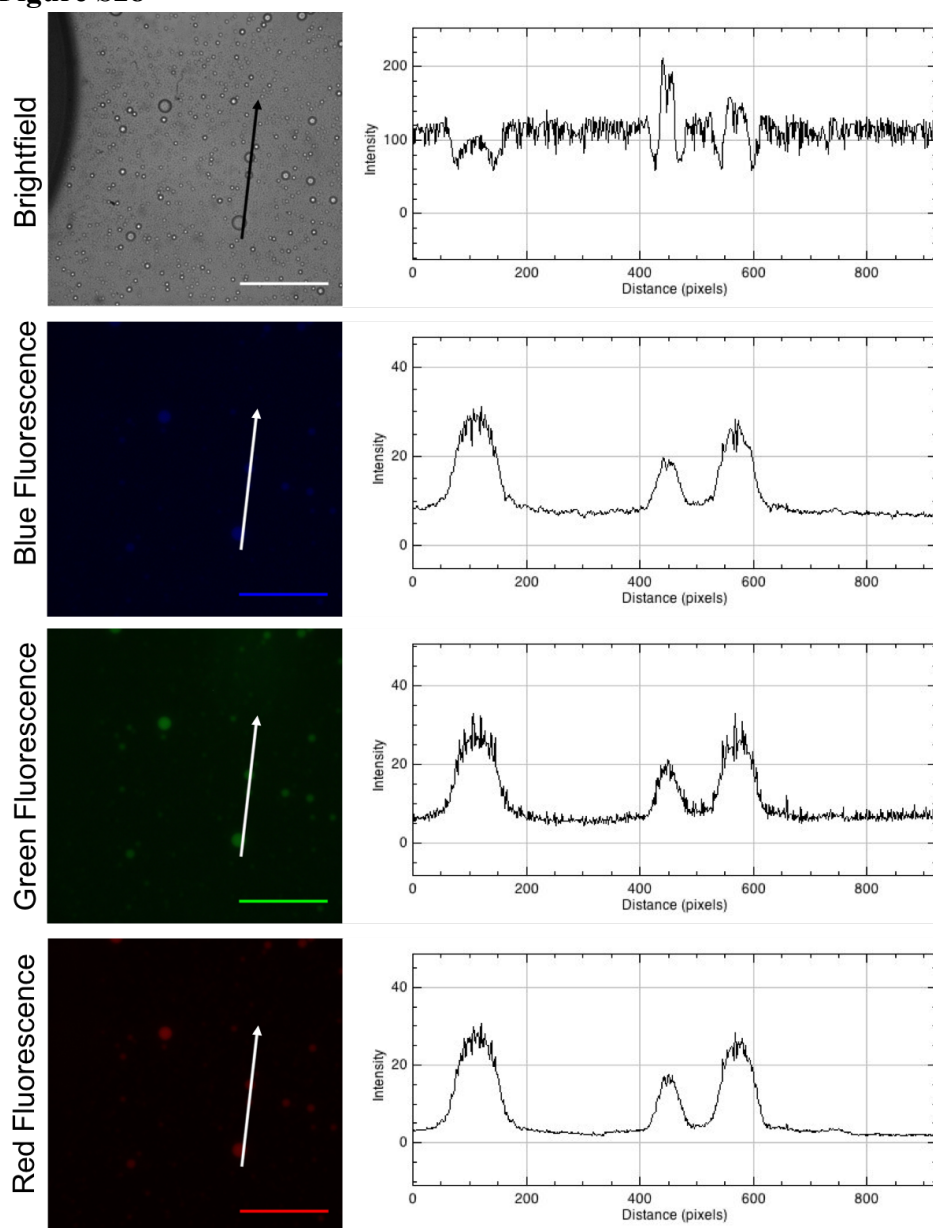

Representative brightfield and fluorescence microscopy images of poly(4a2h-LA) droplets (1:9 4a2h:LA; 500 mM total monomer concentration before synthesis) in blue (470 nm emission), green (527 nm emission), and red (585 nm emission) channels with accompanying kymographs. The region and direction of analysis for each image were identical (in black for brightfield image and in white for fluorescence images; arrows indicate direction of analysis). The column represents a single sample. poly(4a2h-LA) droplets may show intrinsic fluorescence in all channels. Scale bars are 100  $\mu\text{m}$  (615.38 pixels). Fluorescence acquisition (excitation illumination strength and exposure time) and image processing (contrast, brightness) parameters were constant down each column.



**Figure S29**

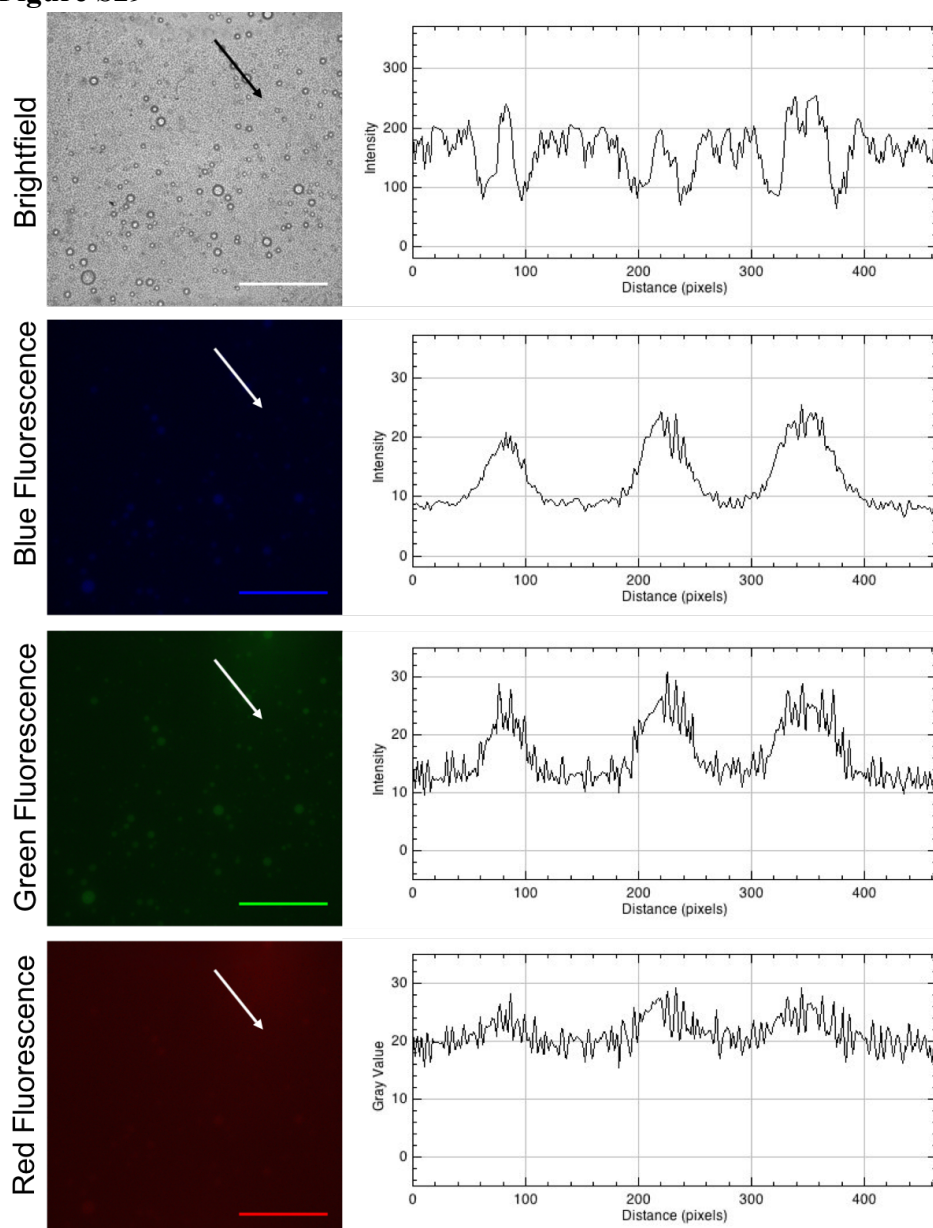

Representative brightfield and fluorescence microscopy images of poly(4a2h-PA) droplets (1:4 4a2h:PA; 500 mM total monomer concentration before synthesis) in blue (470 nm emission), green (527 nm emission), and red (585 nm emission) channels with accompanying kymographs. The region and direction of analysis for each image were identical (in black for brightfield image and in white for fluorescence images; arrows indicate direction of analysis). The column represents a single sample. poly(4a2h-PA) droplets may show intrinsic fluorescence in all channels, although the intensities may be variable. Scale bars are 100  $\mu\text{m}$  (615.38 pixels). Fluorescence acquisition (excitation illumination strength and exposure time) and image processing (contrast, brightness) parameters were constant down each column.

**Figure S30**

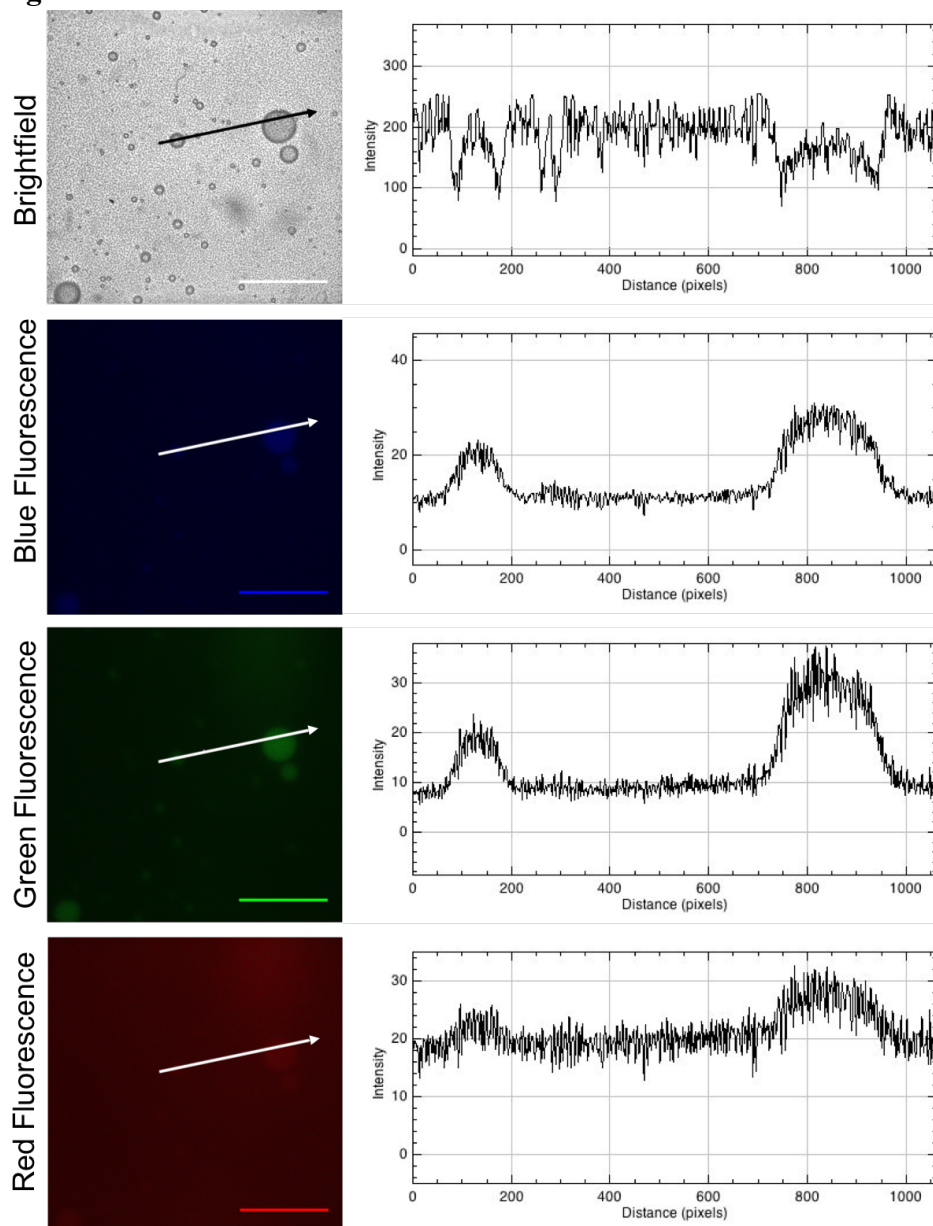

Representative brightfield and fluorescence microscopy images of poly(4a2h-MA) droplets (1:4 4a2h:MA; 500 mM total monomer concentration before synthesis) in blue (470 nm emission), green (527 nm emission), and red (585 nm emission) channels with accompanying kymographs. The region and direction of analysis for each image were identical (in black for brightfield image and in white for fluorescence images; arrows indicate direction of analysis). The column represents a single sample. poly(4a2h-MA) droplets may show intrinsic fluorescence in all channels, although the intensities may be variable. Scale bars are 100  $\mu\text{m}$  (615.38 pixels). Fluorescence acquisition (excitation illumination strength and exposure time) and image processing (contrast, brightness) parameters were constant down each column.

**Figure S31**

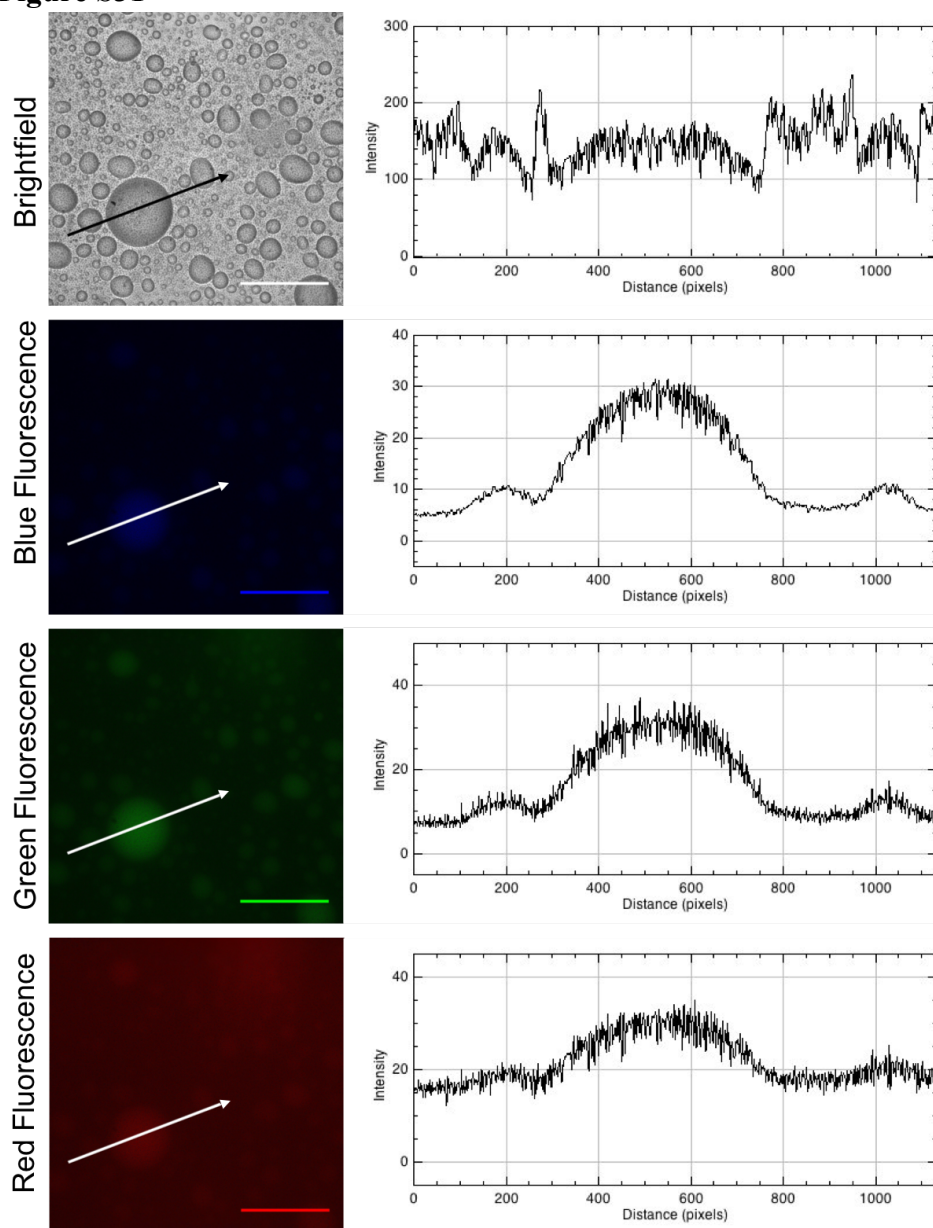

Representative brightfield and fluorescence microscopy images of poly(4a2h-SA) droplets (1:4 4a2h:SA; 500 mM total monomer concentration before synthesis) in blue (470 nm emission), green (527 nm emission), and red (585 nm emission) channels with accompanying kymographs. The region and direction of analysis for each image were identical (in black for brightfield image and in white for fluorescence images; arrows indicate direction of analysis). The column represents a single sample. poly(4a2h-SA) droplets may show intrinsic fluorescence in all channels, although the intensities may be variable. Scale bars are 100  $\mu\text{m}$  (615.38 pixels). Fluorescence acquisition (excitation illumination strength and exposure time) and image processing (contrast, brightness) parameters were constant down each column.

**Figure S32**

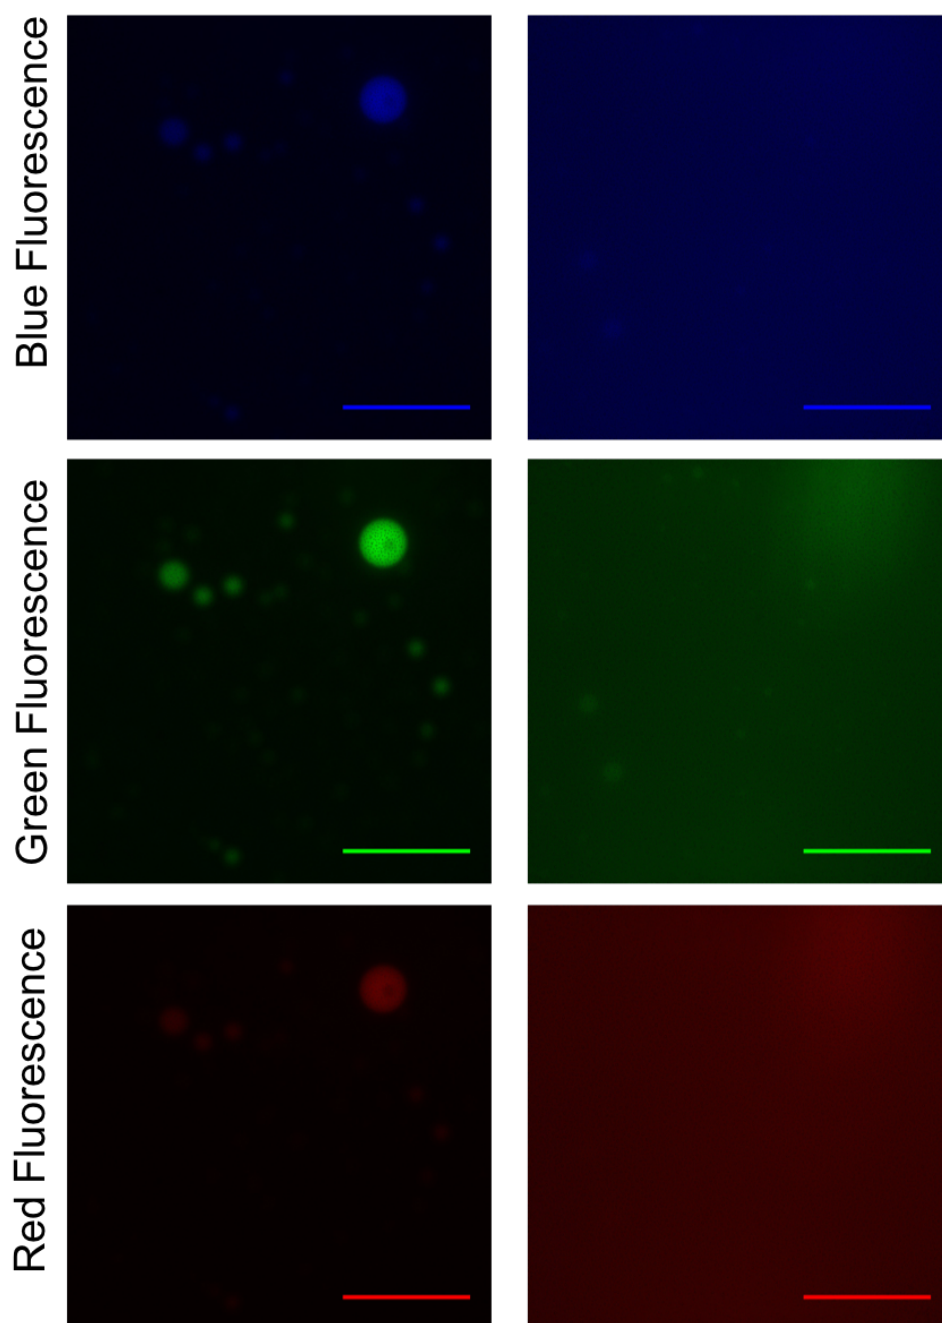

Additional fluorescence microscopy images of poly(4a2h-LA) droplets (1:9 4a2h:LA; 500 mM total monomer concentration before synthesis) in all emission channels. Each column represents a single sample. We observed some variability in the intrinsic fluorescence, and further detailed investigations are planned. Scale bars are 100  $\mu\text{m}$ . Fluorescence acquisition (excitation illumination strength and exposure time) and image processing (brightness, contrast) parameters were constant down each column.



**Figure S33**

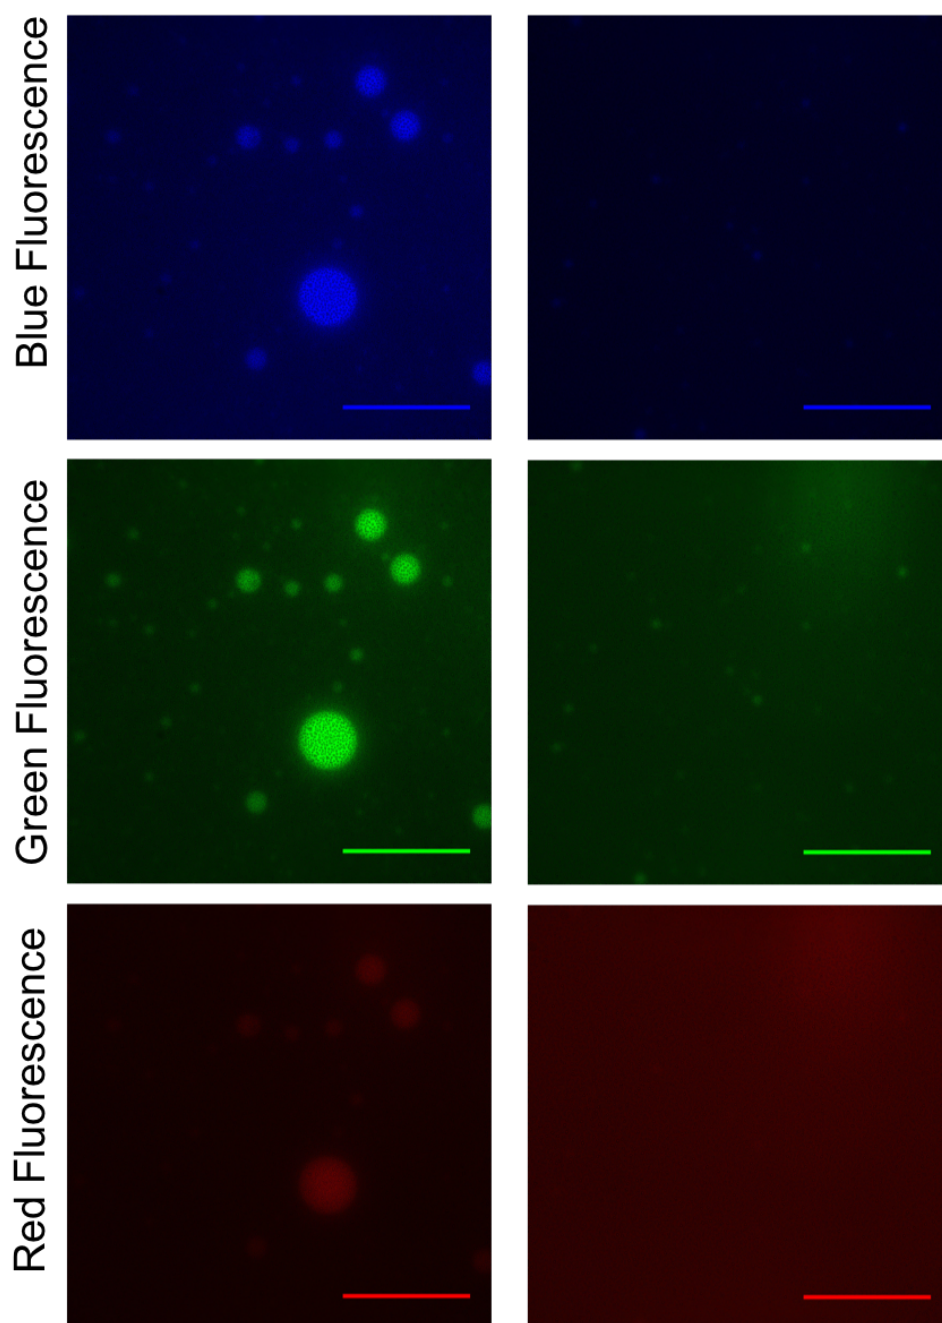

Additional fluorescence microscopy images of poly(4a2h-PA) droplets (1:4 4a2h:PA; 500 mM total monomer concentration before synthesis) in all emission channels. Each column represents a single sample. We observed some variability in the intrinsic fluorescence, and further detailed investigations are planned. Scale bars are 100  $\mu\text{m}$ . Fluorescence acquisition (excitation illumination strength and exposure time) and image processing (brightness, contrast) parameters were constant down each column.

Figure S34

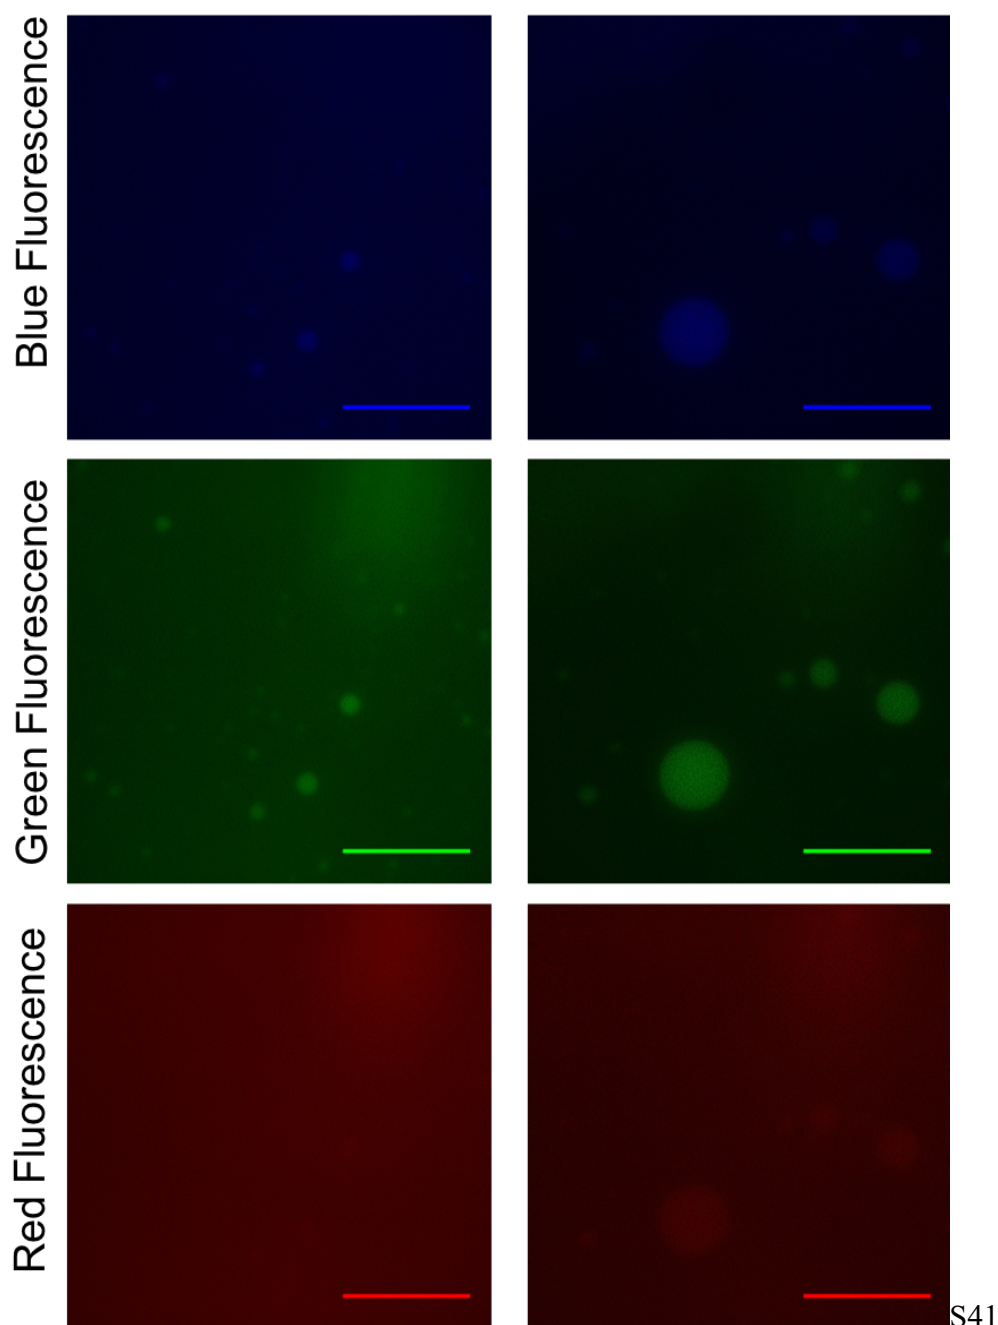

Additional fluorescence microscopy images of poly(4a2h-MA) droplets (1:4 4a2h:MA; 500 mM total monomer concentration before synthesis) in all emission channels. Each column represents a single sample. We observed some variability in the intrinsic fluorescence, and further detailed investigations are planned. Scale bars are 100  $\mu\text{m}$ . Fluorescence acquisition (excitation illumination strength and exposure time) and image processing (brightness, contrast) parameters were constant down each column.

**Figure S35**

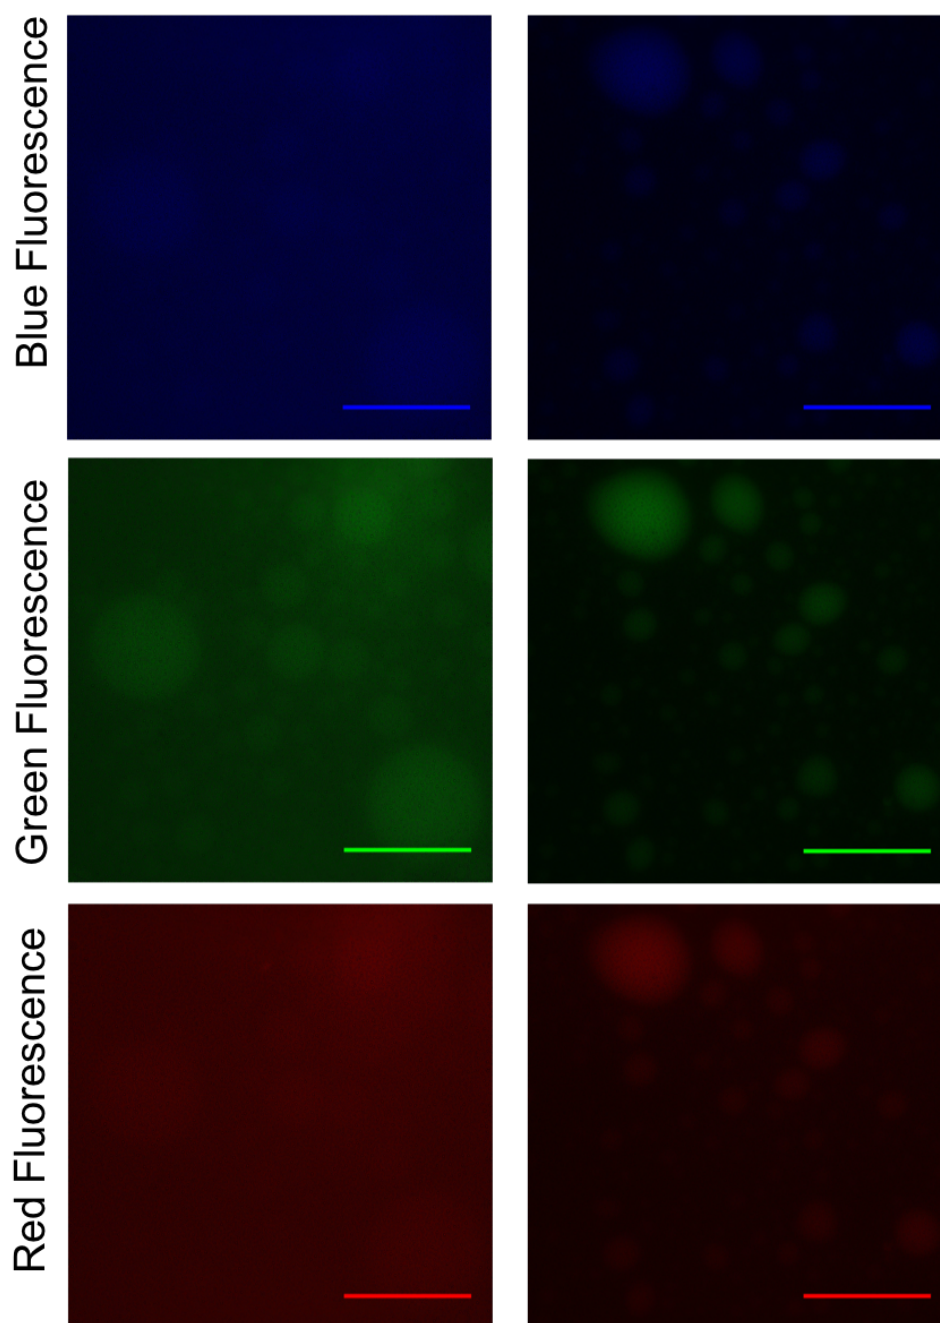

Additional fluorescence microscopy images of poly(4a2h-SA) droplets (1:4 4a2h:SA; 500 mM total monomer concentration before synthesis) in all emission channels. Each column represents a single sample. We observed some variability in the intrinsic fluorescence, and further detailed investigations are planned. Scale bars are 100  $\mu\text{m}$ . Fluorescence acquisition (excitation illumination strength and exposure time) and image processing (brightness, contrast) parameters were constant down each column.



**Figure S36**

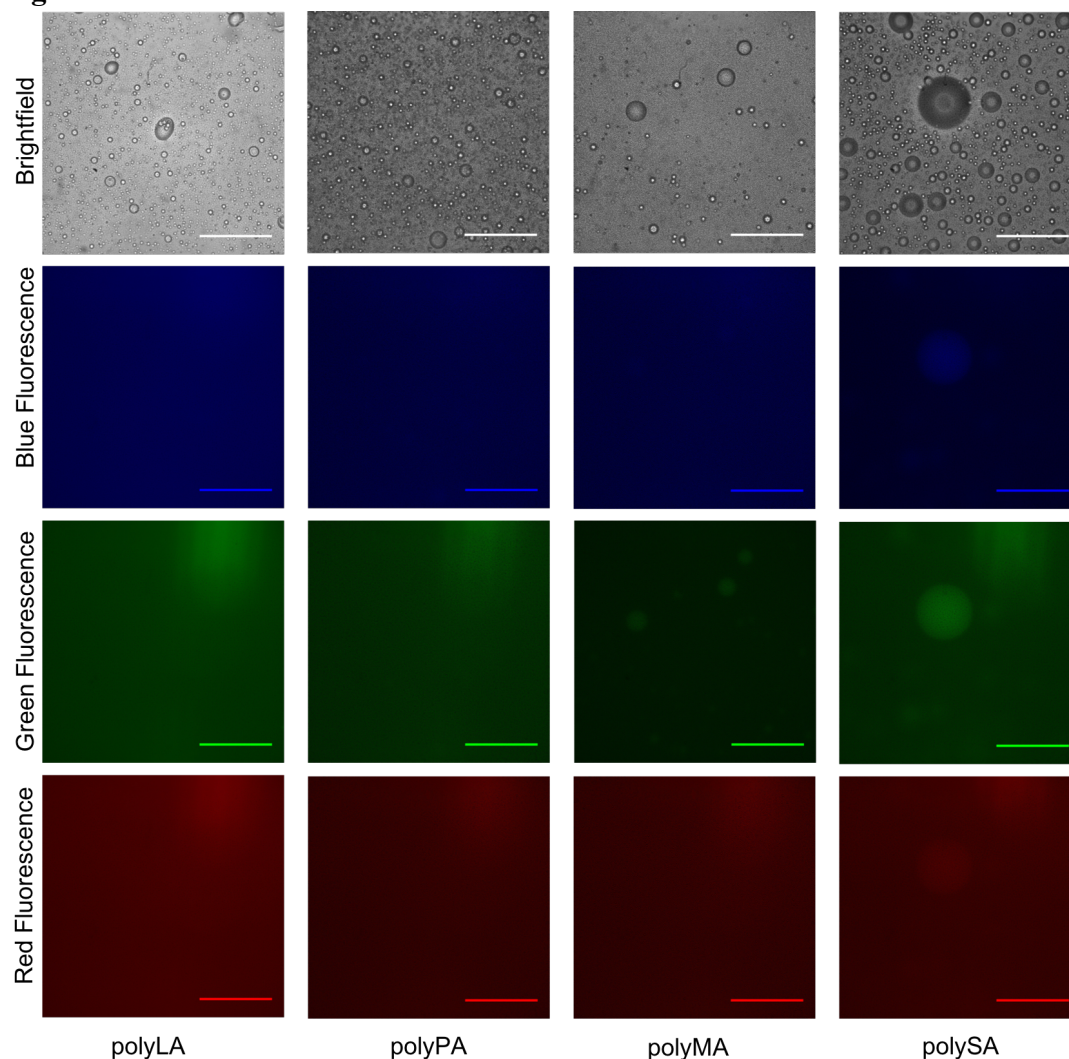

Representative brightfield and fluorescence microscopy images of homopolyester droplets in blue (470 nm emission), green (527 nm emission), and red (585 nm emission) channels. Each column represents a single sample. While polyMA and polySA show slight intrinsic fluorescence in one or more channels (**Figs. S36–S38**), polyLA and polyPA show little to no fluorescence (**Figs. S39–S40**). This suggests that incorporation of 4a2h into polyLA or polyPA systems may convey the emergence of fluorescent properties within 4a2h-containing heteropolyester droplets observed in **Figure 8**. Incorporation of 4a2h into the polyMA system in particular may expand the type of fluorescence exhibited, as potentially stronger blue fluorescence was observed (in addition to the green fluorescence originally observed in polyMA) in the poly(4a2h-MA) system (**Figs. 8 and S34**). Scale bars are 100  $\mu\text{m}$ . Fluorescence acquisition (excitation illumination strength and exposure time) and image processing (brightness, contrast) parameters were constant down each column.



**Figure S37**

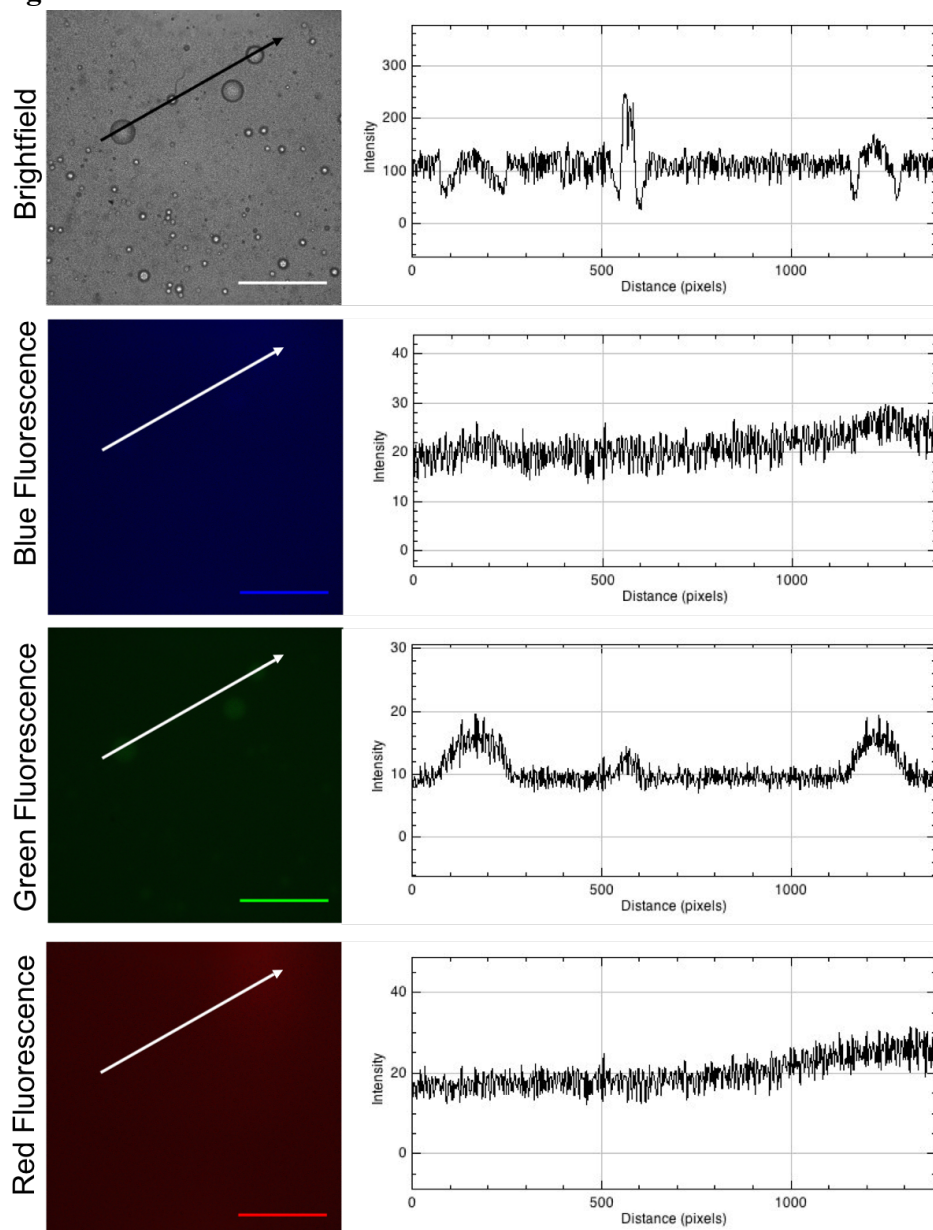

Representative brightfield and fluorescence microscopy images of polyMA droplets in blue (470 nm emission), green (527 nm emission), and red (585 nm emission) channels with accompanying kymographs. The region and direction of analysis for each image were identical (in black for brightfield image and in white for fluorescence images; arrows indicate direction of analysis). The column represents a single sample. polyMA apparently shows some intrinsic fluorescence (especially green fluorescence) based on kymograph analysis. Scale bars are 100  $\mu\text{m}$  (615.38 pixels). Fluorescence acquisition (excitation illumination strength and exposure time) and image processing (contrast, brightness) parameters were constant down the column.

**Figure S38**

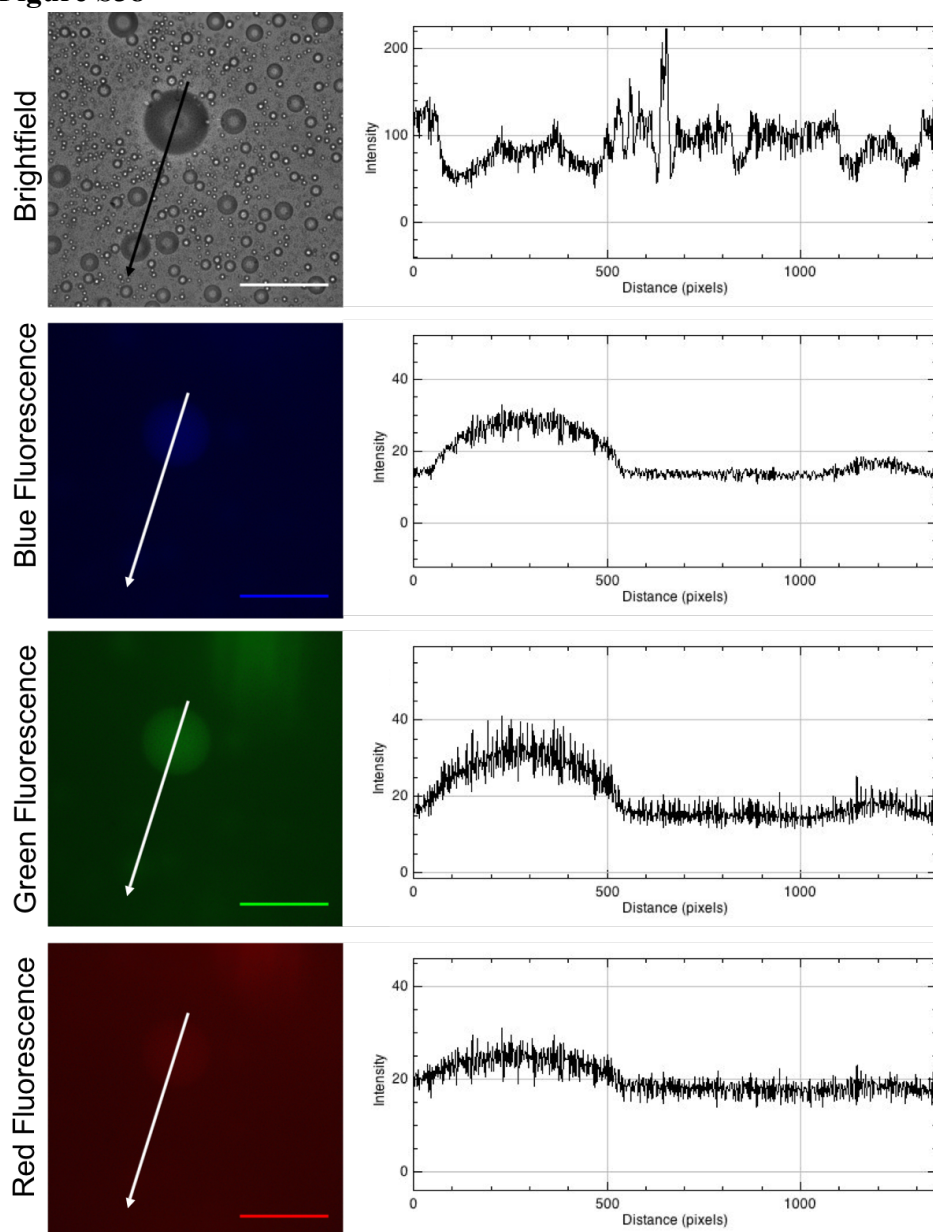

Representative brightfield and fluorescence microscopy images of polySA droplets in blue (470 nm emission), green (527 nm emission), and red (585 nm emission) channels with accompanying kymographs. The region and direction of analysis for each image were identical (in black for brightfield image and in white for fluorescence images; arrows indicate direction of analysis). The column represents a single sample. polySA shows some intrinsic fluorescence in all channels as evidenced by the kymograph analysis. Scale bars are 100  $\mu\text{m}$  (615.38 pixels). Fluorescence acquisition (excitation illumination strength and exposure time) and image processing (contrast, brightness) parameters were constant down the column.

**Figure S39**

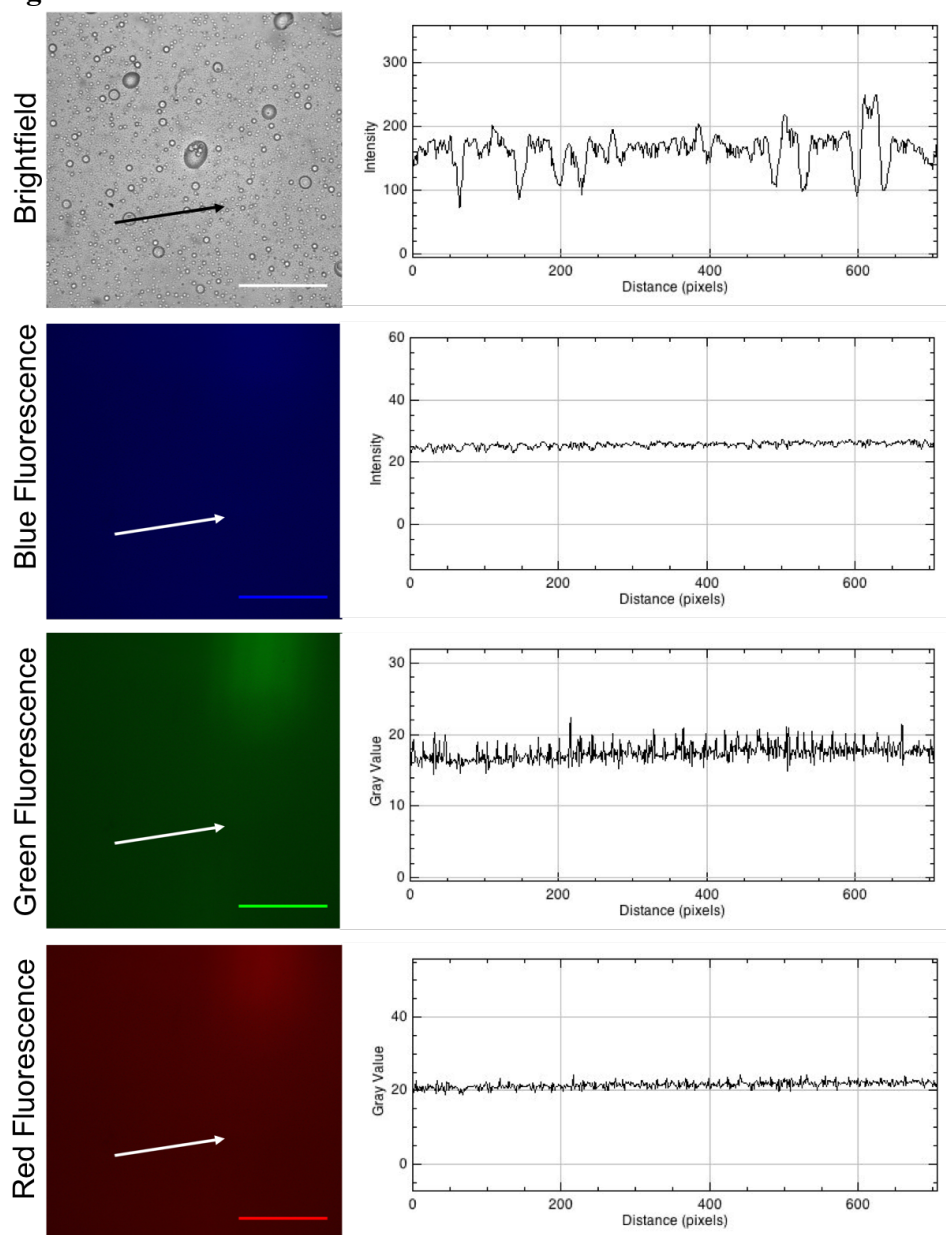

Representative brightfield and fluorescence microscopy images of polyLA droplets in blue (470 nm emission), green (527 nm emission), and red (585 nm emission) channels with accompanying kymographs. The region and direction of analysis for each image were identical (in black for brightfield image and in white for fluorescence images; arrows indicate direction of analysis). The column represents a single sample. polyLA shows little to no intrinsic fluorescence. Scale bars are 100  $\mu\text{m}$  (615.38 pixels). Fluorescence acquisition (excitation illumination strength and exposure time) and image processing (contrast, brightness) parameters were constant down the column.

**Figure S40**

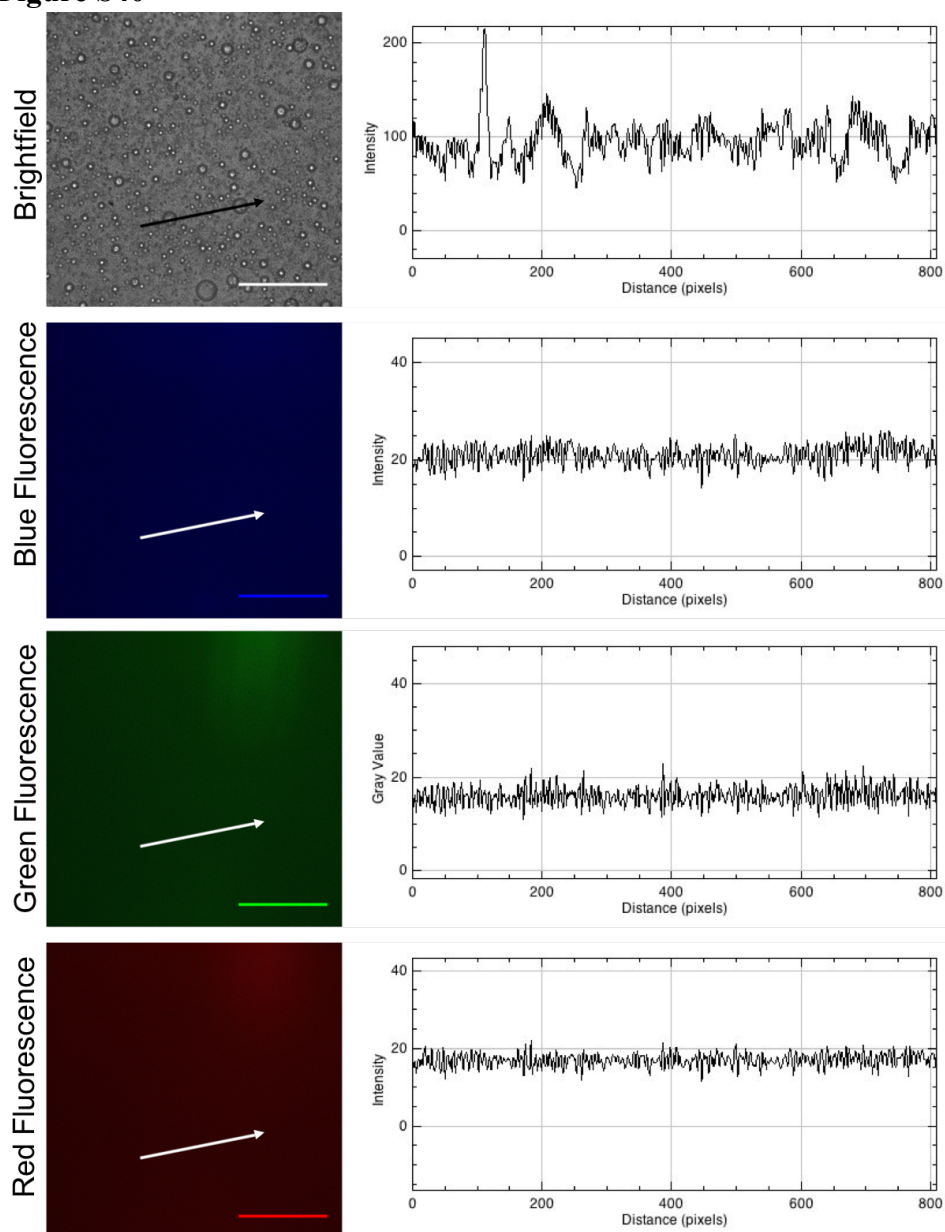

Representative brightfield and fluorescence microscopy images of polyPA droplets in blue (470 nm emission), green (527 nm emission), and red (585 nm emission) channels with accompanying kymographs. The region and direction of analysis for each image were identical (in black for brightfield image and in white for fluorescence images; arrows indicate direction of analysis). The column represents a single sample. polyPA shows no clearly observable intrinsic fluorescence based on kymograph analysis. Scale bars are 100  $\mu\text{m}$  (615.38 pixels). Fluorescence acquisition (excitation illumination strength and exposure time) and image processing (contrast, brightness) parameters were constant down the column.



**Figure S41**

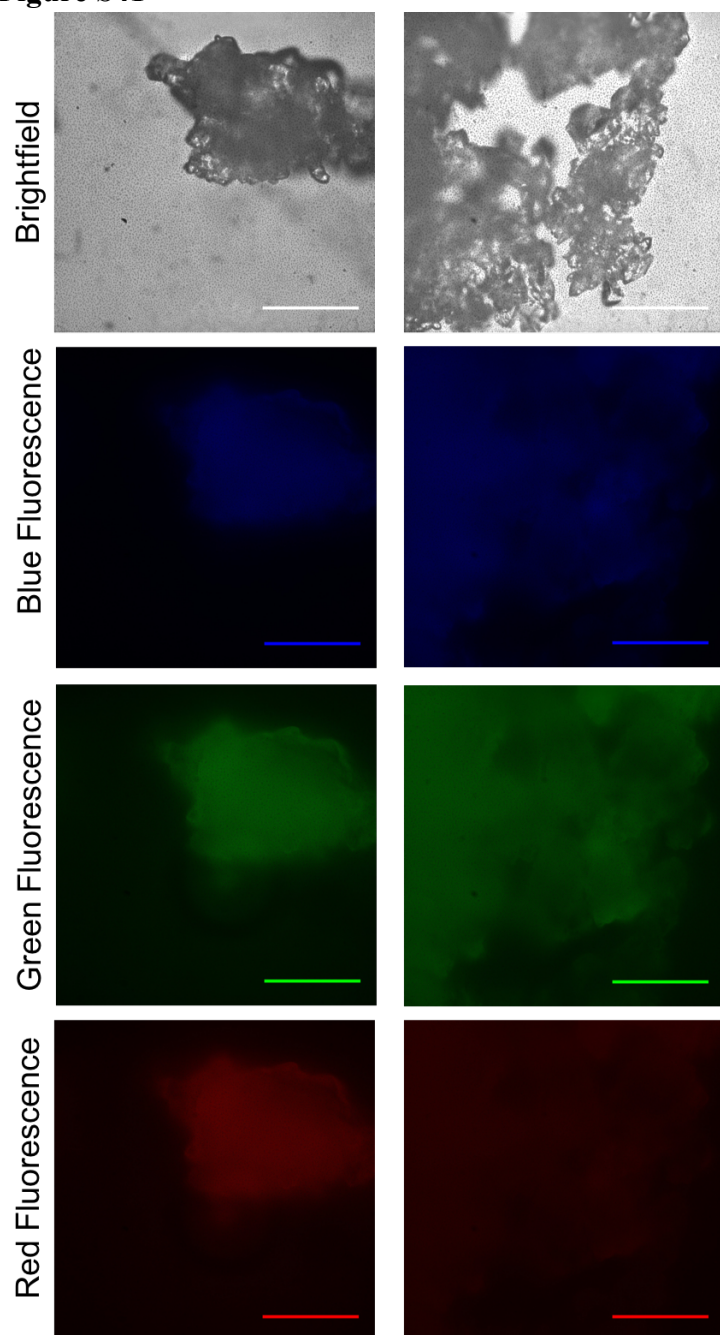

Representative brightfield and fluorescence microscopy images of the white powdery product from drying of 4a2h monomer solution (**Fig. S2**) in blue (470 nm emission), green (527 nm emission), and red (585 nm emission) channels. Each column represents a single sample. This product may show some apparent fluorescence. Scale bars are 100  $\mu\text{m}$  (615.38 pixels). Fluorescence acquisition (excitation illumination strength and exposure time) and image processing (contrast, brightness) parameters were constant down the column; this acquisition and image analysis was performed once.

**Table S1.** Peak list sorted by mass for poly(4a2h) positive mode MALDI-TOF-MS (**Fig. S1**); protonated peaks. “M+H-H<sub>2</sub>O (cyclic)”: possibility of both dehydrated or cyclic species.

| Observed Mass (m/z) | Intensity   | Calculated Mass | Identity            | Adduct                        | PPM         |
|---------------------|-------------|-----------------|---------------------|-------------------------------|-------------|
| 120.0731659         | 510367.5448 | 120.065519      | 4a2h                | M+H                           | 63.68934282 |
| 203.1046448         | 15413.79948 | 203.102637      | (4a2h) <sub>2</sub> | M+H-H <sub>2</sub> O (cyclic) | 9.885519113 |
| 221.1161804         | 69864.22229 | 221.113202      | (4a2h) <sub>2</sub> | M+H                           | 13.47011383 |
| 304.1588745         | 10586.59585 | 304.15032       | (4a2h) <sub>3</sub> | M+H-H <sub>2</sub> O (cyclic) | 28.12593457 |
| 322.1725769         | 91069.28237 | 322.160885      | (4a2h) <sub>3</sub> | M+H                           | 36.29212777 |
| 423.2255859         | 58388.26055 | 423.208568      | (4a2h) <sub>4</sub> | M+H                           | 40.21170479 |
| 524.2819214         | 26539.99417 | 524.256251      | (4a2h) <sub>5</sub> | M+H                           | 48.96534271 |
| 625.3421021         | 8320.135667 | 625.303934      | (4a2h) <sub>6</sub> | M+H                           | 61.03919858 |

**Table S2.** Peak list sorted by adduct and then mass and also colorcoded (for ease of visualization) for poly(4a2h) positive mode MALDI-TOF-MS (**Fig. S1**); protonated peaks. “M+H-H<sub>2</sub>O (cyclic)”: possibility of both dehydrated or cyclic species.

| Observed Mass (m/z) | Intensity   | Calculated Mass | Identity            | Adduct                        | PPM         |
|---------------------|-------------|-----------------|---------------------|-------------------------------|-------------|
| 120.0731659         | 510367.5448 | 120.065519      | 4a2h                | M+H                           | 63.68934282 |
| 221.1161804         | 69864.22229 | 221.113202      | (4a2h) <sub>2</sub> | M+H                           | 13.47011383 |
| 322.1725769         | 91069.28237 | 322.160885      | (4a2h) <sub>3</sub> | M+H                           | 36.29212777 |
| 423.2255859         | 58388.26055 | 423.208568      | (4a2h) <sub>4</sub> | M+H                           | 40.21170479 |
| 524.2819214         | 26539.99417 | 524.256251      | (4a2h) <sub>5</sub> | M+H                           | 48.96534271 |
| 625.3421021         | 8320.135667 | 625.303934      | (4a2h) <sub>6</sub> | M+H                           | 61.03919858 |
| 203.1046448         | 15413.79948 | 203.102637      | (4a2h) <sub>2</sub> | M+H-H <sub>2</sub> O (cyclic) | 9.885519113 |
| 304.1588745         | 10586.59585 | 304.15032       | (4a2h) <sub>3</sub> | M+H-H <sub>2</sub> O (cyclic) | 28.12593457 |

**Table S3.** Peak list sorted by mass for poly(4a2h-GA) positive mode MALDI-TOF-MS (Figs. 2 and S6); sodiated and protonated peaks. “M+H/Na-H<sub>2</sub>O (cyclic)”: possibility of both dehydrated or cyclic species.

| Observed Mass (m/z) | Intensity   | Calculated Mass | Identity                            | Adduct                         | PPM         |
|---------------------|-------------|-----------------|-------------------------------------|--------------------------------|-------------|
| 124.0400009         | 40223.07344 | 124.036896      | 4a2h                                | M+Na-H <sub>2</sub> O (cyclic) | 25.03219687 |
| 182.0437775         | 14999.38361 | 182.042376      | (4a2h)GA                            | M+Na-H <sub>2</sub> O (cyclic) | 7.69857014  |
| 200.0528717         | 8975.386506 | 200.052941      | (4a2h)GA                            | M+Na                           | 0.346388309 |
| 203.1046448         | 335548.2198 | 203.102637      | (4a2h) <sub>2</sub>                 | M+H-H <sub>2</sub> O (cyclic)  | 9.885519113 |
| 221.1161804         | 11685.60477 | 221.113202      | (4a2h) <sub>2</sub>                 | M+H                            | 13.47011383 |
| 225.0892334         | 14974.01782 | 225.084579      | (4a2h) <sub>2</sub>                 | M+Na-H <sub>2</sub> O (cyclic) | 20.67844017 |
| 261.1126099         | 135610.0097 | 261.108117      | (4a2h) <sub>2</sub> GA              | M+H-H <sub>2</sub> O (cyclic)  | 17.20690667 |
| 283.0907593         | 82496.61156 | 283.090059      | (4a2h) <sub>2</sub> GA              | M+Na-H <sub>2</sub> O (cyclic) | 2.47368983  |
| 286.1491699         | 441457.0766 | 286.13789       | (4a2h) <sub>2</sub>                 | M+ethanolamine+Na              | 39.42128042 |
| 301.1065063         | 19510.88378 | 301.100624      | (4a2h) <sub>2</sub> GA              | M+Na                           | 19.53615347 |
| 304.1588745         | 195246.9344 | 304.15032       | (4a2h) <sub>3</sub>                 | M+H-H <sub>2</sub> O (cyclic)  | 28.12593457 |
| 319.1213379         | 17488.47027 | 319.113597      | (4a2h) <sub>2</sub> GA <sub>2</sub> | M+H-H <sub>2</sub> O (cyclic)  | 24.25747782 |
| 326.1412048         | 20728.48335 | 326.132262      | (4a2h) <sub>3</sub>                 | M+Na-H <sub>2</sub> O (cyclic) | 27.42088116 |
| 341.1045532         | 36320.30733 | 341.095539      | (4a2h) <sub>2</sub> GA <sub>2</sub> | M+Na-H <sub>2</sub> O (cyclic) | 26.42726735 |
| 344.1555176         | 108391.6045 | 344.143365      | (4a2h) <sub>2</sub> GA              | M+ethanolamine+Na              | 35.31254482 |
| 359.1139221         | 20225.99359 | 359.106104      | (4a2h) <sub>2</sub> GA <sub>2</sub> | M+Na                           | 21.77105572 |
| 362.1670837         | 191480.3936 | 362.1558        | (4a2h) <sub>3</sub> GA              | M+H-H <sub>2</sub> O (cyclic)  | 31.15714286 |
| 384.1511536         | 94434.368   | 384.137742      | (4a2h) <sub>3</sub> GA              | M+Na-H <sub>2</sub> O (cyclic) | 34.91342436 |
| 387.204071          | 185011.0484 | 387.185568      | (4a2h) <sub>3</sub>                 | M+ethanolamine+Na              | 47.78857098 |
| 399.1156616         | 9479.577466 | 399.101019      | (4a2h) <sub>2</sub> GA <sub>3</sub> | M+Na-H <sub>2</sub> O (cyclic) | 36.68900931 |
| 402.1612854         | 31872.25501 | 402.148845      | (4a2h) <sub>2</sub> GA <sub>2</sub> | M+ethanolamine+Na              | 30.9348147  |
| 402.1612854         | 31872.25501 | 402.148307      | (4a2h) <sub>3</sub> GA              | M+Na                           | 32.27267099 |
| 405.2134399         | 74933.90811 | 405.198003      | (4a2h) <sub>4</sub>                 | M+H-H <sub>2</sub> O (cyclic)  | 38.09727809 |

|             |             |            |                                     |                                |             |
|-------------|-------------|------------|-------------------------------------|--------------------------------|-------------|
| 417.1277466 | 10683.35167 | 417.111584 | (4a2h) <sub>2</sub> GA <sub>3</sub> | M+Na                           | 38.74882075 |
| 420.1789246 | 61115.46674 | 420.16128  | (4a2h) <sub>3</sub> GA <sub>2</sub> | M+H-H <sub>2</sub> O (cyclic)  | 41.99473355 |
| 427.1964722 | 17597.17866 | 427.179945 | (4a2h) <sub>4</sub>                 | M+Na-H <sub>2</sub> O (cyclic) | 38.68900728 |
| 442.1593018 | 72077.419   | 442.143222 | (4a2h) <sub>3</sub> GA <sub>2</sub> | M+Na-H <sub>2</sub> O (cyclic) | 36.36775868 |
| 445.2150574 | 158052.4843 | 445.191048 | (4a2h) <sub>3</sub> GA              | M+ethanolamine+Na              | 53.93049368 |
| 460.1722412 | 31517.05646 | 460.154325 | (4a2h) <sub>2</sub> GA <sub>3</sub> | M+ethanolamine+Na              | 38.93522244 |
| 460.1722412 | 31517.05646 | 460.153787 | (4a2h) <sub>3</sub> GA <sub>2</sub> | M+Na                           | 40.1044423  |
| 463.2295227 | 133427.5362 | 463.203483 | (4a2h) <sub>4</sub> GA              | M+H-H <sub>2</sub> O (cyclic)  | 56.21655699 |
| 478.1901855 | 12458.87168 | 478.16676  | (4a2h) <sub>3</sub> GA <sub>3</sub> | M+H-H <sub>2</sub> O (cyclic)  | 48.99032923 |
| 485.2112732 | 65778.20395 | 485.185425 | (4a2h) <sub>4</sub> GA              | M+Na-H <sub>2</sub> O (cyclic) | 53.27487527 |
| 488.2608948 | 59412.83895 | 488.233251 | (4a2h) <sub>4</sub>                 | M+ethanolamine+Na              | 56.62001706 |
| 500.1743164 | 28151.63465 | 500.148702 | (4a2h) <sub>3</sub> GA <sub>3</sub> | M+Na-H <sub>2</sub> O (cyclic) | 51.21358088 |
| 503.2250366 | 59062.58119 | 503.196528 | (4a2h) <sub>3</sub> GA <sub>2</sub> | M+ethanolamine+Na              | 56.65504314 |
| 503.2250366 | 59062.58119 | 503.19599  | (4a2h) <sub>4</sub> GA              | M+Na                           | 57.72426962 |
| 506.2736511 | 24984.10188 | 506.245686 | (4a2h) <sub>5</sub>                 | M+H-H <sub>2</sub> O (cyclic)  | 55.24021986 |
| 518.1901245 | 20255.6906  | 518.159805 | (4a2h) <sub>2</sub> GA <sub>4</sub> | M+ethanolamine+Na              | 58.51382471 |
| 518.1901245 | 20255.6906  | 518.159267 | (4a2h) <sub>3</sub> GA <sub>3</sub> | M+Na                           | 59.55217626 |
| 521.2373657 | 78040.06133 | 521.208963 | (4a2h) <sub>4</sub> GA <sub>2</sub> | M+H-H <sub>2</sub> O (cyclic)  | 54.49392665 |
| 528.2578735 | 9805.778115 | 528.227628 | (4a2h) <sub>5</sub>                 | M+Na-H <sub>2</sub> O (cyclic) | 57.2585253  |
| 543.2216797 | 74038.11748 | 543.190905 | (4a2h) <sub>4</sub> GA <sub>2</sub> | M+Na-H <sub>2</sub> O (cyclic) | 56.65538159 |
| 546.2705078 | 95953.86078 | 546.238731 | (4a2h) <sub>4</sub> GA              | M+ethanolamine+Na              | 58.17385366 |
| 558.190979  | 7890.231182 | 558.154182 | (4a2h) <sub>3</sub> GA <sub>4</sub> | M+Na-H <sub>2</sub> O (cyclic) | 65.92623541 |
| 561.2334595 | 35523.90839 | 561.202008 | (4a2h) <sub>3</sub> GA <sub>3</sub> | M+ethanolamine+Na              | 56.04305144 |
| 561.2334595 | 35523.90839 | 561.20147  | (4a2h) <sub>4</sub> GA <sub>2</sub> | M+Na                           | 57.00176266 |
| 564.2841797 | 66350.08315 | 564.251166 | (4a2h) <sub>5</sub> GA              | M+H-H <sub>2</sub> O (cyclic)  | 58.50885207 |
| 576.2038574 | 8625.756098 | 576.165285 | (4a2h) <sub>2</sub> GA <sub>5</sub> | M+ethanolamine+Na              | 66.94679982 |



|             |             |            |                                     |                                |             |
|-------------|-------------|------------|-------------------------------------|--------------------------------|-------------|
| 576.2038574 | 8625.756098 | 576.164747 | (4a2h) <sub>3</sub> GA <sub>4</sub> | M+Na                           | 67.88062304 |
| 579.2522583 | 25827.92332 | 579.214443 | (4a2h) <sub>4</sub> GA <sub>3</sub> | M+H-H <sub>2</sub> O (cyclic)  | 65.2872204  |
| 586.2652588 | 35965.79904 | 586.233108 | (4a2h) <sub>5</sub> GA              | M+Na-H <sub>2</sub> O (cyclic) | 54.84301136 |
| 589.3154907 | 18672.64635 | 589.280934 | (4a2h) <sub>5</sub>                 | M+ethanolamine+Na              | 58.64218746 |
| 601.234314  | 42399.11653 | 601.196385 | (4a2h) <sub>4</sub> GA <sub>3</sub> | M+Na-H <sub>2</sub> O (cyclic) | 63.08914349 |
| 604.2858276 | 59753.9657  | 604.244211 | (4a2h) <sub>4</sub> GA <sub>2</sub> | M+ethanolamine+Na              | 68.87386961 |
| 604.2858276 | 59753.9657  | 604.243673 | (4a2h) <sub>5</sub> GA              | M+Na                           | 69.7643002  |
| 619.2484741 | 26191.3836  | 619.207488 | (4a2h) <sub>3</sub> GA <sub>4</sub> | M+ethanolamine+Na              | 66.19125543 |
| 619.2484741 | 26191.3836  | 619.20695  | (4a2h) <sub>4</sub> GA <sub>3</sub> | M+Na                           | 67.06016623 |
| 622.3010254 | 60049.53752 | 622.256646 | (4a2h) <sub>5</sub> GA <sub>2</sub> | M+H-H <sub>2</sub> O (cyclic)  | 71.32007554 |
| 644.2799072 | 51772.70637 | 644.238588 | (4a2h) <sub>5</sub> GA <sub>2</sub> | M+Na-H <sub>2</sub> O (cyclic) | 64.13652918 |
| 647.3355103 | 42949.31003 | 647.286414 | (4a2h) <sub>5</sub> GA              | M+ethanolamine+Na              | 75.84935036 |
| 659.2451172 | 16151.97222 | 659.201865 | (4a2h) <sub>4</sub> GA <sub>4</sub> | M+Na-H <sub>2</sub> O (cyclic) | 65.61296364 |
| 662.296814  | 35461.14964 | 662.249691 | (4a2h) <sub>4</sub> GA <sub>3</sub> | M+ethanolamine+Na              | 71.15588824 |
| 662.296814  | 35461.14964 | 662.249153 | (4a2h) <sub>5</sub> GA <sub>2</sub> | M+Na                           | 71.96832912 |
| 665.3424072 | 27933.75054 | 665.298849 | (4a2h) <sub>6</sub> GA              | M+H-H <sub>2</sub> O (cyclic)  | 65.47167046 |
| 677.2575073 | 13511.1714  | 677.212968 | (4a2h) <sub>3</sub> GA <sub>5</sub> | M+ethanolamine+Na              | 65.76856337 |
| 677.2575073 | 13511.1714  | 677.21243  | (4a2h) <sub>4</sub> GA <sub>4</sub> | M+Na                           | 66.56304876 |
| 680.3108521 | 30417.34061 | 680.262126 | (4a2h) <sub>5</sub> GA <sub>3</sub> | M+H-H <sub>2</sub> O (cyclic)  | 71.6283461  |
| 687.3244019 | 16780.62446 | 687.280791 | (4a2h) <sub>6</sub> GA              | M+Na-H <sub>2</sub> O (cyclic) | 63.45420325 |
| 702.2949829 | 39848.25195 | 702.244068 | (4a2h) <sub>5</sub> GA <sub>3</sub> | M+Na-H <sub>2</sub> O (cyclic) | 72.50315427 |
| 705.3435669 | 40697.91891 | 705.291894 | (4a2h) <sub>5</sub> GA <sub>2</sub> | M+ethanolamine+Na              | 73.26455251 |
| 705.3435669 | 40697.91891 | 705.291356 | (4a2h) <sub>6</sub> GA              | M+Na                           | 74.02741371 |
| 717.263855  | 5412.926919 | 717.207345 | (4a2h) <sub>4</sub> GA <sub>5</sub> | M+Na-H <sub>2</sub> O (cyclic) | 78.79169168 |
| 720.303894  | 24036.04273 | 720.255171 | (4a2h) <sub>4</sub> GA <sub>4</sub> | M+ethanolamine+Na              | 67.64691871 |
| 720.303894  | 24036.04273 | 720.254633 | (4a2h) <sub>5</sub> GA <sub>3</sub> | M+Na                           | 68.39392729 |

|             |             |            |                                     |                                |             |
|-------------|-------------|------------|-------------------------------------|--------------------------------|-------------|
| 723.3572388 | 35069.74033 | 723.304329 | (4a2h) <sub>6</sub> GA <sub>2</sub> | M+H-H <sub>2</sub> O (cyclic)  | 73.15008065 |
| 735.2769165 | 5993.886221 | 735.218448 | (4a2h) <sub>3</sub> GA <sub>6</sub> | M+ethanolamine+Na              | 79.52534945 |
| 735.2769165 | 5993.886221 | 735.21791  | (4a2h) <sub>4</sub> GA <sub>5</sub> | M+Na                           | 80.25716348 |
| 738.3204346 | 11056.77839 | 738.267606 | (4a2h) <sub>5</sub> GA <sub>4</sub> | M+H-H <sub>2</sub> O (cyclic)  | 71.55748074 |
| 745.3424072 | 28520.67782 | 745.286271 | (4a2h) <sub>6</sub> GA <sub>2</sub> | M+Na-H <sub>2</sub> O (cyclic) | 75.32169743 |
| 748.3928223 | 17103.13495 | 748.334097 | (4a2h) <sub>6</sub> GA              | M+ethanolamine+Na              | 78.4746629  |
| 760.3064575 | 20013.44797 | 760.249548 | (4a2h) <sub>5</sub> GA <sub>4</sub> | M+Na-H <sub>2</sub> O (cyclic) | 74.85636808 |
| 763.3522339 | 28262.33855 | 763.297374 | (4a2h) <sub>5</sub> GA <sub>3</sub> | M+ethanolamine+Na              | 71.87223338 |
| 763.3522339 | 28262.33855 | 763.296836 | (4a2h) <sub>6</sub> GA <sub>2</sub> | M+Na                           | 72.57712123 |
| 766.4041748 | 11138.89027 | 766.346532 | (4a2h) <sub>7</sub> GA              | M+H-H <sub>2</sub> O (cyclic)  | 75.21767581 |
| 778.3182983 | 15354.55148 | 778.260651 | (4a2h) <sub>4</sub> GA <sub>5</sub> | M+ethanolamine+Na              | 74.07202192 |
| 778.3182983 | 15354.55148 | 778.260113 | (4a2h) <sub>5</sub> GA <sub>4</sub> | M+Na                           | 74.76335871 |
| 781.3716431 | 24798.47332 | 781.309809 | (4a2h) <sub>6</sub> GA <sub>3</sub> | M+H-H <sub>2</sub> O (cyclic)  | 79.14154576 |
| 788.3884888 | 7519.70457  | 788.328474 | (4a2h) <sub>7</sub> GA              | M+Na-H <sub>2</sub> O (cyclic) | 76.12914157 |
| 803.352478  | 27697.001   | 803.291751 | (4a2h) <sub>6</sub> GA <sub>3</sub> | M+Na-H <sub>2</sub> O (cyclic) | 75.59772265 |
| 806.4040527 | 21790.57475 | 806.339577 | (4a2h) <sub>6</sub> GA <sub>2</sub> | M+ethanolamine+Na              | 79.96101871 |
| 806.4040527 | 21790.57475 | 806.339039 | (4a2h) <sub>7</sub> GA              | M+Na                           | 80.62828519 |
| 818.3193359 | 7880.62899  | 818.255028 | (4a2h) <sub>5</sub> GA <sub>5</sub> | M+Na-H <sub>2</sub> O (cyclic) | 78.59155862 |
| 821.362854  | 19850.48399 | 821.302854 | (4a2h) <sub>5</sub> GA <sub>4</sub> | M+ethanolamine+Na              | 73.05466395 |
| 821.362854  | 19850.48399 | 821.302316 | (4a2h) <sub>6</sub> GA <sub>3</sub> | M+Na                           | 73.70976901 |
| 824.4120483 | 17648.81544 | 824.352012 | (4a2h) <sub>7</sub> GA <sub>2</sub> | M+H-H <sub>2</sub> O (cyclic)  | 72.82852365 |
| 836.3344727 | 7486.395318 | 836.266131 | (4a2h) <sub>4</sub> GA <sub>6</sub> | M+ethanolamine+Na              | 81.72237696 |
| 836.3344727 | 7486.395318 | 836.265593 | (4a2h) <sub>5</sub> GA <sub>5</sub> | M+Na                           | 82.36576582 |
| 839.381897  | 12227.83666 | 839.315289 | (4a2h) <sub>6</sub> GA <sub>4</sub> | M+H-H <sub>2</sub> O (cyclic)  | 79.35989475 |
| 846.395874  | 14387.72797 | 846.333954 | (4a2h) <sub>7</sub> GA <sub>2</sub> | M+Na-H <sub>2</sub> O (cyclic) | 73.16263599 |
| 861.3621826 | 17605.83479 | 861.297231 | (4a2h) <sub>6</sub> GA <sub>4</sub> | M+Na-H <sub>2</sub> O (cyclic) | 75.4113849  |

|             |             |             |                                     |                                |             |
|-------------|-------------|-------------|-------------------------------------|--------------------------------|-------------|
| 864.4101563 | 18499.07725 | 864.345057  | (4a2h) <sub>6</sub> GA <sub>3</sub> | M+ethanolamine+Na              | 75.31627499 |
| 864.4101563 | 18499.07725 | 864.344519  | (4a2h) <sub>7</sub> GA <sub>2</sub> | M+Na                           | 75.93875886 |
| 879.3763428 | 13311.35027 | 879.308334  | (4a2h) <sub>5</sub> GA <sub>5</sub> | M+ethanolamine+Na              | 77.34348734 |
| 879.3763428 | 13311.35027 | 879.307796  | (4a2h) <sub>6</sub> GA <sub>4</sub> | M+Na                           | 77.95537957 |
| 882.4258423 | 16284.32368 | 882.357492  | (4a2h) <sub>7</sub> GA <sub>3</sub> | M+H-H <sub>2</sub> O (cyclic)  | 77.46325681 |
| 904.4099731 | 16316.53843 | 904.339434  | (4a2h) <sub>7</sub> GA <sub>3</sub> | M+Na-H <sub>2</sub> O (cyclic) | 78.00073993 |
| 907.456665  | 9863.059684 | 907.38726   | (4a2h) <sub>7</sub> GA <sub>2</sub> | M+ethanolamine+Na              | 76.48888414 |
| 907.456665  | 9863.059684 | 907.386722  | (4a2h) <sub>8</sub> GA              | M+Na                           | 77.08184097 |
| 919.3787231 | 8939.006052 | 919.302711  | (4a2h) <sub>6</sub> GA <sub>5</sub> | M+Na-H <sub>2</sub> O (cyclic) | 82.68456526 |
| 922.4274292 | 13749.00442 | 922.350537  | (4a2h) <sub>6</sub> GA <sub>4</sub> | M+ethanolamine+Na              | 83.36548407 |
| 922.4274292 | 13749.00442 | 922.349999  | (4a2h) <sub>7</sub> GA <sub>3</sub> | M+Na                           | 83.94882537 |
| 937.3886719 | 7765.893903 | 937.313814  | (4a2h) <sub>5</sub> GA <sub>6</sub> | M+ethanolamine+Na              | 79.86426091 |
| 937.3886719 | 7765.893903 | 937.313276  | (4a2h) <sub>6</sub> GA <sub>5</sub> | M+Na                           | 80.43828774 |
| 940.4359741 | 9876.554511 | 940.362972  | (4a2h) <sub>7</sub> GA <sub>4</sub> | M+H-H <sub>2</sub> O (cyclic)  | 77.63185405 |
| 962.4266357 | 13010.21676 | 962.344914  | (4a2h) <sub>7</sub> GA <sub>4</sub> | M+Na-H <sub>2</sub> O (cyclic) | 84.91938889 |
| 965.467041  | 10383.62124 | 965.39274   | (4a2h) <sub>7</sub> GA <sub>3</sub> | M+ethanolamine+Na              | 76.96454813 |
| 965.467041  | 10383.62124 | 965.392202  | (4a2h) <sub>8</sub> GA <sub>2</sub> | M+Na                           | 77.52187748 |
| 980.4384766 | 10019.87347 | 980.356017  | (4a2h) <sub>6</sub> GA <sub>5</sub> | M+ethanolamine+Na              | 84.11185383 |
| 980.4384766 | 10019.87347 | 980.355479  | (4a2h) <sub>7</sub> GA <sub>4</sub> | M+Na                           | 84.66068052 |
| 1020.439514 | 7355.481173 | 1020.350394 | (4a2h) <sub>7</sub> GA <sub>5</sub> | M+Na-H <sub>2</sub> O (cyclic) | 87.34270161 |
| 1023.480896 | 8763.829756 | 1023.39822  | (4a2h) <sub>7</sub> GA <sub>4</sub> | M+ethanolamine+Na              | 80.78575708 |
| 1023.480896 | 8763.829756 | 1023.397682 | (4a2h) <sub>8</sub> GA <sub>3</sub> | M+Na                           | 81.31149939 |
| 1038.444336 | 6218.391766 | 1038.361497 | (4a2h) <sub>6</sub> GA <sub>6</sub> | M+ethanolamine+Na              | 79.77851667 |
| 1038.444336 | 6218.391766 | 1038.360959 | (4a2h) <sub>7</sub> GA <sub>5</sub> | M+Na                           | 80.29668226 |
| 1081.49353  | 6526.155217 | 1081.4037   | (4a2h) <sub>7</sub> GA <sub>5</sub> | M+ethanolamine+Na              | 83.06821033 |
| 1081.49353  | 6526.155217 | 1081.403162 | (4a2h) <sub>8</sub> GA <sub>4</sub> | M+Na                           | 83.56575344 |

**Table S4.** Peak list sorted by adduct and then mass and also colorcoded (for ease of visualization) for poly(4a2h-GA) positive mode MALDI-TOF-MS (**Figs. 2** and **S6**); sodiated and protonated peaks. “M+H/Na-H<sub>2</sub>O (cyclic)”: possibility of both dehydrated or cyclic species.

| Observed Mass (m/z) | Intensity   | Calculated Mass | Identity                            | Adduct            | PPM         |
|---------------------|-------------|-----------------|-------------------------------------|-------------------|-------------|
| 286.1491699         | 441457.0766 | 286.13789       | (4a2h) <sub>2</sub>                 | M+ethanolamine+Na | 39.42128042 |
| 344.1555176         | 108391.6045 | 344.143365      | (4a2h) <sub>2</sub> GA              | M+ethanolamine+Na | 35.31254482 |
| 387.204071          | 185011.0484 | 387.185568      | (4a2h) <sub>3</sub>                 | M+ethanolamine+Na | 47.78857098 |
| 402.1612854         | 31872.25501 | 402.148845      | (4a2h) <sub>2</sub> GA <sub>2</sub> | M+ethanolamine+Na | 30.9348147  |
| 445.2150574         | 158052.4843 | 445.191048      | (4a2h) <sub>3</sub> GA              | M+ethanolamine+Na | 53.93049368 |
| 460.1722412         | 31517.05646 | 460.154325      | (4a2h) <sub>2</sub> GA <sub>3</sub> | M+ethanolamine+Na | 38.93522244 |
| 488.2608948         | 59412.83895 | 488.233251      | (4a2h) <sub>4</sub>                 | M+ethanolamine+Na | 56.62001706 |
| 503.2250366         | 59062.58119 | 503.196528      | (4a2h) <sub>3</sub> GA <sub>2</sub> | M+ethanolamine+Na | 56.65504314 |
| 518.1901245         | 20255.6906  | 518.159805      | (4a2h) <sub>2</sub> GA <sub>4</sub> | M+ethanolamine+Na | 58.51382471 |
| 546.2705078         | 95953.86078 | 546.238731      | (4a2h) <sub>4</sub> GA              | M+ethanolamine+Na | 58.17385366 |
| 561.2334595         | 35523.90839 | 561.202008      | (4a2h) <sub>3</sub> GA <sub>3</sub> | M+ethanolamine+Na | 56.04305144 |
| 576.2038574         | 8625.756098 | 576.165285      | (4a2h) <sub>2</sub> GA <sub>5</sub> | M+ethanolamine+Na | 66.94679982 |
| 589.3154907         | 18672.64635 | 589.280934      | (4a2h) <sub>5</sub>                 | M+ethanolamine+Na | 58.64218746 |
| 604.2858276         | 59753.9657  | 604.244211      | (4a2h) <sub>4</sub> GA <sub>2</sub> | M+ethanolamine+Na | 68.87386961 |
| 619.2484741         | 26191.3836  | 619.207488      | (4a2h) <sub>3</sub> GA <sub>4</sub> | M+ethanolamine+Na | 66.19125543 |
| 647.3355103         | 42949.31003 | 647.286414      | (4a2h) <sub>5</sub> GA              | M+ethanolamine+Na | 75.84935036 |
| 662.296814          | 35461.14964 | 662.249691      | (4a2h) <sub>4</sub> GA <sub>3</sub> | M+ethanolamine+Na | 71.15588824 |
| 677.2575073         | 13511.1714  | 677.212968      | (4a2h) <sub>3</sub> GA <sub>5</sub> | M+ethanolamine+Na | 65.76856337 |
| 705.3435669         | 40697.91891 | 705.291894      | (4a2h) <sub>5</sub> GA <sub>2</sub> | M+ethanolamine+Na | 73.26455251 |
| 720.303894          | 24036.04273 | 720.255171      | (4a2h) <sub>4</sub> GA <sub>4</sub> | M+ethanolamine+Na | 67.64691871 |
| 735.2769165         | 5993.886221 | 735.218448      | (4a2h) <sub>3</sub> GA <sub>6</sub> | M+ethanolamine+Na | 79.52534945 |
| 748.3928223         | 17103.13495 | 748.334097      | (4a2h) <sub>6</sub> GA              | M+ethanolamine+Na | 78.4746629  |
| 763.3522339         | 28262.33855 | 763.297374      | (4a2h) <sub>5</sub> GA <sub>3</sub> | M+ethanolamine+Na | 71.87223338 |

|             |             |             |                                     |                               |             |
|-------------|-------------|-------------|-------------------------------------|-------------------------------|-------------|
| 778.3182983 | 15354.55148 | 778.260651  | (4a2h) <sub>4</sub> GA <sub>5</sub> | M+ethanolamine+Na             | 74.07202192 |
| 806.4040527 | 21790.57475 | 806.339577  | (4a2h) <sub>6</sub> GA <sub>2</sub> | M+ethanolamine+Na             | 79.96101871 |
| 821.362854  | 19850.48399 | 821.302854  | (4a2h) <sub>5</sub> GA <sub>4</sub> | M+ethanolamine+Na             | 73.05466395 |
| 836.3344727 | 7486.395318 | 836.266131  | (4a2h) <sub>4</sub> GA <sub>6</sub> | M+ethanolamine+Na             | 81.72237696 |
| 864.4101563 | 18499.07725 | 864.345057  | (4a2h) <sub>6</sub> GA <sub>3</sub> | M+ethanolamine+Na             | 75.31627499 |
| 879.3763428 | 13311.35027 | 879.308334  | (4a2h) <sub>5</sub> GA <sub>5</sub> | M+ethanolamine+Na             | 77.34348734 |
| 907.456665  | 9863.059684 | 907.38726   | (4a2h) <sub>7</sub> GA <sub>2</sub> | M+ethanolamine+Na             | 76.48888414 |
| 922.4274292 | 13749.00442 | 922.350537  | (4a2h) <sub>6</sub> GA <sub>4</sub> | M+ethanolamine+Na             | 83.36548407 |
| 937.3886719 | 7765.893903 | 937.313814  | (4a2h) <sub>5</sub> GA <sub>6</sub> | M+ethanolamine+Na             | 79.86426091 |
| 965.467041  | 10383.62124 | 965.39274   | (4a2h) <sub>7</sub> GA <sub>3</sub> | M+ethanolamine+Na             | 76.96454813 |
| 980.4384766 | 10019.87347 | 980.356017  | (4a2h) <sub>6</sub> GA <sub>5</sub> | M+ethanolamine+Na             | 84.11185383 |
| 1023.480896 | 8763.829756 | 1023.39822  | (4a2h) <sub>7</sub> GA <sub>4</sub> | M+ethanolamine+Na             | 80.78575708 |
| 1038.444336 | 6218.391766 | 1038.361497 | (4a2h) <sub>6</sub> GA <sub>6</sub> | M+ethanolamine+Na             | 79.77851667 |
| 1081.49353  | 6526.155217 | 1081.4037   | (4a2h) <sub>7</sub> GA <sub>5</sub> | M+ethanolamine+Na             | 83.06821033 |
| 221.1161804 | 11685.60477 | 221.113202  | (4a2h) <sub>2</sub>                 | M+H                           | 13.47011383 |
| 203.1046448 | 335548.2198 | 203.102637  | (4a2h) <sub>2</sub>                 | M+H-H <sub>2</sub> O (cyclic) | 9.885519113 |
| 261.1126099 | 135610.0097 | 261.108117  | (4a2h) <sub>2</sub> GA              | M+H-H <sub>2</sub> O (cyclic) | 17.20690667 |
| 304.1588745 | 195246.9344 | 304.15032   | (4a2h) <sub>3</sub>                 | M+H-H <sub>2</sub> O (cyclic) | 28.12593457 |
| 319.1213379 | 17488.47027 | 319.113597  | (4a2h) <sub>2</sub> GA <sub>2</sub> | M+H-H <sub>2</sub> O (cyclic) | 24.25747782 |
| 362.1670837 | 191480.3936 | 362.1558    | (4a2h) <sub>3</sub> GA              | M+H-H <sub>2</sub> O (cyclic) | 31.15714286 |
| 405.2134399 | 74933.90811 | 405.198003  | (4a2h) <sub>4</sub>                 | M+H-H <sub>2</sub> O (cyclic) | 38.09727809 |
| 420.1789246 | 61115.46674 | 420.16128   | (4a2h) <sub>3</sub> GA <sub>2</sub> | M+H-H <sub>2</sub> O (cyclic) | 41.99473355 |
| 463.2295227 | 133427.5362 | 463.203483  | (4a2h) <sub>4</sub> GA              | M+H-H <sub>2</sub> O (cyclic) | 56.21655699 |
| 478.1901855 | 12458.87168 | 478.16676   | (4a2h) <sub>3</sub> GA <sub>3</sub> | M+H-H <sub>2</sub> O (cyclic) | 48.99032923 |
| 506.2736511 | 24984.10188 | 506.245686  | (4a2h) <sub>5</sub>                 | M+H-H <sub>2</sub> O (cyclic) | 55.24021986 |
| 521.2373657 | 78040.06133 | 521.208963  | (4a2h) <sub>4</sub> GA <sub>2</sub> | M+H-H <sub>2</sub> O (cyclic) | 54.49392665 |

|             |             |            |                                     |                               |             |
|-------------|-------------|------------|-------------------------------------|-------------------------------|-------------|
| 564.2841797 | 66350.08315 | 564.251166 | (4a2h) <sub>5</sub> GA              | M+H-H <sub>2</sub> O (cyclic) | 58.50885207 |
| 579.2522583 | 25827.92332 | 579.214443 | (4a2h) <sub>4</sub> GA <sub>3</sub> | M+H-H <sub>2</sub> O (cyclic) | 65.2872204  |
| 622.3010254 | 60049.53752 | 622.256646 | (4a2h) <sub>5</sub> GA <sub>2</sub> | M+H-H <sub>2</sub> O (cyclic) | 71.32007554 |
| 665.3424072 | 27933.75054 | 665.298849 | (4a2h) <sub>6</sub> GA              | M+H-H <sub>2</sub> O (cyclic) | 65.47167046 |
| 680.3108521 | 30417.34061 | 680.262126 | (4a2h) <sub>5</sub> GA <sub>3</sub> | M+H-H <sub>2</sub> O (cyclic) | 71.6283461  |
| 723.3572388 | 35069.74033 | 723.304329 | (4a2h) <sub>6</sub> GA <sub>2</sub> | M+H-H <sub>2</sub> O (cyclic) | 73.15008065 |
| 738.3204346 | 11056.77839 | 738.267606 | (4a2h) <sub>5</sub> GA <sub>4</sub> | M+H-H <sub>2</sub> O (cyclic) | 71.55748074 |
| 766.4041748 | 11138.89027 | 766.346532 | (4a2h) <sub>7</sub> GA              | M+H-H <sub>2</sub> O (cyclic) | 75.21767581 |
| 781.3716431 | 24798.47332 | 781.309809 | (4a2h) <sub>6</sub> GA <sub>3</sub> | M+H-H <sub>2</sub> O (cyclic) | 79.14154576 |
| 824.4120483 | 17648.81544 | 824.352012 | (4a2h) <sub>7</sub> GA <sub>2</sub> | M+H-H <sub>2</sub> O (cyclic) | 72.82852365 |
| 839.381897  | 12227.83666 | 839.315289 | (4a2h) <sub>6</sub> GA <sub>4</sub> | M+H-H <sub>2</sub> O (cyclic) | 79.35989475 |
| 882.4258423 | 16284.32368 | 882.357492 | (4a2h) <sub>7</sub> GA <sub>3</sub> | M+H-H <sub>2</sub> O (cyclic) | 77.46325681 |
| 940.4359741 | 9876.554511 | 940.362972 | (4a2h) <sub>7</sub> GA <sub>4</sub> | M+H-H <sub>2</sub> O (cyclic) | 77.63185405 |
| 200.0528717 | 8975.386506 | 200.052941 | (4a2h)GA                            | M+Na                          | 0.346388309 |
| 301.1065063 | 19510.88378 | 301.100624 | (4a2h) <sub>2</sub> GA              | M+Na                          | 19.53615347 |
| 359.1139221 | 20225.99359 | 359.106104 | (4a2h) <sub>2</sub> GA <sub>2</sub> | M+Na                          | 21.77105572 |
| 402.1612854 | 31872.25501 | 402.148307 | (4a2h) <sub>3</sub> GA              | M+Na                          | 32.27267099 |
| 417.1277466 | 10683.35167 | 417.111584 | (4a2h) <sub>2</sub> GA <sub>3</sub> | M+Na                          | 38.74882075 |
| 460.1722412 | 31517.05646 | 460.153787 | (4a2h) <sub>3</sub> GA <sub>2</sub> | M+Na                          | 40.1044423  |
| 503.2250366 | 59062.58119 | 503.19599  | (4a2h) <sub>4</sub> GA              | M+Na                          | 57.72426962 |
| 518.1901245 | 20255.6906  | 518.159267 | (4a2h) <sub>3</sub> GA <sub>3</sub> | M+Na                          | 59.55217626 |
| 561.2334595 | 35523.90839 | 561.20147  | (4a2h) <sub>4</sub> GA <sub>2</sub> | M+Na                          | 57.00176266 |
| 576.2038574 | 8625.756098 | 576.164747 | (4a2h) <sub>3</sub> GA <sub>4</sub> | M+Na                          | 67.88062304 |
| 604.2858276 | 59753.9657  | 604.243673 | (4a2h) <sub>5</sub> GA              | M+Na                          | 69.7643002  |
| 619.2484741 | 26191.3836  | 619.20695  | (4a2h) <sub>4</sub> GA <sub>3</sub> | M+Na                          | 67.06016623 |
| 662.296814  | 35461.14964 | 662.249153 | (4a2h) <sub>5</sub> GA <sub>2</sub> | M+Na                          | 71.96832912 |

|             |             |             |                                     |                                |             |
|-------------|-------------|-------------|-------------------------------------|--------------------------------|-------------|
| 677.2575073 | 13511.1714  | 677.21243   | (4a2h) <sub>4</sub> GA <sub>4</sub> | M+Na                           | 66.56304876 |
| 705.3435669 | 40697.91891 | 705.291356  | (4a2h) <sub>6</sub> GA              | M+Na                           | 74.02741371 |
| 720.303894  | 24036.04273 | 720.254633  | (4a2h) <sub>5</sub> GA <sub>3</sub> | M+Na                           | 68.39392729 |
| 735.2769165 | 5993.886221 | 735.21791   | (4a2h) <sub>4</sub> GA <sub>5</sub> | M+Na                           | 80.25716348 |
| 763.3522339 | 28262.33855 | 763.296836  | (4a2h) <sub>6</sub> GA <sub>2</sub> | M+Na                           | 72.57712123 |
| 778.3182983 | 15354.55148 | 778.260113  | (4a2h) <sub>5</sub> GA <sub>4</sub> | M+Na                           | 74.76335871 |
| 806.4040527 | 21790.57475 | 806.339039  | (4a2h) <sub>7</sub> GA              | M+Na                           | 80.62828519 |
| 821.362854  | 19850.48399 | 821.302316  | (4a2h) <sub>6</sub> GA <sub>3</sub> | M+Na                           | 73.70976901 |
| 836.3344727 | 7486.395318 | 836.265593  | (4a2h) <sub>5</sub> GA <sub>5</sub> | M+Na                           | 82.36576582 |
| 864.4101563 | 18499.07725 | 864.344519  | (4a2h) <sub>7</sub> GA <sub>2</sub> | M+Na                           | 75.93875886 |
| 879.3763428 | 13311.35027 | 879.307796  | (4a2h) <sub>6</sub> GA <sub>4</sub> | M+Na                           | 77.95537957 |
| 907.456665  | 9863.059684 | 907.386722  | (4a2h) <sub>8</sub> GA              | M+Na                           | 77.08184097 |
| 922.4274292 | 13749.00442 | 922.349999  | (4a2h) <sub>7</sub> GA <sub>3</sub> | M+Na                           | 83.94882537 |
| 937.3886719 | 7765.893903 | 937.313276  | (4a2h) <sub>6</sub> GA <sub>5</sub> | M+Na                           | 80.43828774 |
| 965.467041  | 10383.62124 | 965.392202  | (4a2h) <sub>8</sub> GA <sub>2</sub> | M+Na                           | 77.52187748 |
| 980.4384766 | 10019.87347 | 980.355479  | (4a2h) <sub>7</sub> GA <sub>4</sub> | M+Na                           | 84.66068052 |
| 1023.480896 | 8763.829756 | 1023.397682 | (4a2h) <sub>8</sub> GA <sub>3</sub> | M+Na                           | 81.31149939 |
| 1038.444336 | 6218.391766 | 1038.360959 | (4a2h) <sub>7</sub> GA <sub>5</sub> | M+Na                           | 80.29668226 |
| 1081.49353  | 6526.155217 | 1081.403162 | (4a2h) <sub>8</sub> GA <sub>4</sub> | M+Na                           | 83.56575344 |
| 124.0400009 | 40223.07344 | 124.036896  | 4a2h                                | M+Na-H <sub>2</sub> O (cyclic) | 25.03219687 |
| 182.0437775 | 14999.38361 | 182.042376  | (4a2h)GA                            | M+Na-H <sub>2</sub> O (cyclic) | 7.69857014  |
| 225.0892334 | 14974.01782 | 225.084579  | (4a2h) <sub>2</sub>                 | M+Na-H <sub>2</sub> O (cyclic) | 20.67844017 |
| 283.0907593 | 82496.61156 | 283.090059  | (4a2h) <sub>2</sub> GA              | M+Na-H <sub>2</sub> O (cyclic) | 2.47368983  |
| 326.1412048 | 20728.48335 | 326.132262  | (4a2h) <sub>3</sub>                 | M+Na-H <sub>2</sub> O (cyclic) | 27.42088116 |
| 341.1045532 | 36320.30733 | 341.095539  | (4a2h) <sub>2</sub> GA <sub>2</sub> | M+Na-H <sub>2</sub> O (cyclic) | 26.42726735 |
| 384.1511536 | 94434.368   | 384.137742  | (4a2h) <sub>3</sub> GA              | M+Na-H <sub>2</sub> O (cyclic) | 34.91342436 |

|             |             |             |                                     |                                |             |
|-------------|-------------|-------------|-------------------------------------|--------------------------------|-------------|
| 399.1156616 | 9479.577466 | 399.101019  | (4a2h) <sub>2</sub> GA <sub>3</sub> | M+Na-H <sub>2</sub> O (cyclic) | 36.68900931 |
| 427.1964722 | 17597.17866 | 427.179945  | (4a2h) <sub>4</sub>                 | M+Na-H <sub>2</sub> O (cyclic) | 38.68900728 |
| 442.1593018 | 72077.419   | 442.143222  | (4a2h) <sub>3</sub> GA <sub>2</sub> | M+Na-H <sub>2</sub> O (cyclic) | 36.36775868 |
| 485.2112732 | 65778.20395 | 485.185425  | (4a2h) <sub>4</sub> GA              | M+Na-H <sub>2</sub> O (cyclic) | 53.27487527 |
| 500.1743164 | 28151.63465 | 500.148702  | (4a2h) <sub>3</sub> GA <sub>3</sub> | M+Na-H <sub>2</sub> O (cyclic) | 51.21358088 |
| 528.2578735 | 9805.778115 | 528.227628  | (4a2h) <sub>5</sub>                 | M+Na-H <sub>2</sub> O (cyclic) | 57.2585253  |
| 543.2216797 | 74038.11748 | 543.190905  | (4a2h) <sub>4</sub> GA <sub>2</sub> | M+Na-H <sub>2</sub> O (cyclic) | 56.65538159 |
| 558.190979  | 7890.231182 | 558.154182  | (4a2h) <sub>3</sub> GA <sub>4</sub> | M+Na-H <sub>2</sub> O (cyclic) | 65.92623541 |
| 586.2652588 | 35965.79904 | 586.233108  | (4a2h) <sub>5</sub> GA              | M+Na-H <sub>2</sub> O (cyclic) | 54.84301136 |
| 601.234314  | 42399.11653 | 601.196385  | (4a2h) <sub>4</sub> GA <sub>3</sub> | M+Na-H <sub>2</sub> O (cyclic) | 63.08914349 |
| 644.2799072 | 51772.70637 | 644.238588  | (4a2h) <sub>5</sub> GA <sub>2</sub> | M+Na-H <sub>2</sub> O (cyclic) | 64.13652918 |
| 659.2451172 | 16151.97222 | 659.201865  | (4a2h) <sub>4</sub> GA <sub>4</sub> | M+Na-H <sub>2</sub> O (cyclic) | 65.61296364 |
| 687.3244019 | 16780.62446 | 687.280791  | (4a2h) <sub>6</sub> GA              | M+Na-H <sub>2</sub> O (cyclic) | 63.45420325 |
| 702.2949829 | 39848.25195 | 702.244068  | (4a2h) <sub>5</sub> GA <sub>3</sub> | M+Na-H <sub>2</sub> O (cyclic) | 72.50315427 |
| 717.263855  | 5412.926919 | 717.207345  | (4a2h) <sub>4</sub> GA <sub>5</sub> | M+Na-H <sub>2</sub> O (cyclic) | 78.79169168 |
| 745.3424072 | 28520.67782 | 745.286271  | (4a2h) <sub>6</sub> GA <sub>2</sub> | M+Na-H <sub>2</sub> O (cyclic) | 75.32169743 |
| 760.3064575 | 20013.44797 | 760.249548  | (4a2h) <sub>5</sub> GA <sub>4</sub> | M+Na-H <sub>2</sub> O (cyclic) | 74.85636808 |
| 788.3884888 | 7519.70457  | 788.328474  | (4a2h) <sub>7</sub> GA              | M+Na-H <sub>2</sub> O (cyclic) | 76.12914157 |
| 803.352478  | 27697.001   | 803.291751  | (4a2h) <sub>6</sub> GA <sub>3</sub> | M+Na-H <sub>2</sub> O (cyclic) | 75.59772265 |
| 818.3193359 | 7880.62899  | 818.255028  | (4a2h) <sub>5</sub> GA <sub>5</sub> | M+Na-H <sub>2</sub> O (cyclic) | 78.59155862 |
| 846.395874  | 14387.72797 | 846.333954  | (4a2h) <sub>7</sub> GA <sub>2</sub> | M+Na-H <sub>2</sub> O (cyclic) | 73.16263599 |
| 861.3621826 | 17605.83479 | 861.297231  | (4a2h) <sub>6</sub> GA <sub>4</sub> | M+Na-H <sub>2</sub> O (cyclic) | 75.4113849  |
| 904.4099731 | 16316.53843 | 904.339434  | (4a2h) <sub>7</sub> GA <sub>3</sub> | M+Na-H <sub>2</sub> O (cyclic) | 78.00073993 |
| 919.3787231 | 8939.006052 | 919.302711  | (4a2h) <sub>6</sub> GA <sub>5</sub> | M+Na-H <sub>2</sub> O (cyclic) | 82.68456526 |
| 962.4266357 | 13010.21676 | 962.344914  | (4a2h) <sub>7</sub> GA <sub>4</sub> | M+Na-H <sub>2</sub> O (cyclic) | 84.91938889 |
| 1020.439514 | 7355.481173 | 1020.350394 | (4a2h) <sub>7</sub> GA <sub>5</sub> | M+Na-H <sub>2</sub> O (cyclic) | 87.34270161 |



**Table S5.** Peak list sorted by mass for poly(4a2h-LA) positive mode MALDI-TOF-MS (Figs. 2 and S6); sodiated and protonated peaks. “M+H-H<sub>2</sub>O (cyclic)”: possibility of both dehydrated or cyclic species.

| Observed Mass (m/z) | Intensity   | Calculated Mass | Identity                            | Adduct                        | PPM         |
|---------------------|-------------|-----------------|-------------------------------------|-------------------------------|-------------|
| 203.1046448         | 310156.1954 | 203.102637      | (4a2h) <sub>2</sub>                 | M+H-H <sub>2</sub> O (cyclic) | 9.885519113 |
| 275.1292725         | 121712.8269 | 275.123747      | (4a2h) <sub>2</sub> LA              | M+H-H <sub>2</sub> O (cyclic) | 20.08354808 |
| 286.1534729         | 399893.0661 | 286.13789       | (4a2h) <sub>2</sub>                 | M+ethanolamine+Na             | 54.45940767 |
| 304.1632996         | 219114.1385 | 304.15032       | (4a2h) <sub>3</sub>                 | M+H-H <sub>2</sub> O (cyclic) | 42.67482277 |
| 347.1585693         | 28440.59692 | 347.144857      | (4a2h) <sub>2</sub> LA <sub>2</sub> | M+H-H <sub>2</sub> O (cyclic) | 39.50032882 |
| 358.1759644         | 130060.0404 | 358.158995      | (4a2h) <sub>2</sub> LA              | M+ethanolamine+Na             | 47.37939082 |
| 376.1924133         | 222088.7496 | 376.17143       | (4a2h) <sub>3</sub> LA              | M+H-H <sub>2</sub> O (cyclic) | 55.78129631 |
| 387.2090759         | 215042.5396 | 387.185568      | (4a2h) <sub>3</sub>                 | M+ethanolamine+Na             | 60.71488698 |
| 405.2236633         | 106882.5888 | 405.198003      | (4a2h) <sub>4</sub>                 | M+H-H <sub>2</sub> O (cyclic) | 63.32787874 |
| 419.190094          | 8245.149344 | 419.165967      | (4a2h) <sub>2</sub> LA <sub>3</sub> | M+H-H <sub>2</sub> O (cyclic) | 57.5595251  |
| 430.2052612         | 31175.58651 | 430.180105      | (4a2h) <sub>2</sub> LA <sub>2</sub> | M+ethanolamine+Na             | 58.47836687 |
| 448.222168          | 98427.2027  | 448.19254       | (4a2h) <sub>3</sub> LA <sub>2</sub> | M+H-H <sub>2</sub> O (cyclic) | 66.10544879 |
| 459.2406921         | 204851.9006 | 459.206678      | (4a2h) <sub>3</sub> LA              | M+ethanolamine+Na             | 74.07152515 |
| 477.2516174         | 178425.8422 | 477.219113      | (4a2h) <sub>4</sub> LA              | M+H-H <sub>2</sub> O (cyclic) | 68.11217555 |
| 488.2664795         | 95265.03239 | 488.233251      | (4a2h) <sub>4</sub>                 | M+ethanolamine+Na             | 68.05864191 |
| 502.2393799         | 10106.00743 | 502.201215      | (4a2h) <sub>2</sub> LA <sub>3</sub> | M+ethanolamine+Na             | 75.99520244 |
| 506.2850952         | 43273.87977 | 506.245686      | (4a2h) <sub>5</sub>                 | M+H-H <sub>2</sub> O (cyclic) | 77.84602633 |
| 520.2515259         | 35344.78352 | 520.21365       | (4a2h) <sub>3</sub> LA <sub>3</sub> | M+H-H <sub>2</sub> O (cyclic) | 72.80831443 |
| 531.2701416         | 92994.80409 | 531.227788      | (4a2h) <sub>3</sub> LA <sub>2</sub> | M+ethanolamine+Na             | 79.72776078 |
| 549.2802124         | 129416.6699 | 549.240223      | (4a2h) <sub>4</sub> LA <sub>2</sub> | M+H-H <sub>2</sub> O (cyclic) | 72.80858234 |
| 560.3005981         | 147956.14   | 560.254361      | (4a2h) <sub>4</sub> LA              | M+ethanolamine+Na             | 82.52884443 |
| 578.3167114         | 106401.573  | 578.266796      | (4a2h) <sub>5</sub> LA              | M+H-H <sub>2</sub> O (cyclic) | 86.31902496 |
| 589.3216553         | 39550.91519 | 589.280934      | (4a2h) <sub>5</sub>                 | M+ethanolamine+Na             | 69.10332687 |

|             |             |            |                                     |                               |             |
|-------------|-------------|------------|-------------------------------------|-------------------------------|-------------|
| 592.2870483 | 13760.19135 | 592.23476  | (4a2h) <sub>3</sub> LA <sub>4</sub> | M+H-H <sub>2</sub> O (cyclic) | 88.28988694 |
| 603.2990112 | 34314.20048 | 603.248898 | (4a2h) <sub>3</sub> LA <sub>3</sub> | M+ethanolamine+Na             | 83.07222801 |
| 607.3388672 | 17711.5739  | 607.293369 | (4a2h) <sub>6</sub>                 | M+H-H <sub>2</sub> O (cyclic) | 74.91961929 |
| 621.3122559 | 64947.32759 | 621.261333 | (4a2h) <sub>4</sub> LA <sub>3</sub> | M+H-H <sub>2</sub> O (cyclic) | 81.96688945 |
| 632.3282471 | 103996.2997 | 632.275471 | (4a2h) <sub>4</sub> LA <sub>2</sub> | M+ethanolamine+Na             | 83.47005763 |
| 650.3464355 | 106994.1225 | 650.287906 | (4a2h) <sub>5</sub> LA <sub>2</sub> | M+H-H <sub>2</sub> O (cyclic) | 90.00559054 |
| 661.3550415 | 81982.80034 | 661.302044 | (4a2h) <sub>5</sub> LA              | M+ethanolamine+Na             | 80.14114652 |
| 664.326416  | 6966.899115 | 664.25587  | (4a2h) <sub>3</sub> LA <sub>5</sub> | M+H-H <sub>2</sub> O (cyclic) | 106.203075  |
| 675.3336792 | 12023.88379 | 675.270008 | (4a2h) <sub>3</sub> LA <sub>4</sub> | M+ethanolamine+Na             | 94.28998511 |
| 679.3762207 | 52742.31982 | 679.314479 | (4a2h) <sub>6</sub> LA              | M+H-H <sub>2</sub> O (cyclic) | 90.88824824 |
| 690.3737183 | 17061.40467 | 690.328617 | (4a2h) <sub>6</sub>                 | M+ethanolamine+Na             | 65.33303254 |
| 693.3427734 | 27939.0476  | 693.282443 | (4a2h) <sub>4</sub> LA <sub>4</sub> | M+H-H <sub>2</sub> O (cyclic) | 87.02144214 |
| 704.3581543 | 52496.08738 | 704.296581 | (4a2h) <sub>4</sub> LA <sub>3</sub> | M+ethanolamine+Na             | 87.42523911 |
| 708.3920898 | 7487.961148 | 708.341052 | (4a2h) <sub>7</sub>                 | M+H-H <sub>2</sub> O (cyclic) | 72.05264167 |
| 722.3729248 | 71394.94506 | 722.309016 | (4a2h) <sub>5</sub> LA <sub>3</sub> | M+H-H <sub>2</sub> O (cyclic) | 88.47848163 |
| 733.3890991 | 77791.51538 | 733.323154 | (4a2h) <sub>5</sub> LA <sub>2</sub> | M+ethanolamine+Na             | 89.92641326 |
| 736.3734741 | 5038.285162 | 736.27698  | (4a2h) <sub>3</sub> LA <sub>6</sub> | M+H-H <sub>2</sub> O (cyclic) | 131.0568218 |
| 747.3637695 | 5890.81099  | 747.291118 | (4a2h) <sub>3</sub> LA <sub>5</sub> | M+ethanolamine+Na             | 97.21985081 |
| 751.4077148 | 68382.78517 | 751.335589 | (4a2h) <sub>6</sub> LA <sub>2</sub> | M+H-H <sub>2</sub> O (cyclic) | 95.99684223 |
| 762.4111938 | 40423.64349 | 762.349727 | (4a2h) <sub>6</sub> LA              | M+ethanolamine+Na             | 80.62814982 |
| 765.3768311 | 12201.02662 | 765.303553 | (4a2h) <sub>4</sub> LA <sub>5</sub> | M+H-H <sub>2</sub> O (cyclic) | 95.75031334 |
| 776.3899536 | 21872.28955 | 776.317691 | (4a2h) <sub>4</sub> LA <sub>4</sub> | M+ethanolamine+Na             | 93.08381586 |
| 780.4337158 | 23835.15482 | 780.362162 | (4a2h) <sub>7</sub> LA              | M+H-H <sub>2</sub> O (cyclic) | 91.69309262 |
| 791.4186401 | 8773.753124 | 791.3763   | (4a2h) <sub>7</sub>                 | M+ethanolamine+Na             | 53.50190169 |
| 794.40448   | 37760.8861  | 794.330126 | (4a2h) <sub>5</sub> LA <sub>4</sub> | M+H-H <sub>2</sub> O (cyclic) | 93.60589202 |
| 805.4151001 | 51204.31114 | 805.344264 | (4a2h) <sub>5</sub> LA <sub>3</sub> | M+ethanolamine+Na             | 87.95753713 |

|             |             |             |                                     |                               |             |
|-------------|-------------|-------------|-------------------------------------|-------------------------------|-------------|
| 823.43396   | 57880.14138 | 823.356699  | (4a2h) <sub>6</sub> LA <sub>3</sub> | M+H-H <sub>2</sub> O (cyclic) | 93.83656087 |
| 834.4454956 | 48137.42963 | 834.370837  | (4a2h) <sub>6</sub> LA <sub>2</sub> | M+ethanolamine+Na             | 89.47892435 |
| 837.4158936 | 6953.435255 | 837.324663  | (4a2h) <sub>4</sub> LA <sub>6</sub> | M+H-H <sub>2</sub> O (cyclic) | 108.9548165 |
| 848.4168701 | 9679.751505 | 848.338801  | (4a2h) <sub>4</sub> LA <sub>5</sub> | M+ethanolamine+Na             | 92.02587092 |
| 852.4661255 | 37074.11195 | 852.383272  | (4a2h) <sub>7</sub> LA <sub>2</sub> | M+H-H <sub>2</sub> O (cyclic) | 97.20215157 |
| 863.4682617 | 19473.37411 | 863.39741   | (4a2h) <sub>7</sub> LA              | M+ethanolamine+Na             | 82.06153757 |
| 866.4376221 | 18277.77089 | 866.351236  | (4a2h) <sub>5</sub> LA <sub>5</sub> | M+H-H <sub>2</sub> O (cyclic) | 99.71252583 |
| 877.4467163 | 25930.19433 | 877.365374  | (4a2h) <sub>5</sub> LA <sub>4</sub> | M+ethanolamine+Na             | 92.71201191 |
| 881.4817505 | 10476.86646 | 881.409845  | (4a2h) <sub>8</sub> LA              | M+H-H <sub>2</sub> O (cyclic) | 81.58008265 |
| 892.4644165 | 5588.566316 | 892.423983  | (4a2h) <sub>8</sub>                 | M+ethanolamine+Na             | 45.30750492 |
| 895.4604492 | 36897.1879  | 895.377809  | (4a2h) <sub>6</sub> LA <sub>4</sub> | M+H-H <sub>2</sub> O (cyclic) | 92.29647884 |
| 906.4762573 | 37945.76358 | 906.391947  | (4a2h) <sub>6</sub> LA <sub>3</sub> | M+ethanolamine+Na             | 93.01751221 |
| 924.4910889 | 38167.21718 | 924.404382  | (4a2h) <sub>7</sub> LA <sub>3</sub> | M+H-H <sub>2</sub> O (cyclic) | 93.79755082 |
| 935.505127  | 26021.91744 | 935.41852   | (4a2h) <sub>7</sub> LA <sub>2</sub> | M+ethanolamine+Na             | 92.5863142  |
| 938.463623  | 9315.307001 | 938.372346  | (4a2h) <sub>5</sub> LA <sub>6</sub> | M+H-H <sub>2</sub> O (cyclic) | 97.27167194 |
| 949.4743652 | 12739.08974 | 949.386484  | (4a2h) <sub>5</sub> LA <sub>5</sub> | M+ethanolamine+Na             | 92.56634203 |
| 953.5228271 | 17961.87844 | 953.430955  | (4a2h) <sub>8</sub> LA <sub>2</sub> | M+H-H <sub>2</sub> O (cyclic) | 96.35951877 |
| 964.5188599 | 9479.26976  | 964.445093  | (4a2h) <sub>8</sub> LA              | M+ethanolamine+Na             | 76.48632725 |
| 967.491333  | 20212.78028 | 967.398919  | (4a2h) <sub>6</sub> LA <sub>5</sub> | M+H-H <sub>2</sub> O (cyclic) | 95.52833499 |
| 978.5040283 | 23606.18319 | 978.413057  | (4a2h) <sub>6</sub> LA <sub>4</sub> | M+ethanolamine+Na             | 92.97844029 |
| 996.520874  | 28319.96781 | 996.425492  | (4a2h) <sub>7</sub> LA <sub>4</sub> | M+H-H <sub>2</sub> O (cyclic) | 95.72418988 |
| 1007.528015 | 24642.33925 | 1007.43963  | (4a2h) <sub>7</sub> LA <sub>3</sub> | M+ethanolamine+Na             | 87.73244308 |
| 1009.531433 | 6000.015279 | 1010.393456 | (4a2h) <sub>5</sub> LA <sub>7</sub> | M+H-H <sub>2</sub> O (cyclic) | 853.1556542 |
| 1021.504334 | 6606.929504 | 1021.407594 | (4a2h) <sub>5</sub> LA <sub>6</sub> | M+ethanolamine+Na             | 94.71194513 |
| 1025.549072 | 21264.62702 | 1025.452065 | (4a2h) <sub>8</sub> LA <sub>3</sub> | M+H-H <sub>2</sub> O (cyclic) | 94.59951695 |
| 1036.551514 | 13597.46102 | 1036.466203 | (4a2h) <sub>8</sub> LA <sub>2</sub> | M+ethanolamine+Na             | 82.3091672  |

|             |             |             |                                     |                               |             |
|-------------|-------------|-------------|-------------------------------------|-------------------------------|-------------|
| 1039.526733 | 10551.73249 | 1039.420029 | (4a2h) <sub>6</sub> LA <sub>6</sub> | M+H-H <sub>2</sub> O (cyclic) | 102.6576331 |
| 1050.529785 | 12881.88462 | 1050.434167 | (4a2h) <sub>6</sub> LA <sub>5</sub> | M+ethanolamine+Na             | 91.0272752  |
| 1065.556641 | 5067.830871 | 1065.492776 | (4a2h) <sub>9</sub> LA              | M+ethanolamine+Na             | 59.93904552 |
| 1068.548218 | 17510.4293  | 1068.446602 | (4a2h) <sub>7</sub> LA <sub>5</sub> | M+H-H <sub>2</sub> O (cyclic) | 95.10608187 |
| 1079.56189  | 16979.74775 | 1079.46074  | (4a2h) <sub>7</sub> LA <sub>4</sub> | M+ethanolamine+Na             | 93.70387106 |
| 1081.560547 | 5295.226308 | 1082.414566 | (4a2h) <sub>5</sub> LA <sub>8</sub> | M+H-H <sub>2</sub> O (cyclic) | 788.9944822 |
| 1097.582886 | 18080.18737 | 1097.473175 | (4a2h) <sub>8</sub> LA <sub>4</sub> | M+H-H <sub>2</sub> O (cyclic) | 99.96667117 |
| 1108.584229 | 13885.34982 | 1108.487313 | (4a2h) <sub>8</sub> LA <sub>3</sub> | M+ethanolamine+Na             | 87.43042781 |
| 1111.551025 | 5835.771056 | 1111.441139 | (4a2h) <sub>6</sub> LA <sub>7</sub> | M+H-H <sub>2</sub> O (cyclic) | 98.86838461 |
| 1122.5625   | 6667.675158 | 1122.455277 | (4a2h) <sub>6</sub> LA <sub>6</sub> | M+ethanolamine+Na             | 95.52540952 |
| 1137.598022 | 7258.682181 | 1137.513886 | (4a2h) <sub>9</sub> LA <sub>2</sub> | M+ethanolamine+Na             | 73.96521575 |
| 1140.577637 | 9875.486724 | 1140.467712 | (4a2h) <sub>7</sub> LA <sub>6</sub> | M+H-H <sub>2</sub> O (cyclic) | 96.38564849 |
| 1151.593872 | 10620.58957 | 1151.48185  | (4a2h) <sub>7</sub> LA <sub>5</sub> | M+ethanolamine+Na             | 97.28513741 |
| 1169.605347 | 13049.81845 | 1169.494285 | (4a2h) <sub>8</sub> LA <sub>5</sub> | M+H-H <sub>2</sub> O (cyclic) | 94.96556026 |
| 1180.612427 | 11601.27408 | 1180.508423 | (4a2h) <sub>8</sub> LA <sub>4</sub> | M+ethanolamine+Na             | 88.10081993 |
| 1209.63916  | 7651.434319 | 1209.534996 | (4a2h) <sub>9</sub> LA <sub>3</sub> | M+ethanolamine+Na             | 86.11917832 |
| 1212.605591 | 5658.185677 | 1212.488822 | (4a2h) <sub>7</sub> LA <sub>7</sub> | M+H-H <sub>2</sub> O (cyclic) | 96.30506928 |
| 1223.617432 | 6097.388143 | 1223.50296  | (4a2h) <sub>7</sub> LA <sub>6</sub> | M+ethanolamine+Na             | 93.56057463 |
| 1252.644043 | 8275.685694 | 1252.529533 | (4a2h) <sub>8</sub> LA <sub>5</sub> | M+ethanolamine+Na             | 91.42297006 |
| 1281.665894 | 7024.973073 | 1281.556106 | (4a2h) <sub>9</sub> LA <sub>4</sub> | M+ethanolamine+Na             | 85.66737694 |
| 1324.674805 | 5106.571028 | 1324.550643 | (4a2h) <sub>8</sub> LA <sub>6</sub> | M+ethanolamine+Na             | 93.73872615 |

**Table S6.** Peak list sorted by adduct and then mass and also colorcoded (for ease of visualization) for poly(4a2h-LA) positive mode MALDI-TOF-MS (**Figs. 2** and **S6**); sodiated and protonated peaks. “M+H-H<sub>2</sub>O (cyclic)”: possibility of both dehydrated or cyclic species.

| Observed Mass (m/z) | Intensity   | Calculated Mass | Identity                            | Adduct            | PPM         |
|---------------------|-------------|-----------------|-------------------------------------|-------------------|-------------|
| 286.1534729         | 399893.0661 | 286.13789       | (4a2h) <sub>2</sub>                 | M+ethanolamine+Na | 54.45940767 |
| 358.1759644         | 130060.0404 | 358.158995      | (4a2h) <sub>2</sub> LA              | M+ethanolamine+Na | 47.37939082 |
| 387.2090759         | 215042.5396 | 387.185568      | (4a2h) <sub>3</sub>                 | M+ethanolamine+Na | 60.71488698 |
| 430.2052612         | 31175.58651 | 430.180105      | (4a2h) <sub>2</sub> LA <sub>2</sub> | M+ethanolamine+Na | 58.47836687 |
| 459.2406921         | 204851.9006 | 459.206678      | (4a2h) <sub>3</sub> LA              | M+ethanolamine+Na | 74.07152515 |
| 488.2664795         | 95265.03239 | 488.233251      | (4a2h) <sub>4</sub>                 | M+ethanolamine+Na | 68.05864191 |
| 502.2393799         | 10106.00743 | 502.201215      | (4a2h) <sub>2</sub> LA <sub>3</sub> | M+ethanolamine+Na | 75.99520244 |
| 531.2701416         | 92994.80409 | 531.227788      | (4a2h) <sub>3</sub> LA <sub>2</sub> | M+ethanolamine+Na | 79.72776078 |
| 560.3005981         | 147956.14   | 560.254361      | (4a2h) <sub>4</sub> LA              | M+ethanolamine+Na | 82.52884443 |
| 589.3216553         | 39550.91519 | 589.280934      | (4a2h) <sub>5</sub>                 | M+ethanolamine+Na | 69.10332687 |
| 603.2990112         | 34314.20048 | 603.248898      | (4a2h) <sub>3</sub> LA <sub>3</sub> | M+ethanolamine+Na | 83.07222801 |
| 632.3282471         | 103996.2997 | 632.275471      | (4a2h) <sub>4</sub> LA <sub>2</sub> | M+ethanolamine+Na | 83.47005763 |
| 661.3550415         | 81982.80034 | 661.302044      | (4a2h) <sub>5</sub> LA              | M+ethanolamine+Na | 80.14114652 |
| 675.3336792         | 12023.88379 | 675.270008      | (4a2h) <sub>3</sub> LA <sub>4</sub> | M+ethanolamine+Na | 94.28998511 |
| 690.3737183         | 17061.40467 | 690.328617      | (4a2h) <sub>6</sub>                 | M+ethanolamine+Na | 65.33303254 |
| 704.3581543         | 52496.08738 | 704.296581      | (4a2h) <sub>4</sub> LA <sub>3</sub> | M+ethanolamine+Na | 87.42523911 |
| 733.3890991         | 77791.51538 | 733.323154      | (4a2h) <sub>5</sub> LA <sub>2</sub> | M+ethanolamine+Na | 89.92641326 |
| 747.3637695         | 5890.81099  | 747.291118      | (4a2h) <sub>3</sub> LA <sub>5</sub> | M+ethanolamine+Na | 97.21985081 |
| 762.4111938         | 40423.64349 | 762.349727      | (4a2h) <sub>6</sub> LA              | M+ethanolamine+Na | 80.62814982 |
| 776.3899536         | 21872.28955 | 776.317691      | (4a2h) <sub>4</sub> LA <sub>4</sub> | M+ethanolamine+Na | 93.08381586 |
| 791.4186401         | 8773.753124 | 791.3763        | (4a2h) <sub>7</sub>                 | M+ethanolamine+Na | 53.50190169 |
| 805.4151001         | 51204.31114 | 805.344264      | (4a2h) <sub>5</sub> LA <sub>3</sub> | M+ethanolamine+Na | 87.95753713 |
| 834.4454956         | 48137.42963 | 834.370837      | (4a2h) <sub>6</sub> LA <sub>2</sub> | M+ethanolamine+Na | 89.47892435 |

|             |             |             |                                     |                               |             |
|-------------|-------------|-------------|-------------------------------------|-------------------------------|-------------|
| 848.4168701 | 9679.751505 | 848.338801  | (4a2h) <sub>4</sub> LA <sub>5</sub> | M+ethanolamine+Na             | 92.02587092 |
| 863.4682617 | 19473.37411 | 863.39741   | (4a2h) <sub>7</sub> LA              | M+ethanolamine+Na             | 82.06153757 |
| 877.4467163 | 25930.19433 | 877.365374  | (4a2h) <sub>5</sub> LA <sub>4</sub> | M+ethanolamine+Na             | 92.71201191 |
| 892.4644165 | 5588.566316 | 892.423983  | (4a2h) <sub>8</sub>                 | M+ethanolamine+Na             | 45.30750492 |
| 906.4762573 | 37945.76358 | 906.391947  | (4a2h) <sub>6</sub> LA <sub>3</sub> | M+ethanolamine+Na             | 93.01751221 |
| 935.505127  | 26021.91744 | 935.41852   | (4a2h) <sub>7</sub> LA <sub>2</sub> | M+ethanolamine+Na             | 92.5863142  |
| 949.4743652 | 12739.08974 | 949.386484  | (4a2h) <sub>5</sub> LA <sub>5</sub> | M+ethanolamine+Na             | 92.56634203 |
| 964.5188599 | 9479.26976  | 964.445093  | (4a2h) <sub>8</sub> LA              | M+ethanolamine+Na             | 76.48632725 |
| 978.5040283 | 23606.18319 | 978.413057  | (4a2h) <sub>6</sub> LA <sub>4</sub> | M+ethanolamine+Na             | 92.97844029 |
| 1007.528015 | 24642.33925 | 1007.43963  | (4a2h) <sub>7</sub> LA <sub>3</sub> | M+ethanolamine+Na             | 87.73244308 |
| 1021.504334 | 6606.929504 | 1021.407594 | (4a2h) <sub>5</sub> LA <sub>6</sub> | M+ethanolamine+Na             | 94.71194513 |
| 1036.551514 | 13597.46102 | 1036.466203 | (4a2h) <sub>8</sub> LA <sub>2</sub> | M+ethanolamine+Na             | 82.3091672  |
| 1050.529785 | 12881.88462 | 1050.434167 | (4a2h) <sub>6</sub> LA <sub>5</sub> | M+ethanolamine+Na             | 91.0272752  |
| 1065.556641 | 5067.830871 | 1065.492776 | (4a2h) <sub>9</sub> LA              | M+ethanolamine+Na             | 59.93904552 |
| 1079.56189  | 16979.74775 | 1079.46074  | (4a2h) <sub>7</sub> LA <sub>4</sub> | M+ethanolamine+Na             | 93.70387106 |
| 1108.584229 | 13885.34982 | 1108.487313 | (4a2h) <sub>8</sub> LA <sub>3</sub> | M+ethanolamine+Na             | 87.43042781 |
| 1122.5625   | 6667.675158 | 1122.455277 | (4a2h) <sub>6</sub> LA <sub>6</sub> | M+ethanolamine+Na             | 95.52540952 |
| 1137.598022 | 7258.682181 | 1137.513886 | (4a2h) <sub>9</sub> LA <sub>2</sub> | M+ethanolamine+Na             | 73.96521575 |
| 1151.593872 | 10620.58957 | 1151.48185  | (4a2h) <sub>7</sub> LA <sub>5</sub> | M+ethanolamine+Na             | 97.28513741 |
| 1180.612427 | 11601.27408 | 1180.508423 | (4a2h) <sub>8</sub> LA <sub>4</sub> | M+ethanolamine+Na             | 88.10081993 |
| 1209.63916  | 7651.434319 | 1209.534996 | (4a2h) <sub>9</sub> LA <sub>3</sub> | M+ethanolamine+Na             | 86.11917832 |
| 1223.617432 | 6097.388143 | 1223.50296  | (4a2h) <sub>7</sub> LA <sub>6</sub> | M+ethanolamine+Na             | 93.56057463 |
| 1252.644043 | 8275.685694 | 1252.529533 | (4a2h) <sub>8</sub> LA <sub>5</sub> | M+ethanolamine+Na             | 91.42297006 |
| 1281.665894 | 7024.973073 | 1281.556106 | (4a2h) <sub>9</sub> LA <sub>4</sub> | M+ethanolamine+Na             | 85.66737694 |
| 1324.674805 | 5106.571028 | 1324.550643 | (4a2h) <sub>8</sub> LA <sub>6</sub> | M+ethanolamine+Na             | 93.73872615 |
| 203.1046448 | 310156.1954 | 203.102637  | (4a2h) <sub>2</sub>                 | M+H-H <sub>2</sub> O (cyclic) | 9.885519113 |

|             |             |            |                                     |                               |             |
|-------------|-------------|------------|-------------------------------------|-------------------------------|-------------|
| 275.1292725 | 121712.8269 | 275.123747 | (4a2h) <sub>2</sub> LA              | M+H-H <sub>2</sub> O (cyclic) | 20.08354808 |
| 304.1632996 | 219114.1385 | 304.15032  | (4a2h) <sub>3</sub>                 | M+H-H <sub>2</sub> O (cyclic) | 42.67482277 |
| 347.1585693 | 28440.59692 | 347.144857 | (4a2h) <sub>2</sub> LA <sub>2</sub> | M+H-H <sub>2</sub> O (cyclic) | 39.50032882 |
| 376.1924133 | 222088.7496 | 376.17143  | (4a2h) <sub>3</sub> LA              | M+H-H <sub>2</sub> O (cyclic) | 55.78129631 |
| 405.2236633 | 106882.5888 | 405.198003 | (4a2h) <sub>4</sub>                 | M+H-H <sub>2</sub> O (cyclic) | 63.32787874 |
| 419.190094  | 8245.149344 | 419.165967 | (4a2h) <sub>2</sub> LA <sub>3</sub> | M+H-H <sub>2</sub> O (cyclic) | 57.5595251  |
| 448.222168  | 98427.2027  | 448.19254  | (4a2h) <sub>3</sub> LA <sub>2</sub> | M+H-H <sub>2</sub> O (cyclic) | 66.10544879 |
| 477.2516174 | 178425.8422 | 477.219113 | (4a2h) <sub>4</sub> LA              | M+H-H <sub>2</sub> O (cyclic) | 68.11217555 |
| 506.2850952 | 43273.87977 | 506.245686 | (4a2h) <sub>5</sub>                 | M+H-H <sub>2</sub> O (cyclic) | 77.84602633 |
| 520.2515259 | 35344.78352 | 520.21365  | (4a2h) <sub>3</sub> LA <sub>3</sub> | M+H-H <sub>2</sub> O (cyclic) | 72.80831443 |
| 549.2802124 | 129416.6699 | 549.240223 | (4a2h) <sub>4</sub> LA <sub>2</sub> | M+H-H <sub>2</sub> O (cyclic) | 72.80858234 |
| 578.3167114 | 106401.573  | 578.266796 | (4a2h) <sub>5</sub> LA              | M+H-H <sub>2</sub> O (cyclic) | 86.31902496 |
| 592.2870483 | 13760.19135 | 592.23476  | (4a2h) <sub>3</sub> LA <sub>4</sub> | M+H-H <sub>2</sub> O (cyclic) | 88.28988694 |
| 607.3388672 | 17711.5739  | 607.293369 | (4a2h) <sub>6</sub>                 | M+H-H <sub>2</sub> O (cyclic) | 74.91961929 |
| 621.3122559 | 64947.32759 | 621.261333 | (4a2h) <sub>4</sub> LA <sub>3</sub> | M+H-H <sub>2</sub> O (cyclic) | 81.96688945 |
| 650.3464355 | 106994.1225 | 650.287906 | (4a2h) <sub>5</sub> LA <sub>2</sub> | M+H-H <sub>2</sub> O (cyclic) | 90.00559054 |
| 664.326416  | 6966.899115 | 664.25587  | (4a2h) <sub>3</sub> LA <sub>5</sub> | M+H-H <sub>2</sub> O (cyclic) | 106.203075  |
| 679.3762207 | 52742.31982 | 679.314479 | (4a2h) <sub>6</sub> LA              | M+H-H <sub>2</sub> O (cyclic) | 90.88824824 |
| 693.3427734 | 27939.0476  | 693.282443 | (4a2h) <sub>4</sub> LA <sub>4</sub> | M+H-H <sub>2</sub> O (cyclic) | 87.02144214 |
| 708.3920898 | 7487.961148 | 708.341052 | (4a2h) <sub>7</sub>                 | M+H-H <sub>2</sub> O (cyclic) | 72.05264167 |
| 722.3729248 | 71394.94506 | 722.309016 | (4a2h) <sub>5</sub> LA <sub>3</sub> | M+H-H <sub>2</sub> O (cyclic) | 88.47848163 |
| 736.3734741 | 5038.285162 | 736.27698  | (4a2h) <sub>3</sub> LA <sub>6</sub> | M+H-H <sub>2</sub> O (cyclic) | 131.0568218 |
| 751.4077148 | 68382.78517 | 751.335589 | (4a2h) <sub>6</sub> LA <sub>2</sub> | M+H-H <sub>2</sub> O (cyclic) | 95.99684223 |
| 765.3768311 | 12201.02662 | 765.303553 | (4a2h) <sub>4</sub> LA <sub>5</sub> | M+H-H <sub>2</sub> O (cyclic) | 95.75031334 |
| 780.4337158 | 23835.15482 | 780.362162 | (4a2h) <sub>7</sub> LA              | M+H-H <sub>2</sub> O (cyclic) | 91.69309262 |
| 794.40448   | 37760.8861  | 794.330126 | (4a2h) <sub>5</sub> LA <sub>4</sub> | M+H-H <sub>2</sub> O (cyclic) | 93.60589202 |

|             |             |             |                                     |                               |             |
|-------------|-------------|-------------|-------------------------------------|-------------------------------|-------------|
| 823.43396   | 57880.14138 | 823.356699  | (4a2h) <sub>6</sub> LA <sub>3</sub> | M+H-H <sub>2</sub> O (cyclic) | 93.83656087 |
| 837.4158936 | 6953.435255 | 837.324663  | (4a2h) <sub>4</sub> LA <sub>6</sub> | M+H-H <sub>2</sub> O (cyclic) | 108.9548165 |
| 852.4661255 | 37074.11195 | 852.383272  | (4a2h) <sub>7</sub> LA <sub>2</sub> | M+H-H <sub>2</sub> O (cyclic) | 97.20215157 |
| 866.4376221 | 18277.77089 | 866.351236  | (4a2h) <sub>5</sub> LA <sub>5</sub> | M+H-H <sub>2</sub> O (cyclic) | 99.71252583 |
| 881.4817505 | 10476.86646 | 881.409845  | (4a2h) <sub>8</sub> LA              | M+H-H <sub>2</sub> O (cyclic) | 81.58008265 |
| 895.4604492 | 36897.1879  | 895.377809  | (4a2h) <sub>6</sub> LA <sub>4</sub> | M+H-H <sub>2</sub> O (cyclic) | 92.29647884 |
| 924.4910889 | 38167.21718 | 924.404382  | (4a2h) <sub>7</sub> LA <sub>3</sub> | M+H-H <sub>2</sub> O (cyclic) | 93.79755082 |
| 938.463623  | 9315.307001 | 938.372346  | (4a2h) <sub>5</sub> LA <sub>6</sub> | M+H-H <sub>2</sub> O (cyclic) | 97.27167194 |
| 953.5228271 | 17961.87844 | 953.430955  | (4a2h) <sub>8</sub> LA <sub>2</sub> | M+H-H <sub>2</sub> O (cyclic) | 96.35951877 |
| 967.491333  | 20212.78028 | 967.398919  | (4a2h) <sub>6</sub> LA <sub>5</sub> | M+H-H <sub>2</sub> O (cyclic) | 95.52833499 |
| 996.520874  | 28319.96781 | 996.425492  | (4a2h) <sub>7</sub> LA <sub>4</sub> | M+H-H <sub>2</sub> O (cyclic) | 95.72418988 |
| 1009.531433 | 6000.015279 | 1010.393456 | (4a2h) <sub>5</sub> LA <sub>7</sub> | M+H-H <sub>2</sub> O (cyclic) | 853.1556542 |
| 1025.549072 | 21264.62702 | 1025.452065 | (4a2h) <sub>8</sub> LA <sub>3</sub> | M+H-H <sub>2</sub> O (cyclic) | 94.59951695 |
| 1039.526733 | 10551.73249 | 1039.420029 | (4a2h) <sub>6</sub> LA <sub>6</sub> | M+H-H <sub>2</sub> O (cyclic) | 102.6576331 |
| 1068.548218 | 17510.4293  | 1068.446602 | (4a2h) <sub>7</sub> LA <sub>5</sub> | M+H-H <sub>2</sub> O (cyclic) | 95.10608187 |
| 1081.560547 | 5295.226308 | 1082.414566 | (4a2h) <sub>5</sub> LA <sub>8</sub> | M+H-H <sub>2</sub> O (cyclic) | 788.9944822 |
| 1097.582886 | 18080.18737 | 1097.473175 | (4a2h) <sub>8</sub> LA <sub>4</sub> | M+H-H <sub>2</sub> O (cyclic) | 99.96667117 |
| 1111.551025 | 5835.771056 | 1111.441139 | (4a2h) <sub>6</sub> LA <sub>7</sub> | M+H-H <sub>2</sub> O (cyclic) | 98.86838461 |
| 1140.577637 | 9875.486724 | 1140.467712 | (4a2h) <sub>7</sub> LA <sub>6</sub> | M+H-H <sub>2</sub> O (cyclic) | 96.38564849 |
| 1169.605347 | 13049.81845 | 1169.494285 | (4a2h) <sub>8</sub> LA <sub>5</sub> | M+H-H <sub>2</sub> O (cyclic) | 94.96556026 |
| 1212.605591 | 5658.185677 | 1212.488822 | (4a2h) <sub>7</sub> LA <sub>7</sub> | M+H-H <sub>2</sub> O (cyclic) | 96.30506928 |



**Table S7.** Peak list sorted by mass for poly(4a2h-PA) positive mode MALDI-TOF-MS (Figs. 3 and S7); sodiated and protonated peaks. “M+H/Na-H<sub>2</sub>O (cyclic)”: possibility of both dehydrated or cyclic species.

| Observed Mass (m/z) | Intensity   | Calculated Mass | Identity                            | Adduct                         | PPM         |
|---------------------|-------------|-----------------|-------------------------------------|--------------------------------|-------------|
| 203.1010284         | 137059.9526 | 203.102637      | (4a2h) <sub>2</sub>                 | M+H-H <sub>2</sub> O (cyclic)  | 7.919926712 |
| 286.1448669         | 187418.8148 | 286.13789       | (4a2h) <sub>2</sub>                 | M+ethanolamine+Na              | 24.38314968 |
| 304.1588745         | 75173.2404  | 304.15032       | (4a2h) <sub>3</sub>                 | M+H-H <sub>2</sub> O (cyclic)  | 28.12593457 |
| 351.1687317         | 135816.358  | 351.155067      | (4a2h) <sub>2</sub> PA              | M+H-H <sub>2</sub> O (cyclic)  | 38.91354642 |
| 373.1539917         | 12961.63055 | 373.137009      | (4a2h) <sub>2</sub> PA              | M+Na-H <sub>2</sub> O (cyclic) | 45.51330635 |
| 387.204071          | 48415.42214 | 387.185568      | (4a2h) <sub>3</sub>                 | M+ethanolamine+Na              | 47.78857098 |
| 405.2185669         | 28441.91319 | 405.198003      | (4a2h) <sub>4</sub>                 | M+H-H <sub>2</sub> O (cyclic)  | 50.75023778 |
| 434.2140503         | 100207.6384 | 434.190315      | (4a2h) <sub>2</sub> PA              | M+ethanolamine+Na              | 54.66564357 |
| 452.2330322         | 140878.5462 | 452.20275       | (4a2h) <sub>3</sub> PA              | M+H-H <sub>2</sub> O (cyclic)  | 66.96603902 |
| 474.2145996         | 15305.32683 | 474.184692      | (4a2h) <sub>3</sub> PA              | M+Na-H <sub>2</sub> O (cyclic) | 63.07164593 |
| 488.2664795         | 18613.46149 | 488.233251      | (4a2h) <sub>4</sub>                 | M+ethanolamine+Na              | 68.05864191 |
| 499.2427368         | 84734.30597 | 499.207497      | (4a2h) <sub>2</sub> PA <sub>2</sub> | M+H-H <sub>2</sub> O (cyclic)  | 70.59151998 |
| 506.2736511         | 10785.32174 | 506.245686      | (4a2h) <sub>5</sub>                 | M+H-H <sub>2</sub> O (cyclic)  | 55.24021986 |
| 521.225769          | 17451.59261 | 521.189439      | (4a2h) <sub>2</sub> PA <sub>2</sub> | M+Na-H <sub>2</sub> O (cyclic) | 69.70602296 |
| 535.2783813         | 78575.30583 | 535.237998      | (4a2h) <sub>3</sub> PA              | M+ethanolamine+Na              | 75.44932937 |
| 553.2901611         | 86865.58201 | 553.250433      | (4a2h) <sub>4</sub> PA              | M+H-H <sub>2</sub> O (cyclic)  | 71.80858908 |
| 568.239502          | 9981.198548 | 568.194186      | (4a2h)PA <sub>3</sub>               | M+Na-H <sub>2</sub> O (cyclic) | 79.75434124 |
| 575.2769165         | 11680.47309 | 575.232375      | (4a2h) <sub>4</sub> PA              | M+Na-H <sub>2</sub> O (cyclic) | 77.43219251 |
| 582.2903442         | 63748.79773 | 582.242745      | (4a2h) <sub>2</sub> PA <sub>2</sub> | M+ethanolamine+Na              | 81.75153475 |
| 589.3216553         | 7628.842563 | 589.280934      | (4a2h) <sub>5</sub>                 | M+ethanolamine+Na              | 69.10332687 |
| 600.3060913         | 119488.2189 | 600.25518       | (4a2h) <sub>3</sub> PA <sub>2</sub> | M+H-H <sub>2</sub> O (cyclic)  | 84.81610938 |
| 622.2883301         | 20752.57418 | 622.237122      | (4a2h) <sub>3</sub> PA <sub>2</sub> | M+Na-H <sub>2</sub> O (cyclic) | 82.2967261  |
| 636.3359985         | 41665.89492 | 636.285681      | (4a2h) <sub>4</sub> PA              | M+ethanolamine+Na              | 79.08009956 |

|             |             |            |                                     |                                |             |
|-------------|-------------|------------|-------------------------------------|--------------------------------|-------------|
| 647.3161011 | 56645.12028 | 647.259927 | (4a2h) <sub>2</sub> PA <sub>3</sub> | M+H-H <sub>2</sub> O (cyclic)  | 86.78750477 |
| 654.352478  | 42251.91545 | 654.298116 | (4a2h) <sub>5</sub> PA              | M+H-H <sub>2</sub> O (cyclic)  | 83.08449264 |
| 669.2957764 | 19558.7082  | 669.241869 | (4a2h) <sub>2</sub> PA <sub>3</sub> | M+Na-H <sub>2</sub> O (cyclic) | 80.54990206 |
| 676.331604  | 7467.884307 | 676.280058 | (4a2h) <sub>5</sub> PA              | M+Na-H <sub>2</sub> O (cyclic) | 76.21990829 |
| 683.3511963 | 62198.33413 | 683.290428 | (4a2h) <sub>3</sub> PA <sub>2</sub> | M+ethanolamine+Na              | 88.93478748 |
| 701.3654785 | 94700.75957 | 701.302863 | (4a2h) <sub>4</sub> PA <sub>2</sub> | M+H-H <sub>2</sub> O (cyclic)  | 89.28455779 |
| 723.3504028 | 17013.52254 | 723.284805 | (4a2h) <sub>4</sub> PA <sub>2</sub> | M+Na-H <sub>2</sub> O (cyclic) | 90.69433167 |
| 730.3626099 | 30695.39719 | 730.295175 | (4a2h) <sub>2</sub> PA <sub>3</sub> | M+ethanolamine+Na              | 92.33918737 |
| 737.3949585 | 19879.16011 | 737.333364 | (4a2h) <sub>5</sub> PA              | M+ethanolamine+Na              | 83.53683559 |
| 748.3719482 | 97161.30323 | 748.30761  | (4a2h) <sub>3</sub> PA <sub>3</sub> | M+H-H <sub>2</sub> O (cyclic)  | 85.9783345  |
| 755.4136353 | 18682.30459 | 755.345799 | (4a2h) <sub>6</sub> PA              | M+H-H <sub>2</sub> O (cyclic)  | 89.80820982 |
| 770.3582764 | 23621.76205 | 770.289552 | (4a2h) <sub>3</sub> PA <sub>3</sub> | M+Na-H <sub>2</sub> O (cyclic) | 89.21887467 |
| 784.4096069 | 41680.91185 | 784.338111 | (4a2h) <sub>4</sub> PA <sub>2</sub> | M+ethanolamine+Na              | 91.15448172 |
| 795.3866577 | 12735.68778 | 795.312357 | (4a2h) <sub>2</sub> PA <sub>4</sub> | M+H-H <sub>2</sub> O (cyclic)  | 93.42331267 |
| 802.4229736 | 56445.73916 | 802.350546 | (4a2h) <sub>5</sub> PA <sub>2</sub> | M+H-H <sub>2</sub> O (cyclic)  | 90.26931353 |
| 817.3812256 | 7418.371807 | 817.294299 | (4a2h) <sub>2</sub> PA <sub>4</sub> | M+Na-H <sub>2</sub> O (cyclic) | 106.3589776 |
| 824.4047241 | 11305.92803 | 824.332488 | (4a2h) <sub>5</sub> PA <sub>2</sub> | M+Na-H <sub>2</sub> O (cyclic) | 87.62983632 |
| 831.4217529 | 47071.89637 | 831.342858 | (4a2h) <sub>3</sub> PA <sub>3</sub> | M+ethanolamine+Na              | 94.90059275 |
| 838.4538574 | 9516.653737 | 838.381047 | (4a2h) <sub>6</sub> PA              | M+ethanolamine+Na              | 86.84645515 |
| 849.4319458 | 89008.77399 | 849.355293 | (4a2h) <sub>4</sub> PA <sub>3</sub> | M+H-H <sub>2</sub> O (cyclic)  | 90.24821724 |
| 856.4654541 | 8301.332901 | 856.393482 | (4a2h) <sub>7</sub> PA              | M+H-H <sub>2</sub> O (cyclic)  | 84.04092688 |
| 871.4228516 | 21206.89675 | 871.337235 | (4a2h) <sub>4</sub> PA <sub>3</sub> | M+Na-H <sub>2</sub> O (cyclic) | 98.2588125  |
| 878.4338379 | 6997.332038 | 878.347605 | (4a2h) <sub>2</sub> PA <sub>4</sub> | M+ethanolamine+Na              | 98.17626929 |
| 885.4654541 | 23825.25791 | 885.385794 | (4a2h) <sub>5</sub> PA <sub>2</sub> | M+ethanolamine+Na              | 89.97219352 |
| 896.4425049 | 37989.79361 | 896.36004  | (4a2h) <sub>3</sub> PA <sub>4</sub> | M+H-H <sub>2</sub> O (cyclic)  | 91.99973149 |
| 903.4847412 | 29744.27566 | 903.398229 | (4a2h) <sub>6</sub> PA <sub>2</sub> | M+H-H <sub>2</sub> O (cyclic)  | 95.76309563 |

|             |             |             |                                     |                                |             |
|-------------|-------------|-------------|-------------------------------------|--------------------------------|-------------|
| 918.4304199 | 12478.51659 | 918.341982  | (4a2h) <sub>3</sub> PA <sub>4</sub> | M+Na-H <sub>2</sub> O (cyclic) | 96.30173044 |
| 925.4657593 | 7209.437315 | 925.380171  | (4a2h) <sub>6</sub> PA <sub>2</sub> | M+Na-H <sub>2</sub> O (cyclic) | 92.4898541  |
| 932.4813843 | 40030.55625 | 932.390541  | (4a2h) <sub>4</sub> PA <sub>3</sub> | M+ethanolamine+Na              | 97.43050042 |
| 939.4924316 | 5238.321615 | 939.42873   | (4a2h) <sub>7</sub> PA              | M+ethanolamine+Na              | 67.80891298 |
| 943.4725952 | 5709.115833 | 943.364787  | (4a2h) <sub>2</sub> PA <sub>5</sub> | M+H-H <sub>2</sub> O (cyclic)  | 114.2805164 |
| 950.4935303 | 59568.77598 | 950.402976  | (4a2h) <sub>5</sub> PA <sub>3</sub> | M+H-H <sub>2</sub> O (cyclic)  | 95.27987105 |
| 972.4821167 | 14865.20188 | 972.384918  | (4a2h) <sub>5</sub> PA <sub>3</sub> | M+Na-H <sub>2</sub> O (cyclic) | 99.95907711 |
| 979.4909058 | 14764.80323 | 979.395288  | (4a2h) <sub>3</sub> PA <sub>4</sub> | M+ethanolamine+Na              | 97.62938741 |
| 986.5249023 | 12427.25465 | 986.433477  | (4a2h) <sub>6</sub> PA <sub>2</sub> | M+ethanolamine+Na              | 92.68272634 |
| 997.5007324 | 52151.51073 | 997.407723  | (4a2h) <sub>4</sub> PA <sub>4</sub> | M+H-H <sub>2</sub> O (cyclic)  | 93.25115482 |
| 1004.534729 | 14309.10144 | 1004.445912 | (4a2h) <sub>7</sub> PA <sub>2</sub> | M+H-H <sub>2</sub> O (cyclic)  | 88.42387523 |
| 1019.489014 | 14606.61892 | 1019.389665 | (4a2h) <sub>4</sub> PA <sub>4</sub> | M+Na-H <sub>2</sub> O (cyclic) | 97.45897316 |
| 1033.539795 | 25627.29835 | 1033.438224 | (4a2h) <sub>5</sub> PA <sub>3</sub> | M+ethanolamine+Na              | 98.28446214 |
| 1044.519409 | 8049.175896 | 1044.41247  | (4a2h) <sub>3</sub> PA <sub>5</sub> | M+H-H <sub>2</sub> O (cyclic)  | 102.3917112 |
| 1051.55249  | 33206.36071 | 1051.450659 | (4a2h) <sub>6</sub> PA <sub>3</sub> | M+H-H <sub>2</sub> O (cyclic)  | 96.84832011 |
| 1073.535278 | 8977.046764 | 1073.432601 | (4a2h) <sub>6</sub> PA <sub>3</sub> | M+Na-H <sub>2</sub> O (cyclic) | 95.65325285 |
| 1080.548462 | 19051.87764 | 1080.442971 | (4a2h) <sub>4</sub> PA <sub>4</sub> | M+ethanolamine+Na              | 97.636722   |
| 1087.57605  | 6355.580857 | 1087.48116  | (4a2h) <sub>7</sub> PA <sub>2</sub> | M+ethanolamine+Na              | 87.25650015 |
| 1098.560791 | 45769.06684 | 1098.455406 | (4a2h) <sub>5</sub> PA <sub>4</sub> | M+H-H <sub>2</sub> O (cyclic)  | 95.9392793  |
| 1105.587646 | 6610.105902 | 1105.493595 | (4a2h) <sub>8</sub> PA <sub>2</sub> | M+H-H <sub>2</sub> O (cyclic)  | 85.07645854 |
| 1120.551636 | 12461.83988 | 1120.437348 | (4a2h) <sub>5</sub> PA <sub>4</sub> | M+Na-H <sub>2</sub> O (cyclic) | 102.002794  |
| 1134.596558 | 13748.86947 | 1134.485907 | (4a2h) <sub>6</sub> PA <sub>3</sub> | M+ethanolamine+Na              | 97.53371048 |
| 1145.575317 | 12678.41333 | 1145.460153 | (4a2h) <sub>4</sub> PA <sub>5</sub> | M+H-H <sub>2</sub> O (cyclic)  | 100.5398396 |
| 1152.604248 | 15819.89438 | 1152.498342 | (4a2h) <sub>7</sub> PA <sub>3</sub> | M+H-H <sub>2</sub> O (cyclic)  | 91.89258339 |
| 1174.587891 | 5035.794002 | 1174.480284 | (4a2h) <sub>7</sub> PA <sub>3</sub> | M+Na-H <sub>2</sub> O (cyclic) | 91.62062698 |
| 1181.609253 | 15856.70201 | 1181.490654 | (4a2h) <sub>5</sub> PA <sub>4</sub> | M+ethanolamine+Na              | 100.3807602 |

|             |             |             |                                     |                                |             |
|-------------|-------------|-------------|-------------------------------------|--------------------------------|-------------|
| 1199.615845 | 29918.04387 | 1199.503089 | (4a2h) <sub>6</sub> PA <sub>4</sub> | M+H-H <sub>2</sub> O (cyclic)  | 94.00203387 |
| 1221.606689 | 8716.703415 | 1221.485031 | (4a2h) <sub>6</sub> PA <sub>4</sub> | M+Na-H <sub>2</sub> O (cyclic) | 99.59880548 |
| 1235.64502  | 6982.360499 | 1235.53359  | (4a2h) <sub>7</sub> PA <sub>3</sub> | M+ethanolamine+Na              | 90.18737402 |
| 1246.626343 | 15159.01792 | 1246.507836 | (4a2h) <sub>5</sub> PA <sub>5</sub> | M+H-H <sub>2</sub> O (cyclic)  | 95.07101887 |
| 1253.661987 | 7539.637977 | 1253.546025 | (4a2h) <sub>8</sub> PA <sub>3</sub> | M+H-H <sub>2</sub> O (cyclic)  | 92.50741312 |
| 1268.61731  | 5055.243486 | 1268.489778 | (4a2h) <sub>5</sub> PA <sub>5</sub> | M+Na-H <sub>2</sub> O (cyclic) | 100.5381141 |
| 1282.659058 | 10846.77469 | 1282.538337 | (4a2h) <sub>6</sub> PA <sub>4</sub> | M+ethanolamine+Na              | 94.12632474 |
| 1300.675781 | 16468.14796 | 1300.550772 | (4a2h) <sub>7</sub> PA <sub>4</sub> | M+H-H <sub>2</sub> O (cyclic)  | 96.1202382  |
| 1322.665771 | 5318.028955 | 1322.532714 | (4a2h) <sub>7</sub> PA <sub>4</sub> | M+Na-H <sub>2</sub> O (cyclic) | 100.6080822 |
| 1347.688599 | 13565.55857 | 1347.555519 | (4a2h) <sub>6</sub> PA <sub>5</sub> | M+H-H <sub>2</sub> O (cyclic)  | 98.75632441 |
| 1383.717651 | 6322.22457  | 1383.58602  | (4a2h) <sub>7</sub> PA <sub>4</sub> | M+ethanolamine+Na              | 95.13782887 |
| 1401.734741 | 8172.217933 | 1401.598455 | (4a2h) <sub>8</sub> PA <sub>4</sub> | M+H-H <sub>2</sub> O (cyclic)  | 97.236273   |
| 1448.746338 | 9724.808944 | 1448.603202 | (4a2h) <sub>7</sub> PA <sub>5</sub> | M+H-H <sub>2</sub> O (cyclic)  | 98.80959106 |
| 1549.799072 | 5826.728473 | 1549.650885 | (4a2h) <sub>8</sub> PA <sub>5</sub> | M+H-H <sub>2</sub> O (cyclic)  | 95.62622874 |

**Table S8.** Peak list sorted by adduct and then mass and also colorcoded (for ease of visualization) for poly(4a2h-PA) positive mode MALDI-TOF-MS (**Figs. 3** and **S7**); sodiated and protonated peaks. “M+H/Na-H<sub>2</sub>O (cyclic)”: possibility of both dehydrated or cyclic species.

| Observed Mass (m/z) | Intensity   | Calculated Mass | Identity                            | Adduct            | PPM         |
|---------------------|-------------|-----------------|-------------------------------------|-------------------|-------------|
| 286.1448669         | 187418.8148 | 286.13789       | (4a2h) <sub>2</sub>                 | M+ethanolamine+Na | 24.38314968 |
| 387.204071          | 48415.42214 | 387.185568      | (4a2h) <sub>3</sub>                 | M+ethanolamine+Na | 47.78857098 |
| 434.2140503         | 100207.6384 | 434.190315      | (4a2h) <sub>2</sub> PA              | M+ethanolamine+Na | 54.66564357 |
| 488.2664795         | 18613.46149 | 488.233251      | (4a2h) <sub>4</sub>                 | M+ethanolamine+Na | 68.05864191 |
| 535.2783813         | 78575.30583 | 535.237998      | (4a2h) <sub>3</sub> PA              | M+ethanolamine+Na | 75.44932937 |
| 582.2903442         | 63748.79773 | 582.242745      | (4a2h) <sub>2</sub> PA <sub>2</sub> | M+ethanolamine+Na | 81.75153475 |
| 589.3216553         | 7628.842563 | 589.280934      | (4a2h) <sub>5</sub>                 | M+ethanolamine+Na | 69.10332687 |
| 636.3359985         | 41665.89492 | 636.285681      | (4a2h) <sub>4</sub> PA              | M+ethanolamine+Na | 79.08009956 |
| 683.3511963         | 62198.33413 | 683.290428      | (4a2h) <sub>3</sub> PA <sub>2</sub> | M+ethanolamine+Na | 88.93478748 |
| 730.3626099         | 30695.39719 | 730.295175      | (4a2h) <sub>2</sub> PA <sub>3</sub> | M+ethanolamine+Na | 92.33918737 |
| 737.3949585         | 19879.16011 | 737.333364      | (4a2h) <sub>5</sub> PA              | M+ethanolamine+Na | 83.53683559 |
| 784.4096069         | 41680.91185 | 784.338111      | (4a2h) <sub>4</sub> PA <sub>2</sub> | M+ethanolamine+Na | 91.15448172 |
| 831.4217529         | 47071.89637 | 831.342858      | (4a2h) <sub>3</sub> PA <sub>3</sub> | M+ethanolamine+Na | 94.90059275 |
| 838.4538574         | 9516.653737 | 838.381047      | (4a2h) <sub>6</sub> PA              | M+ethanolamine+Na | 86.84645515 |
| 878.4338379         | 6997.332038 | 878.347605      | (4a2h) <sub>2</sub> PA <sub>4</sub> | M+ethanolamine+Na | 98.17626929 |
| 885.4654541         | 23825.25791 | 885.385794      | (4a2h) <sub>5</sub> PA <sub>2</sub> | M+ethanolamine+Na | 89.97219352 |
| 932.4813843         | 40030.55625 | 932.390541      | (4a2h) <sub>4</sub> PA <sub>3</sub> | M+ethanolamine+Na | 97.43050042 |
| 939.4924316         | 5238.321615 | 939.42873       | (4a2h) <sub>7</sub> PA              | M+ethanolamine+Na | 67.80891298 |
| 979.4909058         | 14764.80323 | 979.395288      | (4a2h) <sub>3</sub> PA <sub>4</sub> | M+ethanolamine+Na | 97.62938741 |
| 986.5249023         | 12427.25465 | 986.433477      | (4a2h) <sub>6</sub> PA <sub>2</sub> | M+ethanolamine+Na | 92.68272634 |
| 1033.539795         | 25627.29835 | 1033.438224     | (4a2h) <sub>5</sub> PA <sub>3</sub> | M+ethanolamine+Na | 98.28446214 |
| 1080.548462         | 19051.87764 | 1080.442971     | (4a2h) <sub>4</sub> PA <sub>4</sub> | M+ethanolamine+Na | 97.636722   |
| 1087.57605          | 6355.580857 | 1087.48116      | (4a2h) <sub>7</sub> PA <sub>2</sub> | M+ethanolamine+Na | 87.25650015 |

|             |             |             |                                     |                               |             |
|-------------|-------------|-------------|-------------------------------------|-------------------------------|-------------|
| 1134.596558 | 13748.86947 | 1134.485907 | (4a2h) <sub>6</sub> PA <sub>3</sub> | M+ethanolamine+Na             | 97.53371048 |
| 1181.609253 | 15856.70201 | 1181.490654 | (4a2h) <sub>5</sub> PA <sub>4</sub> | M+ethanolamine+Na             | 100.3807602 |
| 1235.64502  | 6982.360499 | 1235.53359  | (4a2h) <sub>7</sub> PA <sub>3</sub> | M+ethanolamine+Na             | 90.18737402 |
| 1282.659058 | 10846.77469 | 1282.538337 | (4a2h) <sub>6</sub> PA <sub>4</sub> | M+ethanolamine+Na             | 94.12632474 |
| 1383.717651 | 6322.22457  | 1383.58602  | (4a2h) <sub>7</sub> PA <sub>4</sub> | M+ethanolamine+Na             | 95.13782887 |
| 203.1010284 | 137059.9526 | 203.102637  | (4a2h) <sub>2</sub>                 | M+H-H <sub>2</sub> O (cyclic) | 7.919926712 |
| 304.1588745 | 75173.2404  | 304.15032   | (4a2h) <sub>3</sub>                 | M+H-H <sub>2</sub> O (cyclic) | 28.12593457 |
| 351.1687317 | 135816.358  | 351.155067  | (4a2h) <sub>2</sub> PA              | M+H-H <sub>2</sub> O (cyclic) | 38.91354642 |
| 405.2185669 | 28441.91319 | 405.198003  | (4a2h) <sub>4</sub>                 | M+H-H <sub>2</sub> O (cyclic) | 50.75023778 |
| 452.2330322 | 140878.5462 | 452.20275   | (4a2h) <sub>3</sub> PA              | M+H-H <sub>2</sub> O (cyclic) | 66.96603902 |
| 499.2427368 | 84734.30597 | 499.207497  | (4a2h) <sub>2</sub> PA <sub>2</sub> | M+H-H <sub>2</sub> O (cyclic) | 70.59151998 |
| 506.2736511 | 10785.32174 | 506.245686  | (4a2h) <sub>5</sub>                 | M+H-H <sub>2</sub> O (cyclic) | 55.24021986 |
| 553.2901611 | 86865.58201 | 553.250433  | (4a2h) <sub>4</sub> PA              | M+H-H <sub>2</sub> O (cyclic) | 71.80858908 |
| 600.3060913 | 119488.2189 | 600.25518   | (4a2h) <sub>3</sub> PA <sub>2</sub> | M+H-H <sub>2</sub> O (cyclic) | 84.81610938 |
| 647.3161011 | 56645.12028 | 647.259927  | (4a2h) <sub>2</sub> PA <sub>3</sub> | M+H-H <sub>2</sub> O (cyclic) | 86.78750477 |
| 654.352478  | 42251.91545 | 654.298116  | (4a2h) <sub>5</sub> PA              | M+H-H <sub>2</sub> O (cyclic) | 83.08449264 |
| 701.3654785 | 94700.75957 | 701.302863  | (4a2h) <sub>4</sub> PA <sub>2</sub> | M+H-H <sub>2</sub> O (cyclic) | 89.28455779 |
| 748.3719482 | 97161.30323 | 748.30761   | (4a2h) <sub>3</sub> PA <sub>3</sub> | M+H-H <sub>2</sub> O (cyclic) | 85.9783345  |
| 755.4136353 | 18682.30459 | 755.345799  | (4a2h) <sub>6</sub> PA              | M+H-H <sub>2</sub> O (cyclic) | 89.80820982 |
| 795.3866577 | 12735.68778 | 795.312357  | (4a2h) <sub>2</sub> PA <sub>4</sub> | M+H-H <sub>2</sub> O (cyclic) | 93.42331267 |
| 802.4229736 | 56445.73916 | 802.350546  | (4a2h) <sub>5</sub> PA <sub>2</sub> | M+H-H <sub>2</sub> O (cyclic) | 90.26931353 |
| 849.4319458 | 89008.77399 | 849.355293  | (4a2h) <sub>4</sub> PA <sub>3</sub> | M+H-H <sub>2</sub> O (cyclic) | 90.24821724 |
| 856.4654541 | 8301.332901 | 856.393482  | (4a2h) <sub>7</sub> PA              | M+H-H <sub>2</sub> O (cyclic) | 84.04092688 |
| 896.4425049 | 37989.79361 | 896.36004   | (4a2h) <sub>3</sub> PA <sub>4</sub> | M+H-H <sub>2</sub> O (cyclic) | 91.99973149 |
| 903.4847412 | 29744.27566 | 903.398229  | (4a2h) <sub>6</sub> PA <sub>2</sub> | M+H-H <sub>2</sub> O (cyclic) | 95.76309563 |
| 943.4725952 | 5709.115833 | 943.364787  | (4a2h) <sub>2</sub> PA <sub>5</sub> | M+H-H <sub>2</sub> O (cyclic) | 114.2805164 |

|             |             |             |                                     |                                |             |
|-------------|-------------|-------------|-------------------------------------|--------------------------------|-------------|
| 950.4935303 | 59568.77598 | 950.402976  | (4a2h) <sub>5</sub> PA <sub>3</sub> | M+H-H <sub>2</sub> O (cyclic)  | 95.27987105 |
| 997.5007324 | 52151.51073 | 997.407723  | (4a2h) <sub>4</sub> PA <sub>4</sub> | M+H-H <sub>2</sub> O (cyclic)  | 93.25115482 |
| 1004.534729 | 14309.10144 | 1004.445912 | (4a2h) <sub>7</sub> PA <sub>2</sub> | M+H-H <sub>2</sub> O (cyclic)  | 88.42387523 |
| 1044.519409 | 8049.175896 | 1044.41247  | (4a2h) <sub>3</sub> PA <sub>5</sub> | M+H-H <sub>2</sub> O (cyclic)  | 102.3917112 |
| 1051.55249  | 33206.36071 | 1051.450659 | (4a2h) <sub>6</sub> PA <sub>3</sub> | M+H-H <sub>2</sub> O (cyclic)  | 96.84832011 |
| 1098.560791 | 45769.06684 | 1098.455406 | (4a2h) <sub>5</sub> PA <sub>4</sub> | M+H-H <sub>2</sub> O (cyclic)  | 95.9392793  |
| 1105.587646 | 6610.105902 | 1105.493595 | (4a2h) <sub>8</sub> PA <sub>2</sub> | M+H-H <sub>2</sub> O (cyclic)  | 85.07645854 |
| 1145.575317 | 12678.41333 | 1145.460153 | (4a2h) <sub>4</sub> PA <sub>5</sub> | M+H-H <sub>2</sub> O (cyclic)  | 100.5398396 |
| 1152.604248 | 15819.89438 | 1152.498342 | (4a2h) <sub>7</sub> PA <sub>3</sub> | M+H-H <sub>2</sub> O (cyclic)  | 91.89258339 |
| 1199.615845 | 29918.04387 | 1199.503089 | (4a2h) <sub>6</sub> PA <sub>4</sub> | M+H-H <sub>2</sub> O (cyclic)  | 94.00203387 |
| 1246.626343 | 15159.01792 | 1246.507836 | (4a2h) <sub>5</sub> PA <sub>5</sub> | M+H-H <sub>2</sub> O (cyclic)  | 95.07101887 |
| 1253.661987 | 7539.637977 | 1253.546025 | (4a2h) <sub>8</sub> PA <sub>3</sub> | M+H-H <sub>2</sub> O (cyclic)  | 92.50741312 |
| 1300.675781 | 16468.14796 | 1300.550772 | (4a2h) <sub>7</sub> PA <sub>4</sub> | M+H-H <sub>2</sub> O (cyclic)  | 96.1202382  |
| 1347.688599 | 13565.55857 | 1347.555519 | (4a2h) <sub>6</sub> PA <sub>5</sub> | M+H-H <sub>2</sub> O (cyclic)  | 98.75632441 |
| 1401.734741 | 8172.217933 | 1401.598455 | (4a2h) <sub>8</sub> PA <sub>4</sub> | M+H-H <sub>2</sub> O (cyclic)  | 97.236273   |
| 1448.746338 | 9724.808944 | 1448.603202 | (4a2h) <sub>7</sub> PA <sub>5</sub> | M+H-H <sub>2</sub> O (cyclic)  | 98.80959106 |
| 1549.799072 | 5826.728473 | 1549.650885 | (4a2h) <sub>8</sub> PA <sub>5</sub> | M+H-H <sub>2</sub> O (cyclic)  | 95.62622874 |
| 373.1539917 | 12961.63055 | 373.137009  | (4a2h) <sub>2</sub> PA              | M+Na-H <sub>2</sub> O (cyclic) | 45.51330635 |
| 474.2145996 | 15305.32683 | 474.184692  | (4a2h) <sub>3</sub> PA              | M+Na-H <sub>2</sub> O (cyclic) | 63.07164593 |
| 521.225769  | 17451.59261 | 521.189439  | (4a2h) <sub>2</sub> PA <sub>2</sub> | M+Na-H <sub>2</sub> O (cyclic) | 69.70602296 |
| 568.239502  | 9981.198548 | 568.194186  | (4a2h)PA <sub>3</sub>               | M+Na-H <sub>2</sub> O (cyclic) | 79.75434124 |
| 575.2769165 | 11680.47309 | 575.232375  | (4a2h) <sub>4</sub> PA              | M+Na-H <sub>2</sub> O (cyclic) | 77.43219251 |
| 622.2883301 | 20752.57418 | 622.237122  | (4a2h) <sub>3</sub> PA <sub>2</sub> | M+Na-H <sub>2</sub> O (cyclic) | 82.2967261  |
| 669.2957764 | 19558.7082  | 669.241869  | (4a2h) <sub>2</sub> PA <sub>3</sub> | M+Na-H <sub>2</sub> O (cyclic) | 80.54990206 |
| 676.331604  | 7467.884307 | 676.280058  | (4a2h) <sub>5</sub> PA              | M+Na-H <sub>2</sub> O (cyclic) | 76.21990829 |
| 723.3504028 | 17013.52254 | 723.284805  | (4a2h) <sub>4</sub> PA <sub>2</sub> | M+Na-H <sub>2</sub> O (cyclic) | 90.69433167 |



|             |             |             |                                     |                                |             |
|-------------|-------------|-------------|-------------------------------------|--------------------------------|-------------|
| 770.3582764 | 23621.76205 | 770.289552  | (4a2h) <sub>3</sub> PA <sub>3</sub> | M+Na-H <sub>2</sub> O (cyclic) | 89.21887467 |
| 817.3812256 | 7418.371807 | 817.294299  | (4a2h) <sub>2</sub> PA <sub>4</sub> | M+Na-H <sub>2</sub> O (cyclic) | 106.3589776 |
| 824.4047241 | 11305.92803 | 824.332488  | (4a2h) <sub>5</sub> PA <sub>2</sub> | M+Na-H <sub>2</sub> O (cyclic) | 87.62983632 |
| 871.4228516 | 21206.89675 | 871.337235  | (4a2h) <sub>4</sub> PA <sub>3</sub> | M+Na-H <sub>2</sub> O (cyclic) | 98.2588125  |
| 918.4304199 | 12478.51659 | 918.341982  | (4a2h) <sub>3</sub> PA <sub>4</sub> | M+Na-H <sub>2</sub> O (cyclic) | 96.30173044 |
| 925.4657593 | 7209.437315 | 925.380171  | (4a2h) <sub>6</sub> PA <sub>2</sub> | M+Na-H <sub>2</sub> O (cyclic) | 92.4898541  |
| 972.4821167 | 14865.20188 | 972.384918  | (4a2h) <sub>5</sub> PA <sub>3</sub> | M+Na-H <sub>2</sub> O (cyclic) | 99.95907711 |
| 1019.489014 | 14606.61892 | 1019.389665 | (4a2h) <sub>4</sub> PA <sub>4</sub> | M+Na-H <sub>2</sub> O (cyclic) | 97.45897316 |
| 1073.535278 | 8977.046764 | 1073.432601 | (4a2h) <sub>6</sub> PA <sub>3</sub> | M+Na-H <sub>2</sub> O (cyclic) | 95.65325285 |
| 1120.551636 | 12461.83988 | 1120.437348 | (4a2h) <sub>5</sub> PA <sub>4</sub> | M+Na-H <sub>2</sub> O (cyclic) | 102.002794  |
| 1174.587891 | 5035.794002 | 1174.480284 | (4a2h) <sub>7</sub> PA <sub>3</sub> | M+Na-H <sub>2</sub> O (cyclic) | 91.62062698 |
| 1221.606689 | 8716.703415 | 1221.485031 | (4a2h) <sub>6</sub> PA <sub>4</sub> | M+Na-H <sub>2</sub> O (cyclic) | 99.59880548 |
| 1268.61731  | 5055.243486 | 1268.489778 | (4a2h) <sub>5</sub> PA <sub>5</sub> | M+Na-H <sub>2</sub> O (cyclic) | 100.5381141 |
| 1322.665771 | 5318.028955 | 1322.532714 | (4a2h) <sub>7</sub> PA <sub>4</sub> | M+Na-H <sub>2</sub> O (cyclic) | 100.6080822 |

**Table S9.** Peak list sorted by mass for poly(4a2h-SA) positive mode MALDI-TOF-MS (Figs. 3 and S7); sodiated and protonated peaks. “M+H-H<sub>2</sub>O (cyclic)”: possibility of both dehydrated or cyclic species.

| Observed Mass (m/z) | Intensity   | Calculated Mass | Identity                            | Adduct                        | PPM         |
|---------------------|-------------|-----------------|-------------------------------------|-------------------------------|-------------|
| 203.1082611         | 119627.7243 | 203.102637      | (4a2h) <sub>2</sub>                 | M+H-H <sub>2</sub> O (cyclic) | 27.69096494 |
| 286.1534729         | 138296.5019 | 286.13789       | (4a2h) <sub>2</sub>                 | M+ethanolamine+Na             | 54.45940767 |
| 304.1632996         | 79547.49402 | 304.15032       | (4a2h) <sub>3</sub>                 | M+H-H <sub>2</sub> O (cyclic) | 42.67482277 |
| 335.145752          | 45208.77016 | 335.127147      | (4a2h) <sub>2</sub> SA              | M+H-H <sub>2</sub> O (cyclic) | 55.51610237 |
| 387.2140808         | 64667.31716 | 387.185568      | (4a2h) <sub>3</sub>                 | M+ethanolamine+Na             | 73.64120297 |
| 405.2236633         | 31962.4951  | 405.198003      | (4a2h) <sub>4</sub>                 | M+H-H <sub>2</sub> O (cyclic) | 63.32787874 |
| 418.1920471         | 34312.11079 | 418.162395      | (4a2h) <sub>2</sub> SA              | M+ethanolamine+Na             | 70.91053465 |
| 436.2015381         | 61431.72595 | 436.17483       | (4a2h) <sub>3</sub> SA              | M+H-H <sub>2</sub> O (cyclic) | 61.23252458 |
| 467.1861877         | 10903.82403 | 467.151657      | (4a2h) <sub>2</sub> SA <sub>2</sub> | M+H-H <sub>2</sub> O (cyclic) | 73.91763142 |
| 488.2720947         | 24187.12329 | 488.233251      | (4a2h) <sub>4</sub>                 | M+ethanolamine+Na             | 79.55977378 |
| 506.2850952         | 10026.07337 | 506.245686      | (4a2h) <sub>5</sub>                 | M+H-H <sub>2</sub> O (cyclic) | 77.84602633 |
| 519.2550659         | 37057.09256 | 519.210078      | (4a2h) <sub>3</sub> SA              | M+ethanolamine+Na             | 86.64685049 |
| 537.2675781         | 36690.33756 | 537.222513      | (4a2h) <sub>4</sub> SA              | M+H-H <sub>2</sub> O (cyclic) | 83.88539927 |
| 550.2336426         | 7235.814997 | 550.186905      | (4a2h) <sub>2</sub> SA <sub>2</sub> | M+ethanolamine+Na             | 84.94854671 |
| 568.2455444         | 21107.43784 | 568.19934       | (4a2h) <sub>3</sub> SA <sub>2</sub> | M+H-H <sub>2</sub> O (cyclic) | 81.31729614 |
| 589.3278198         | 7174.857536 | 589.280934      | (4a2h) <sub>5</sub>                 | M+ethanolamine+Na             | 79.56446797 |
| 620.3115845         | 20729.73856 | 620.2578        | (4a2h) <sub>4</sub> SA              | M+ethanolamine+Na             | 86.77597667 |
| 638.3253784         | 16077.44795 | 638.270196      | (4a2h) <sub>5</sub> SA              | M+H-H <sub>2</sub> O (cyclic) | 86.45620357 |
| 651.2932739         | 12060.34898 | 651.234588      | (4a2h) <sub>3</sub> SA <sub>2</sub> | M+ethanolamine+Na             | 90.11487885 |
| 669.3023071         | 17325.23547 | 669.247023      | (4a2h) <sub>4</sub> SA <sub>2</sub> | M+H-H <sub>2</sub> O (cyclic) | 82.60646234 |
| 700.2886353         | 5774.033225 | 700.22385       | (4a2h) <sub>3</sub> SA <sub>3</sub> | M+H-H <sub>2</sub> O (cyclic) | 92.52077603 |
| 721.3756104         | 8676.655065 | 721.305444      | (4a2h) <sub>5</sub> SA              | M+ethanolamine+Na             | 97.27689231 |
| 739.3847046         | 6555.611082 | 739.317879      | (4a2h) <sub>6</sub> SA1             | M+H-H <sub>2</sub> O (cyclic) | 90.38816982 |

|             |             |            |                                     |                               |             |
|-------------|-------------|------------|-------------------------------------|-------------------------------|-------------|
| 752.355896  | 8958.850791 | 752.2823   | (4a2h) <sub>4</sub> SA <sub>2</sub> | M+ethanolamine+Na             | 97.8688437  |
| 770.3652954 | 10377.94951 | 770.294706 | (4a2h) <sub>5</sub> SA <sub>2</sub> | M+H-H <sub>2</sub> O (cyclic) | 91.6394848  |
| 801.3500977 | 6084.155758 | 801.271533 | (4a2h) <sub>4</sub> SA <sub>3</sub> | M+H-H <sub>2</sub> O (cyclic) | 98.04997777 |

**Table S10.** Peak list sorted by adduct and then mass and also colorcoded (for ease of visualization) for poly(4a2h-SA) positive mode MALDI-TOF-MS (**Figs. 3** and **S7**); sodiated and protonated peaks. “M+H-H<sub>2</sub>O (cyclic)”: possibility of both dehydrated or cyclic species.

| Observed Mass (m/z) | Intensity   | Calculated Mass | Identity                            | Adduct                        | PPM         |
|---------------------|-------------|-----------------|-------------------------------------|-------------------------------|-------------|
| 286.1534729         | 138296.5019 | 286.13789       | (4a2h) <sub>2</sub>                 | M+ethanolamine+Na             | 54.45940767 |
| 387.2140808         | 64667.31716 | 387.185568      | (4a2h) <sub>3</sub>                 | M+ethanolamine+Na             | 73.64120297 |
| 418.1920471         | 34312.11079 | 418.162395      | (4a2h) <sub>2</sub> SA              | M+ethanolamine+Na             | 70.91053465 |
| 488.2720947         | 24187.12329 | 488.233251      | (4a2h) <sub>4</sub>                 | M+ethanolamine+Na             | 79.55977378 |
| 519.2550659         | 37057.09256 | 519.210078      | (4a2h) <sub>3</sub> SA              | M+ethanolamine+Na             | 86.64685049 |
| 550.2336426         | 7235.814997 | 550.186905      | (4a2h) <sub>2</sub> SA <sub>2</sub> | M+ethanolamine+Na             | 84.94854671 |
| 589.3278198         | 7174.857536 | 589.280934      | (4a2h) <sub>5</sub>                 | M+ethanolamine+Na             | 79.56446797 |
| 620.3115845         | 20729.73856 | 620.2578        | (4a2h) <sub>4</sub> SA              | M+ethanolamine+Na             | 86.77597667 |
| 651.2932739         | 12060.34898 | 651.234588      | (4a2h) <sub>3</sub> SA <sub>2</sub> | M+ethanolamine+Na             | 90.11487885 |
| 721.3756104         | 8676.655065 | 721.305444      | (4a2h) <sub>5</sub> SA              | M+ethanolamine+Na             | 97.27689231 |
| 752.355896          | 8958.850791 | 752.2823        | (4a2h) <sub>4</sub> SA <sub>2</sub> | M+ethanolamine+Na             | 97.8688437  |
| 203.1082611         | 119627.7243 | 203.102637      | (4a2h) <sub>2</sub>                 | M+H-H <sub>2</sub> O (cyclic) | 27.69096494 |
| 304.1632996         | 79547.49402 | 304.15032       | (4a2h) <sub>3</sub>                 | M+H-H <sub>2</sub> O (cyclic) | 42.67482277 |
| 335.145752          | 45208.77016 | 335.127147      | (4a2h) <sub>2</sub> SA              | M+H-H <sub>2</sub> O (cyclic) | 55.51610237 |
| 405.2236633         | 31962.4951  | 405.198003      | (4a2h) <sub>4</sub>                 | M+H-H <sub>2</sub> O (cyclic) | 63.32787874 |
| 436.2015381         | 61431.72595 | 436.17483       | (4a2h) <sub>3</sub> SA              | M+H-H <sub>2</sub> O (cyclic) | 61.23252458 |
| 467.1861877         | 10903.82403 | 467.151657      | (4a2h) <sub>2</sub> SA <sub>2</sub> | M+H-H <sub>2</sub> O (cyclic) | 73.91763142 |
| 506.2850952         | 10026.07337 | 506.245686      | (4a2h) <sub>5</sub>                 | M+H-H <sub>2</sub> O (cyclic) | 77.84602633 |
| 537.2675781         | 36690.33756 | 537.222513      | (4a2h) <sub>4</sub> SA              | M+H-H <sub>2</sub> O (cyclic) | 83.88539927 |
| 568.2455444         | 21107.43784 | 568.19934       | (4a2h) <sub>3</sub> SA <sub>2</sub> | M+H-H <sub>2</sub> O (cyclic) | 81.31729614 |
| 638.3253784         | 16077.44795 | 638.270196      | (4a2h) <sub>5</sub> SA              | M+H-H <sub>2</sub> O (cyclic) | 86.45620357 |
| 669.3023071         | 17325.23547 | 669.247023      | (4a2h) <sub>4</sub> SA <sub>2</sub> | M+H-H <sub>2</sub> O (cyclic) | 82.60646234 |
| 700.2886353         | 5774.033225 | 700.22385       | (4a2h) <sub>3</sub> SA <sub>3</sub> | M+H-H <sub>2</sub> O (cyclic) | 92.52077603 |

|             |             |            |                                     |                               |             |
|-------------|-------------|------------|-------------------------------------|-------------------------------|-------------|
| 739.3847046 | 6555.611082 | 739.317879 | (4a2h)6SA1                          | M+H-H <sub>2</sub> O (cyclic) | 90.38816982 |
| 770.3652954 | 10377.94951 | 770.294706 | (4a2h)5SA2                          | M+H-H <sub>2</sub> O (cyclic) | 91.6394848  |
| 801.3500977 | 6084.155758 | 801.271533 | (4a2h) <sub>4</sub> SA <sub>3</sub> | M+H-H <sub>2</sub> O (cyclic) | 98.04997777 |

**Table S11.** Peak list sorted by mass for poly(4a2h-MA) positive mode MALDI-TOF-MS (Figs. 3 and S7)); sodiated and protonated peaks. “M+H-H<sub>2</sub>O (cyclic)”: possibility of both dehydrated or cyclic species.

| Observed Mass (m/z) | Intensity   | Calculated Mass | Identity                            | Adduct                        | PPM         |
|---------------------|-------------|-----------------|-------------------------------------|-------------------------------|-------------|
| 203.1118774         | 61217.23984 | 203.102637      | (4a2h) <sub>2</sub>                 | M+H-H <sub>2</sub> O (cyclic) | 45.49641076 |
| 286.1534729         | 59098.51242 | 286.13789       | (4a2h) <sub>2</sub>                 | M+ethanolamine+Na             | 54.45940767 |
| 304.1677246         | 38826.89896 | 304.15032       | (4a2h) <sub>3</sub>                 | M+H-H <sub>2</sub> O (cyclic) | 57.22370767 |
| 317.1872253         | 46808.71956 | 317.170717      | (4a2h) <sub>2</sub> MA              | M+H-H <sub>2</sub> O (cyclic) | 52.04875833 |
| 387.2140808         | 21416.12425 | 387.185568      | (4a2h) <sub>3</sub>                 | M+ethanolamine+Na             | 73.64120297 |
| 400.2329102         | 22744.67772 | 400.205965      | (4a2h) <sub>2</sub> MA              | M+ethanolamine+Na             | 67.32822186 |
| 405.2236633         | 15895.80825 | 405.198003      | (4a2h) <sub>4</sub>                 | M+H-H <sub>2</sub> O (cyclic) | 63.32787874 |
| 418.2492065         | 51464.6359  | 418.2184        | (4a2h) <sub>3</sub> MA              | M+H-H <sub>2</sub> O (cyclic) | 73.66137645 |
| 431.2703247         | 25806.98307 | 431.238797      | (4a2h) <sub>2</sub> MA <sub>2</sub> | M+H-H <sub>2</sub> O (cyclic) | 73.10962562 |
| 488.2720947         | 7823.612667 | 488.233251      | (4a2h) <sub>4</sub>                 | M+ethanolamine+Na             | 79.55977378 |
| 501.2944946         | 19271.03419 | 501.253648      | (4a2h) <sub>3</sub> MA              | M+ethanolamine+Na             | 81.4889411  |
| 506.2850952         | 5339.720985 | 506.245686      | (4a2h) <sub>5</sub>                 | M+H-H <sub>2</sub> O (cyclic) | 77.84602633 |
| 514.3158569         | 10465.10194 | 514.274045      | (4a2h) <sub>2</sub> MA <sub>2</sub> | M+ethanolamine+Na             | 81.30282756 |
| 519.3071899         | 30128.49217 | 519.266083      | (4a2h) <sub>4</sub> MA              | M+H-H <sub>2</sub> O (cyclic) | 79.16353936 |
| 532.3309326         | 33528.91296 | 532.28648       | (4a2h) <sub>3</sub> MA <sub>2</sub> | M+H-H <sub>2</sub> O (cyclic) | 83.51257954 |
| 545.3502197         | 12750.27915 | 545.306877      | (4a2h) <sub>2</sub> MA <sub>3</sub> | M+H-H <sub>2</sub> O (cyclic) | 79.48318429 |
| 602.3504639         | 10335.776   | 602.301331      | (4a2h) <sub>4</sub> MA              | M+ethanolamine+Na             | 81.57522567 |
| 615.3770752         | 10687.08136 | 615.321728      | (4a2h) <sub>3</sub> MA <sub>2</sub> | M+ethanolamine+Na             | 89.94838388 |
| 620.3622437         | 14124.68433 | 620.313766      | (4a2h) <sub>5</sub> MA              | M+H-H <sub>2</sub> O (cyclic) | 78.15021149 |
| 633.3897705         | 25799.72225 | 633.334163      | (4a2h) <sub>4</sub> MA <sub>2</sub> | M+H-H <sub>2</sub> O (cyclic) | 87.8012134  |

|             |             |            |                                     |                               |             |
|-------------|-------------|------------|-------------------------------------|-------------------------------|-------------|
| 646.4109497 | 19576.36245 | 646.35456  | (4a2h) <sub>3</sub> MA <sub>3</sub> | M+H-H <sub>2</sub> O (cyclic) | 87.24268457 |
| 716.4333496 | 7321.153815 | 716.369411 | (4a2h) <sub>4</sub> MA <sub>2</sub> | M+ethanolamine+Na             | 89.25368395 |
| 721.4234009 | 5715.255404 | 721.361449 | (4a2h) <sub>6</sub> MA              | M+H-H <sub>2</sub> O (cyclic) | 85.88188222 |
| 734.4498291 | 14634.74789 | 734.381846 | (4a2h) <sub>5</sub> MA <sub>2</sub> | M+H-H <sub>2</sub> O (cyclic) | 92.57187166 |
| 747.4680176 | 16847.41138 | 747.402243 | (4a2h) <sub>4</sub> MA <sub>3</sub> | M+H-H <sub>2</sub> O (cyclic) | 88.00425556 |
| 760.4887085 | 7543.129313 | 760.42264  | (4a2h) <sub>3</sub> MA <sub>4</sub> | M+H-H <sub>2</sub> O (cyclic) | 86.88391498 |
| 835.5036621 | 7313.521706 | 835.429529 | (4a2h) <sub>6</sub> MA <sub>2</sub> | M+H-H <sub>2</sub> O (cyclic) | 88.73651987 |
| 848.5279541 | 11279.42892 | 848.449926 | (4a2h) <sub>5</sub> MA <sub>3</sub> | M+H-H <sub>2</sub> O (cyclic) | 91.96547682 |
| 949.5841064 | 6558.255092 | 949.497609 | (4a2h) <sub>6</sub> MA <sub>3</sub> | M+H-H <sub>2</sub> O (cyclic) | 91.09811776 |
| 962.6081543 | 6296.545552 | 962.518006 | (4a2h) <sub>5</sub> MA <sub>4</sub> | M+H-H <sub>2</sub> O (cyclic) | 93.65881619 |

**Table S12.** Peak list sorted by adduct and then mass and also colorcoded (for ease of visualization) for poly(4a2h-MA) positive mode MALDI-TOF-MS (**Figs. 3** and **S7**)); sodiated and protonated peaks. “M+H-H<sub>2</sub>O (cyclic)”’: possibility of both dehydrated or cyclic species.

| Observed Mass (m/z) | Intensity   | Calculated Mass | Identity                            | Adduct                        | PPM         |
|---------------------|-------------|-----------------|-------------------------------------|-------------------------------|-------------|
| 286.1534729         | 59098.51242 | 286.13789       | (4a2h) <sub>2</sub>                 | M+ethanolamine+Na             | 54.45940767 |
| 387.2140808         | 21416.12425 | 387.185568      | (4a2h) <sub>3</sub>                 | M+ethanolamine+Na             | 73.64120297 |
| 400.2329102         | 22744.67772 | 400.205965      | (4a2h) <sub>2</sub> MA              | M+ethanolamine+Na             | 67.32822186 |
| 488.2720947         | 7823.612667 | 488.233251      | (4a2h) <sub>4</sub>                 | M+ethanolamine+Na             | 79.55977378 |
| 501.2944946         | 19271.03419 | 501.253648      | (4a2h) <sub>3</sub> MA              | M+ethanolamine+Na             | 81.4889411  |
| 514.3158569         | 10465.10194 | 514.274045      | (4a2h) <sub>2</sub> MA <sub>2</sub> | M+ethanolamine+Na             | 81.30282756 |
| 602.3504639         | 10335.776   | 602.301331      | (4a2h) <sub>4</sub> MA              | M+ethanolamine+Na             | 81.57522567 |
| 615.3770752         | 10687.08136 | 615.321728      | (4a2h) <sub>3</sub> MA <sub>2</sub> | M+ethanolamine+Na             | 89.94838388 |
| 716.4333496         | 7321.153815 | 716.369411      | (4a2h) <sub>4</sub> MA <sub>2</sub> | M+ethanolamine+Na             | 89.25368395 |
| 203.1118774         | 61217.23984 | 203.102637      | (4a2h) <sub>2</sub>                 | M+H-H <sub>2</sub> O (cyclic) | 45.49641076 |
| 304.1677246         | 38826.89896 | 304.15032       | (4a2h) <sub>3</sub>                 | M+H-H <sub>2</sub> O (cyclic) | 57.22370767 |
| 317.1872253         | 46808.71956 | 317.170717      | (4a2h) <sub>2</sub> MA              | M+H-H <sub>2</sub> O (cyclic) | 52.04875833 |
| 405.2236633         | 15895.80825 | 405.198003      | (4a2h) <sub>4</sub>                 | M+H-H <sub>2</sub> O (cyclic) | 63.32787874 |

|             |             |            |                                     |                               |             |
|-------------|-------------|------------|-------------------------------------|-------------------------------|-------------|
| 418.2492065 | 51464.6359  | 418.2184   | (4a2h) <sub>3</sub> MA              | M+H-H <sub>2</sub> O (cyclic) | 73.66137645 |
| 431.2703247 | 25806.98307 | 431.238797 | (4a2h) <sub>2</sub> MA <sub>2</sub> | M+H-H <sub>2</sub> O (cyclic) | 73.10962562 |
| 506.2850952 | 5339.720985 | 506.245686 | (4a2h) <sub>5</sub>                 | M+H-H <sub>2</sub> O (cyclic) | 77.84602633 |
| 519.3071899 | 30128.49217 | 519.266083 | (4a2h) <sub>4</sub> MA              | M+H-H <sub>2</sub> O (cyclic) | 79.16353936 |
| 532.3309326 | 33528.91296 | 532.28648  | (4a2h) <sub>3</sub> MA <sub>2</sub> | M+H-H <sub>2</sub> O (cyclic) | 83.51257954 |
| 545.3502197 | 12750.27915 | 545.306877 | (4a2h) <sub>2</sub> MA <sub>3</sub> | M+H-H <sub>2</sub> O (cyclic) | 79.48318429 |
| 620.3622437 | 14124.68433 | 620.313766 | (4a2h) <sub>5</sub> MA              | M+H-H <sub>2</sub> O (cyclic) | 78.15021149 |
| 633.3897705 | 25799.72225 | 633.334163 | (4a2h) <sub>4</sub> MA <sub>2</sub> | M+H-H <sub>2</sub> O (cyclic) | 87.8012134  |
| 646.4109497 | 19576.36245 | 646.35456  | (4a2h) <sub>3</sub> MA <sub>3</sub> | M+H-H <sub>2</sub> O (cyclic) | 87.24268457 |
| 721.4234009 | 5715.255404 | 721.361449 | (4a2h) <sub>6</sub> MA              | M+H-H <sub>2</sub> O (cyclic) | 85.88188222 |
| 734.4498291 | 14634.74789 | 734.381846 | (4a2h) <sub>5</sub> MA <sub>2</sub> | M+H-H <sub>2</sub> O (cyclic) | 92.57187166 |
| 747.4680176 | 16847.41138 | 747.402243 | (4a2h) <sub>4</sub> MA <sub>3</sub> | M+H-H <sub>2</sub> O (cyclic) | 88.00425556 |
| 760.4887085 | 7543.129313 | 760.42264  | (4a2h) <sub>3</sub> MA <sub>4</sub> | M+H-H <sub>2</sub> O (cyclic) | 86.88391498 |
| 835.5036621 | 7313.521706 | 835.429529 | (4a2h) <sub>6</sub> MA <sub>2</sub> | M+H-H <sub>2</sub> O (cyclic) | 88.73651987 |
| 848.5279541 | 11279.42892 | 848.449926 | (4a2h) <sub>5</sub> MA <sub>3</sub> | M+H-H <sub>2</sub> O (cyclic) | 91.96547682 |
| 949.5841064 | 6558.255092 | 949.497609 | (4a2h) <sub>6</sub> MA <sub>3</sub> | M+H-H <sub>2</sub> O (cyclic) | 91.09811776 |
| 962.6081543 | 6296.545552 | 962.518006 | (4a2h) <sub>5</sub> MA <sub>4</sub> | M+H-H <sub>2</sub> O (cyclic) | 93.65881619 |



**Table S13.** Compositional ratios of polyesters containing 4a2h and one other  $\alpha$ HA which assemble into droplets. Cells with “X” indicate that the conditions were not tested in this study, as these conditions were generally not near the “Droplet”/”No Droplet” transition. Relevant microscopy images can be found in **Figs. 4, 5, S11, S12, and S23** and in reference<sup>6</sup>; the associated phase diagram is depicted as **Fig. 6**.

|                 | <b>4a2h:GA</b>     | <b>4a2h:LA</b>     | <b>4a2h:PA</b>     | <b>4a2h:SA</b>     | <b>4a2h:MA</b>     |
|-----------------|--------------------|--------------------|--------------------|--------------------|--------------------|
| <b>0% 4a2h</b>  | <i>No Droplets</i> | Droplets           | Droplets           | Droplets           | Droplets           |
| <b>10% 4a2h</b> | X                  | Droplets           | X                  | X                  | X                  |
| <b>20% 4a2h</b> | X                  | <i>No Droplets</i> | Droplets           | Droplets           | Droplets           |
| <b>40% 4a2h</b> | X                  | X                  | Droplets           | X                  | Droplets           |
| <b>50% 4a2h</b> | <i>No Droplets</i> | <i>No Droplets</i> | Droplets           | <i>No Droplets</i> | Droplets           |
| <b>60% 4a2h</b> | X                  | X                  | Droplets           | X                  | <i>No Droplets</i> |
| <b>80% 4a2h</b> | X                  | X                  | <i>No Droplets</i> | X                  | <i>No Droplets</i> |

## References

- (1) Strohm, M.; Hassman, M.; Košata, B.; Kodíček, M. mMass Data Miner: An Open Source Alternative for Mass Spectrometric Data Analysis. *Rapid Commun. Mass Spectrom.* **2008**, *22* (6), 905–908.
- (2) Strohm, M.; Kavan, D.; Novák, P.; Volný, M.; Havlíček, V. mMass 3: A Cross-Platform Software Environment for Precise Analysis of Mass Spectrometric Data. *Anal. Chem.* **2010**, *82* (11), 4648–4651.
- (3) Niedermeyer, T. H. J.; Strohm, M. mMass as a Software Tool for the Annotation of Cyclic Peptide Tandem Mass Spectra. *PLoS One* **2012**, *7* (9), e44913.
- (4) Herzfeld, J.; Rand, D.; Matsuki, Y.; Daviso, E.; Mak-Jurkauskas, M.; Mamajanov, I. Molecular Structure of Humin and Melanoidin via Solid State NMR. *J. Phys. Chem. B* **2011**, *115* (19), 5741–5745.
- (5) Frenkel-Pinter, M.; Haynes, J. W.; Mohyeldin, A. M.; C, M.; Sargon, A. B.; Petrov, A. S.; Krishnamurthy, R.; Hud, N. V.; Williams, L. D.; Leman, L. J. Mutually Stabilizing Interactions between Proto-Peptides and RNA. *Nat. Commun.* **2020**, *11* (1), 3137.
- (6) Jia, T. Z.; Chandru, K.; Hongo, Y.; Afrin, R.; Usui, T.; Myojo, K.; Cleaves, H. J. Membraneless Polyester Microdroplets as Primordial Compartments at the Origins of Life. *Proc. Natl. Acad. Sci. U. S. A.* **2019**, *116* (32), 15830–15835.
